# 1       **Single-cell genomic atlas of great ape cerebral organoids uncovers human-** 2       **specific features of brain development**

3  
4       \*Sabina Kanton<sup>1</sup>, \*Michael James Boyle<sup>1</sup>, \*Zhisong He<sup>1,2</sup>, Malgorzata Santel<sup>1</sup>, Anne  
5       Weigert<sup>1</sup>, Fatima Sanchis Calleja<sup>1,2</sup>, Leila Sidow<sup>1</sup>, Jonas Fleck<sup>2</sup>, Patricia Guijarro<sup>3</sup>, Dingding  
6       Han<sup>3</sup>, Zhengzong Qian<sup>3</sup>, Michael Heide<sup>4</sup>, Wieland Huttner<sup>4</sup>, Philipp Khaitovich<sup>3,5</sup>, Svante  
7       Pääbo<sup>1</sup>, Barbara Treutlein<sup>1,2,\$</sup>, J. Gray Camp<sup>1,6,\$</sup>

8  
9       Affiliations:

10      <sup>1</sup> Max Planck Institute for Evolutionary Anthropology, Leipzig, Germany

11      <sup>2</sup> Department of Biosystems Science and Engineering, ETH Zürich, Basel, Switzerland

12      <sup>3</sup> CAS Key Laboratory of Computational Biology, CAS-MPG Partner Institute for  
13      Computational Biology, Shanghai, China.

14      <sup>4</sup> Max Planck Institute of Molecular Cell Biology and Genetics, Dresden, Germany

15      <sup>5</sup> Center for Neurobiology and Brain Restoration, Skolkovo Institute of Science and  
16      Technology, Moscow, Russia.

17      <sup>6</sup> Institute of Molecular and Clinical Ophthalmology, Basel, Switzerland.

18  
19      \* These authors contributed equally to this work

20      \$ These authors contributed equally to this work

21  
22      **Correspondence:** J. Gray Camp ([grayson.camp@iob.ch](mailto:grayson.camp@iob.ch)), Barbara Treutlein  
23      ([barbara.treutlein@bsse.ethz.ch](mailto:barbara.treutlein@bsse.ethz.ch)), Zhisong He ([zhisong.he@bsse.ethz.ch](mailto:zhisong.he@bsse.ethz.ch))

## 24 25      **ABSTRACT**

26  
27      **The human brain has changed dramatically since humans diverged from our closest**  
28      **living relatives, chimpanzees and the other great apes<sup>1-5</sup>. However, the genetic and**  
29      **developmental programs underlying this divergence are not fully understood<sup>6-8</sup>. Here,**  
30      **we have analyzed stem cell-derived cerebral organoids using single-cell**  
31      **transcriptomics (scRNA-seq) and accessible chromatin profiling (scATAC-seq) to**  
32      **explore gene regulatory changes that are specific to humans. We first analyze cell**  
33      **composition and reconstruct differentiation trajectories over the entire course of**  
34      **human cerebral organoid development from pluripotency, through neuroectoderm**  
35      **and neuroepithelial stages, followed by divergence into neuronal fates within the**  
36      **dorsal and ventral forebrain, midbrain and hindbrain regions. We find that brain**  
37      **region composition varies in organoids from different iPSC lines, yet regional gene**  
38      **expression patterns are largely reproducible across individuals. We then analyze**  
39      **chimpanzee and macaque cerebral organoids and find that human neuronal**  
40      **development proceeds at a delayed pace relative to the other two primates. Through**  
41      **pseudotemporal alignment of differentiation paths, we identify human-specific gene**  
42      **expression resolved to distinct cell states along progenitor to neuron lineages in the**

43 **cortex. We find that chromatin accessibility is dynamic during cortex development,**  
44 **and identify instances of accessibility divergence between human and chimpanzee**  
45 **that correlate with human-specific gene expression and genetic change. Finally, we**  
46 **map human-specific expression in adult prefrontal cortex using single-nucleus RNA-**  
47 **seq and find developmental differences that persist into adulthood, as well as cell**  
48 **state-specific changes that occur exclusively in the adult brain. Our data provide a**  
49 **temporal cell atlas of great ape forebrain development, and illuminate dynamic gene**  
50 **regulatory features that are unique to humans.**

51

52

### 53 **MAIN TEXT**

54 Bulk genomic measurements in primary brain tissue from humans, chimpanzees and other  
55 apes have identified molecular features that appear specific to the human brain<sup>9-13</sup>. These  
56 studies have been limited to a snapshot of adult brain tissues, or average measurements  
57 across heterogeneous cell populations. Time course measurements of rhesus macaque  
58 brain development provide insights into developmental divergence in primates<sup>14</sup>, but it has  
59 been difficult to perform similar experiments in great apes due to the lack of available  
60 tissue. Cerebral organoids<sup>15</sup> grown from human and other great ape induced pluripotent  
61 stem cells (iPSCs)<sup>16</sup> offer the exciting potential to study the evolution of human brain  
62 development in controlled culture environments. Previously, we and others have shown  
63 that human and chimpanzee cerebral organoids recapitulate many aspects of *in vivo* cortex  
64 development<sup>17-22</sup>. In particular, low-throughput single-cell transcriptomics on cortical-like  
65 regions within human and chimpanzee cerebral organoids revealed that gene expression  
66 patterns of early fetal neocortex development were largely recapitulated in the  
67 organoids<sup>17,19</sup>, and comparative analyses revealed changes between human and  
68 chimpanzee<sup>21</sup>. Higher throughput scRNA-seq methodologies enable genomic dissection of  
69 individual organoids with the potential to study gene expression landscapes across  
70 multiple brain regions<sup>23,24</sup> and from multiple individuals. Here, we set out to use high-  
71 throughput single-cell RNA-seq, together with accessible chromatin profiling, to  
72 understand human cerebral organoid development from pluripotency, and to explore how  
73 human cortical gene expression programs have diverged from the other great apes. We  
74 further analyze adult prefrontal cortex tissue using single-nucleus RNA-Seq to reveal the  
75 potential and limits of cerebral organoids to study human-specific expression patterns  
76 observed in the mature brain.

77 We first used droplet-based scRNA-seq (10X genomics) to profile cell composition  
78 across a time course of human organoid development (pluripotency: 0 days (d); embryoid  
79 body: 4d; neuroectoderm: 10d; neuroepithelium: 15d; organoid stages: 1, 2, and 4 months  
80 (m)) from two human pluripotent stem cell lines (H9, embryonic stem cell (ESC), 23,226  
81 cells; 409b2, iPSC, 20,272 cells; Fig. 1a,b; Extended Data Fig. 1). Marker gene analysis of  
82 two-dimensional t-SNE projections of the data from each time point separately, as well as  
83 all time points combined, revealed distinct progenitor, neuronal, astrocyte, and  
84 mesenchymal populations that emerged across the time course, with intermixing of iPSC  
85 and ESC-derived cells (Fig. 1c; Extended Data Fig. 2). We generated pseudocells by  
86 combining nearest neighbors in the high dimension gene expression space, which resulted  
87 in a more robust transcript estimation (on average ~6,000 genes detected per pseudocell  
88 compared to ~3,000 genes per single cell). We then constructed a force-directed k-nearest

89 neighbors graph<sup>25</sup> to visualize the temporal progression of the data (Fig. 1d, Extended Data  
90 Fig. 3). We track a progression through pluripotent, neuroectodermal, and neuroepithelial  
91 stem cell states during the first 15 days of differentiation. By 1 month, cells diversify into  
92 neural progenitors from multiple brain regions including the forebrain (dorsal and ventral  
93 telencephalon, diencephalon), midbrain (mesencephalon), and hindbrain  
94 (rhombencephalon). A small subpopulation resembling retinal progenitors of the developing  
95 eye field is also present, but these cells were only detected in an iPSC 409b2-derived  
96 organoid. In addition, a non-neuronal mesenchymal population appears from both cell lines  
97 early in the differentiation time course. By 2 months, excitatory and inhibitory neuronal fates  
98 have differentiated from progenitors of multiple brain regions, and by 4 months astrocytes  
99 have emerged (Fig. 1e). These observations were based on the supervised analysis of  
100 known marker genes and inspection of *in situ* patterns from the Allen Developing Mouse  
101 Brain Atlas, comparisons to bulk RNA-seq data from microdissected regions of the  
102 developing human brain (BrainSpan data<sup>26</sup>) and single-cell reference maps of cell  
103 prototypes from the dorsal and ventral telencephalon<sup>27</sup>, as well as the analysis of spliced  
104 and unspliced transcripts using RNA velocity<sup>28</sup> (Fig. 1e,f; Extended Data Fig. 3-4). Together,  
105 this data provides a temporally and pseudotemporally resolved gene expression atlas of  
106 the earliest stages of human brain development.

107 We next analyzed the reproducibility of these gene expression patterns across PSC  
108 lines from different human individuals (Fig. 2a; Extended Data Fig. 5). In addition to the 2  
109 lines (iPSC 409b2 and ESC H9) described above, we generated single-cell transcriptomic  
110 data from 2 month old organoids from 5 additional iPSC lines (Sc102a1, 9,525 cells; Wibj2,  
111 13,356; Kucg2, 4,395; Hoik1, 2,660; Sojd3, 3,830), resulting in a total of 62,305 cells from  
112 20 organoids. We identified cells on the neuronal lineage (49,153 cells), for which we  
113 constructed pseudocells as described above. We then quantified the similarity (Pearson  
114 correlation) of each pseudocell transcriptome to each time point and brain region bulk  
115 RNA-seq reference transcriptome from the developing human brain (BrainSpan<sup>29</sup>). We used  
116 these similarities to calculate a reference similarity spectrum (RSS) score for each  
117 pseudocell, used SPRING to reconstruct the relationships between pseudocells based on  
118 RSS, and projected all single cells to the SPRING-based pseudocell embedding. This  
119 analysis revealed neuronal differentiation trajectories representing ventral and dorsal  
120 telencephalon, as well as distinct populations of cortical excitatory (GLI3, EOMES,  
121 NEUROD6), ventral telencephalon inhibitory (DLX1, SOX6, GAD1/2), diencephalon  
122 excitatory, diencephalon inhibitory (with Cajal-Retzius cell signatures), mesen- (or midbrain)  
123 and rhombencephalon (hindbrain) excitatory, and mesen- and rhombencephalon inhibitory  
124 neurons (Fig. 2b-f). Notably, the use of RSS as input for the SPRING analysis instead of the  
125 transcriptomes resulted in a well-integrated projection of the data from all human  
126 individuals without the need for further integration approaches (Extended Data Fig. 5). Cell  
127 annotations were also confirmed through comparisons to voxel maps of *in situ*  
128 hybridization patterns from the developing mouse brain (Extended Data Fig. 5). Molecular  
129 signatures of the annotated cell types match with those in published scRNA-seq data sets  
130 of human cerebral organoids and fetal human brain tissues (Extended Data Fig. 6)<sup>21,27</sup>. We  
131 found that each iPSC line contributed cells to multiple differentiation trajectories, however  
132 the proportions of cells in each trajectory varied across organoid and iPSC line (Fig. 2d;  
133 Extended Data Fig. 5). For example, over 90% of cells from the line Kucg2 were on the  
134 cortical excitatory (dorsal) trajectory in each of the 3 organoids, whereas Hoik1-derived

135 organoids predominantly contained cells from non-telencephalic regions. This tendency of  
136 iPSC lines to form different compendiums of brain regions and cell types is consistent with  
137 prior work in the literature<sup>23,30</sup>. Nonetheless, the brain region-specific gene expression  
138 patterns across the lines were highly correlated (median of Pearson correlation of  
139 pseudotemporally dependent genes: 0.91 and 0.90 for dorsal and ventral trajectories,  
140 respectively) and cells from each region clustered together (Fig. 2g-i). This data suggests  
141 that even though there is variation in the relative proportion of cell types that form in each  
142 organoid, the gene expression patterns within each brain region are largely reproduced  
143 across diverse human pluripotent stem cell lines, thus providing a baseline for identifying  
144 human-specific gene expression.

145 We next used chimpanzee organoids to identify features that differ from early  
146 human brain development. As for humans, we generated an atlas of gene expression  
147 across chimpanzee organoid development from pluripotency to 4 months in culture (Fig.  
148 3a, Extended Data Fig. 7). Similar to human, chimpanzee organoids were morphologically  
149 complex with cortical-like regions containing apically located PAX6-positive progenitor  
150 cells and basally located neurons (Fig. 3b), with intermediates in between<sup>19</sup>. From the  
151 scRNA-seq data, we identified dorsal and ventral telencephalon differentiation trajectories,  
152 as well as rhombencephalon cell populations in chimpanzee organoids with a graph  
153 topology and gene expression patterns that were very similar to those observed in human  
154 (Fig. 3c-e). One difference was that upper and deep layer neurons in these chimpanzee  
155 organoids appeared to diversify and mature at an earlier stage along the cortical excitatory  
156 trajectory (Extended Data Fig. 8). We used a time warping algorithm to align the iPSC-to-  
157 cortical excitatory neuron pseudotimes from human and chimpanzee and observed that the  
158 later time points in chimpanzee failed to map to a human pseudocell counterpart (Fig. 3f,g).  
159 This observation suggested that neurons within chimpanzee organoid cortical regions may  
160 develop at a faster rate than in humans. In support of this observation we found that human  
161 dorsal telencephalon pseudocells projected to earlier parts of the developmental trajectory  
162 reconstructed in fetal human brain tissues<sup>27</sup> than the chimp counterpart (Fig. 3h). In  
163 addition, we found that neuron maturation scores based on the cumulative expression of  
164 neuron projection, synapse assembly, and neurotransmitter secretion genes increased to  
165 higher levels in chimpanzee relative to human neurons over the time course (Fig. 3i,  
166 Extended Data Fig. 8). We also observed significantly more astrocytes relative to the  
167 number of radial glia (RG) cells in chimpanzee in 2- and 4-month organoids compared to  
168 humans (Fig. 3j). To determine the heterogeneity in organoid maturation across iPSC lines,  
169 we analyzed single-cell RNA-seq data (Smart-seq2) from additional human (15 individuals,  
170 52 organoids) and chimpanzee (11 individuals, 38 organoids) organoids<sup>19,21</sup>. Indeed, we  
171 found that there is heterogeneity in terms of upper and deep layer bifurcation timing that  
172 could be dependent on iPSC lines or organoid protocols. However, we found significant  
173 consistency across lines, organoids, and protocols in our assessment of neuron maturation  
174 based on gene expression (Extended Data Fig. 8). To determine if this difference in  
175 maturation timing is specific to humans, we generated cerebral organoids from macaque  
176 ESCs and analyzed 2 and 4 month organoids using single-cell transcriptomics (Extended  
177 Data Fig. 9). We found that upper and deep layer neurons diverge as early as 2 months,  
178 and that neurons mature over an even shorter time frame than in chimpanzees. Also, more  
179 upper layer neurons were detected in fetal macaque brain tissues compared with fetal  
180 human brain tissues with similar ages (Extended Data Fig. 8). This is consistent with



181 expectations from previous reports comparing human and macaque brain development *in*  
182 *vivo*<sup>14</sup> and *in vitro* 2D cultures<sup>18,31</sup>. Together, this data suggests that delayed maturation of the  
183 human brain<sup>11,29,32,33</sup> can be traced back to very early stages of brain development.

184 We next wanted to detect gene expression changes in the developing cortex that  
185 have occurred since humans diverged with chimpanzees (Fig. 4a). We first inspected the  
186 expression patterns of human genes resulting from duplication or rearrangement that do  
187 not exist in other apes (Extended Data Fig. 10)<sup>34-37</sup>. We found that 22 of these 41 genes are  
188 detected in our human cerebral organoid data, and four of them (ARHGAP11B, FAM72B,  
189 FAM72C, FAM72D) are highly-specific to G2M phase progenitors of the dorsal and ventral  
190 telencephalon (Extended Data Fig. 10). ARHGAP11B has previously been shown to  
191 regulate basal radial glia cell proliferation and self-renewal<sup>38</sup> and our data highlights the  
192 specificity of expression to a distinct phase of the cell cycle, and shows that expression is  
193 highly specific to RG progenitors along the time course of cortex development.

194 To identify quantitative gene expression differences between the primates, we first  
195 aligned all human, chimpanzee and macaque reads to a consensus genome and then  
196 aligned pseudotimes of dorsal telencephalon progenitor to early-born deep layer neuron  
197 trajectory between the species (Fig. 4b; Extended Data Fig. 11). We searched for genes  
198 that vary in expression along the pseudotime in each species, and find that 76.6% of these  
199 pseudotemporally dynamic genes have a conserved expression pattern. They represent  
200 ancestral gene regulatory programs that have been preserved in the primate developing  
201 cortex. We then searched for genes that are differentially expressed specifically on the  
202 human branch, and identified 98 genes, 96 of which clustered into seven different  
203 pseudotemporal patterns (Fig. 4c,d). Notably, clusters 1, 2, and 3 were enriched in human  
204 RGs, IPs, and neurons, respectively, and projections onto the entire human and  
205 chimpanzee cortical differentiation trajectory from pluripotency revealed specificity of  
206 differential expression to these cortical excitatory cell populations (Fig. 4e,f). Surprisingly,  
207 we observed that most of the human-specific deviations from chimpanzee and macaque  
208 were expression gains, rather than the loss of expression, in humans (Fig. 4g). This gain of  
209 expression skew was also observed for chimpanzee-specific changes relative to human  
210 and macaque (Extended Data Fig. 11). Our interpretation is that it could be more  
211 deleterious to lose a highly conserved gene expression pattern than it is to gain the  
212 expression of a new gene. Genes with gain of human-specific expression have no specific  
213 gene ontology enrichment, but are predicted to be involved in diverse cell biological  
214 processes including RG proliferation, neuron migration, neurite formation and are localized  
215 to different components of maturing neurons including axons, dendrites, and synapses  
216 (Fig. 4h). When comparing our results to previously published datasets generated using  
217 different single-cell RNA-seq methods (Fluidigm C1, Smart-seq2), as well as to human and  
218 macaque fetal data, we find strong overlap between the datasets (Extended Data Fig. 11).  
219 We also performed a similar comparison between human and chimp using cells of ventral  
220 telencephalon identity, and find 92 human-chimp DE genes, with 17% being distinct from  
221 what was observed in the cortex (Extended Data Fig. 12). Together, this analysis identifies  
222 human-specific gene expression changes that can be specific to certain cell states within  
223 the developing human forebrain.

224 To identify potential mechanisms that could underlie the human-specific gain and  
225 loss of gene expression in the cortex, we performed bulk and single-cell accessible  
226 chromatin profiling (scATAC-seq, Fluidigm C1) along the differentiation time course from

227 pluripotency to 4 month organoids in human and chimpanzee (Fig. 5a). For the organoid  
228 time points, we enriched for dorsal telencephalon by using microdissected cortical regions  
229 as input for scATAC-seq (Extended Data Fig. 13). Aggregating the data from each single  
230 cell revealed a strong signal-to-noise ratio, and the organoid data was highly similar to bulk  
231 fetal brain DNase hypersensitivity<sup>39</sup> (Fig. 5b), and overlapped forebrain regulatory regions  
232 (Extended Data Fig. 13). Accessible regions were scanned for transcription factor binding  
233 motifs and k-mers (7 nucleotides in length) to identify features that differ among cells and  
234 correlate with accessibility variation<sup>40</sup>. These features were used to visualize cell similarity in  
235 a two-dimensional t-SNE projection, which separated iPS, EB, neuroectodermal,  
236 neuroepithelial, cortical neural progenitor (NPC) and neuronal cells in both human and  
237 chimpanzee (Fig. 5c; Extended data Fig. 13). We then ordered cells in pseudotime using  
238 diffusion maps, allowing us to monitor transcription factor binding motifs and chromatin  
239 accessibility dynamically over the differentiation path from pluripotency to cortical neurons  
240 (Fig. 5d; Extended Data Fig. 13-14). In this way, we found that the majority of genes not  
241 expressed in cerebral organoids have inaccessible promoters in organoids (Extended Data  
242 Fig. 13).

243 We next searched for differential accessibility (DA) between human and chimpanzee  
244 cortical NPCs and neurons. We identified 8,099 peaks (7.4% of all accessible peaks) that  
245 gained accessibility in humans relative to chimpanzee, whereas 9,836 peaks (9% of all  
246 accessible peaks) lost accessibility (Fig. 5e). Some of these peaks (2,219, 12.4% of DA  
247 peaks) are DA in both NPCs and neurons, however most are specific to either NPCs (9,659,  
248 53.8% of DA peaks) or neurons (6,057, 33.8% of DA peaks) and are enriched for various  
249 biological processes relative to all accessible organoid peaks (Fig. 5f). Notably, the majority  
250 of DA regions are specifically accessible in organoids relative to the earlier developmental  
251 stages (Fig. 5g) and many have been shown to drive reporter expression in the mouse  
252 developing forebrain (Extended Data Fig. 15)<sup>41</sup>. Consistent with other analyses of gene  
253 regulatory evolution<sup>42,43</sup>, most DA peaks are located in intergenic or intronic non-protein  
254 coding regions of the genome (Fig. 5h). The majority of genes that are differentially  
255 expressed between human and chimpanzee along the dorsal telencephalon trajectory have  
256 one or more human-chimp DA peaks nearby (63% of differentially expressed protein-  
257 coding genes, Fig. 5h). We indeed found that genes with differential expression between  
258 human and chimpanzee were significantly more likely to have a nearby differentially  
259 accessible region than genes that are not differentially expressed between the species  
260 (Extended Data Fig. 15, Kolmogorov–Smirnov test,  $p < 0.05$ ). DA peaks are also significantly  
261 enriched for single nucleotide changes (SNCs) that are fixed in all humans and distinct from  
262 chimpanzee and other primates<sup>44</sup> (Fig. 5i). Furthermore, these SNCs generate new or  
263 disrupt transcription factor binding sites for TFs that are expressed in organoids (Extended  
264 Data Fig. 15).

265 We annotated organoid-specific peaks that are DA between humans and  
266 chimpanzees and are nearby differentially expressed genes with various evolutionary  
267 signatures (Fig. 5j). This analysis identified potential regulatory regions that have human-  
268 derived fixed SNCs<sup>44</sup>, have undergone accelerated evolution in humans<sup>45-47</sup>, or overlap  
269 conserved regions that have been deleted in humans<sup>48</sup>. For instance, we identified 62  
270 human accelerated regions that overlap DA peaks (32 in human DA peaks, 30 in chimp DA  
271 peaks), with one of these sites being nearby a gene with human-specific expression. In this  
272 case, the potential regulatory region is 244 Kb away from cadherin 7 (CDH7), a gene with

273 higher expression specifically in human cortical neurons, and has increased accessibility in  
274 human neurons relative to chimpanzee and macaque (Fig. 5k). We also find DA regions  
275 nearby two genes, Ly6/PLAUR domain-containing protein 1 (LYPD1) and Ras-related C3  
276 botulinum toxin substrate 1 (RAC1), that have human-specific expression in NPCs and  
277 neurons, respectively. LYPD1 is involved in neurotransmitter receptor-binding and anxiety-  
278 related behaviors<sup>49</sup> and RAC1 is a GTPase involved in diverse processes including glucose  
279 uptake and cytoskeletal reorganization and genetic variants in this gene can lead to micro-  
280 or macrocephaly<sup>50</sup> (Extended Data Fig. 15). In addition, we identify 22 regions that are  
281 accessible in chimpanzee NPCs or neurons that are highly conserved in mammals, but the  
282 DNA has been deleted in humans (so-called human conserved deletion, hCONDELs)<sup>48</sup> and  
283 1 of these are located nearby a DE gene (FADS1, Supplementary Table 10).

284 Finally, we wanted to know if the human-specific gene expression patterns  
285 observed in the developing brain were stage-specific or if they persist into adulthood. We  
286 generated single-nucleus RNA-Seq data from postmortem prefrontal cortex tissue of three  
287 human, chimpanzee/bonobo and macaque individuals (50,035 in human, 33,847 in  
288 chimp/bonobo and 50,403 in macaque). We obtain spatial information by isolating nuclei  
289 from sequential sections sliced from basal to apical positions, which allows us to link cell-  
290 type specific differences to cortical layering (Fig. 6a)<sup>9</sup>. By integrating the species using  
291 canonical correlation analysis and clustering<sup>51</sup>, we recover expected cell classes such as  
292 excitatory and inhibitory neurons, astrocytes, oligodendrocytes, microglia and endothelial  
293 cells (Fig 6b-d). For our purposes, we focused on these broad cell classifications but note  
294 that subtypes could be more finely resolved and characterized (Extended Data Fig. 16).  
295 Different cell classes and cell types show distinct distribution along layers (Extended Data  
296 Fig. 16), which is consistent with previous reports<sup>9</sup>. Notably, we find that the portion of the  
297 transcriptome that is specific to neurons is more highly conserved based on sequence  
298 constraint than that of other cell types (Wilcoxon's rank sum test,  $P < 0.001$ , Fig 6e). Indeed,  
299 neuronal markers also show higher conservation than genes with higher expression in  
300 earlier pluripotent and progenitor states (Extended Data Fig. 16). Inhibitory neuron markers  
301 show slightly higher conservation than excitatory neuron markers in both adult brain and  
302 organoids (Fig. 6e and Extended Data Fig. 16), and inhibitory neurons in the adult cortex  
303 and organoid ventral telencephalon had fewer human-specific DE genes in comparison  
304 with excitatory neurons in the adult cortex and organoid dorsal telencephalon trajectory,  
305 respectively. We also find that astrocytes have slightly more differential expression than  
306 neurons or oligodendrocytes in adults (Fig. 6e,f; Extended Data Fig. 16). Together, these  
307 observations suggest different levels of evolutionary constraint on specific cell types in the  
308 cortex.

309 A substantial fraction of the genes expressed in dorsal and ventral telencephalic  
310 organoid neurons are also detected in excitatory and inhibitory neurons in the adult cortex,  
311 respectively (Fig. 6g,h). Notably, we find that 53 and 13 genes are commonly detected as  
312 DE in the organoid and adult excitatory and inhibitory neurons, respectively, compared to  
313 hundreds of genes that are specifically DE in the adult stage (Fig. 6i). Genes with human-  
314 chimp DE detected ubiquitously in the organoid dorsal telencephalon show stronger  
315 consistency with DE in adult excitatory neurons than genes with DE that is specific to either  
316 organoid NPCs or neurons, with NPC-specific DE genes having the weakest consistency in  
317 adult (Fig. 6j). In addition, DE genes restricted to organoids or adult show higher expression  
318 levels at the stage where DE is detected (Extended Data Fig. 16). There are interesting

319 examples of genes with human-specific DE in adult cell classes (Fig. 6k,l), including genes  
320 that are DE in developing and adult neurons, such as COL6A1 which has been shown to  
321 have a protective role limiting autophagy and apoptosis in aging neurons<sup>52</sup> and RIC3 which  
322 regulates the number and maturation of acetylcholine-gated ion channels in neurons<sup>53</sup>. We  
323 also find genes with human-specific DE in excitatory neurons showing significant layer  
324 specificity (Fig. 6l), suggesting their functions in specific subpopulations of cells at specific  
325 layer structures. Together, these analyses suggest that, with some exceptions, cortical cell  
326 type-specific transcriptome differences between human and chimpanzee are dynamic and  
327 linked to developmental stages.

328 To summarize, we identified patterns of dynamic gene expression and chromatin  
329 accessibility differences between human and chimpanzee cerebral organoid development  
330 from pluripotency through neuroepithelium, into multiple regions of the ape brain. We  
331 provide strong evidence that despite differences in brain region composition, gene  
332 expression patterns in the organoid forebrain are largely reproducible across iPSC lines  
333 from different individuals. We find that delayed maturation of the human brain begins  
334 during the very early stages of brain development. Moreover, we resolve differential gene  
335 expression to dynamic cell states upon the ontogenetic path from pluripotency to cortical  
336 neurons, and identify regulatory regions that could underlie human-specific innovations in  
337 gene expression. Finally, we map human-specific gene expression to cell types in the  
338 prefrontal cortex, and identify gene expression patterns that are specific to the adult brain,  
339 as well as patterns that can already be detected during development. The data generated  
340 in this study are available for exploration via a public interactive browser  
341 (<https://bioinf.eva.mpg.de/shiny/sample-apps/scApeX/>). Taken altogether, these data  
342 illuminate features of individual cell states that are uniquely human, and provides an  
343 extensive resource to guide exploration into the gene regulatory mechanisms that  
344 distinguish the developing human and chimpanzee brains.

345

#### 346 **AUTHOR CONTRIBUTIONS**

347 SK, MB grew organoids with assistance from AW, LS, MH. SK performed scRNA-seq and  
348 snRNA-Seq with assistance from MS. MB performed scATAC-seq. ZH, MB, and SK  
349 analyzed the data. FSC, MH performed immunohistochemical stainings. JF compared  
350 organoid scRNA-seq data to mouse voxel maps. PG dissected and sliced tissue for  
351 snRNA-Seq. DH and ZQ performed bulk RNA-Seq of adult tissue. SK, MB, ZH, BT, JGC  
352 designed the study, and wrote the manuscript with support from PK, WH, SP.

353

#### 354 **AUTHOR INFORMATION**

355 Conflict of interest: The authors declare no conflicts of interest. Correspondence and  
356 requests for materials should be addressed to [grayson.camp@iob.ch](mailto:grayson.camp@iob.ch),  
357 [barbara.treutlein@bsse.ethz.ch](mailto:barbara.treutlein@bsse.ethz.ch)

358

#### 359 **ACKNOWLEDGEMENTS**

360 We thank D. Wollny, A. Brazovskaya, K. Köhler, T. Schaffer, B. Schellbach, A. Weihmann,  
361 R. Schultz, I. Bünger, M. Dannemann, R. Snabel, B. Vernot, W. Hevers, M. Schörnig, J.  
362 Kelso of MPI-EVA, and K. Sekine of Yokohama University for their help with this project.  
363 We thank A. Fischer, M. Halbwx, K. Köhler, Anne Weigert and the Tchimpounga  
364 Sanctuary for support with generating the JoC iPSC line, Lea Berninger and Julia Peters  
365 (MPI-CBG, Dresden) for contributing Sc102a1 and SandraA organoids. Karyotyping was  
366 supported by the Stem Cell Engineering Facility, a core facility of CMCB at Technische  
367 Universität Dresden. Sorting was in part performed at the CUDZ at the veterinary medicine  
368 faculty at the University of Leipzig. This work was supported by the Max Planck Society  
369 (BT), Chan Zuckerberg Initiative (BT/JGC), and European Research Council (ANTHROPOID,  
370 JGC; ORGANOMICS; BT). SK was supported by the Boehringer Ingelheim Fonds.

371

### 372 **ACCESSION CODE**

373 The single-cell RNA-seq data is being deposited to EMBL-EBI ArrayExpress with the  
374 accession number E-MTAB-7552.



375 **FIGURES**

376

377

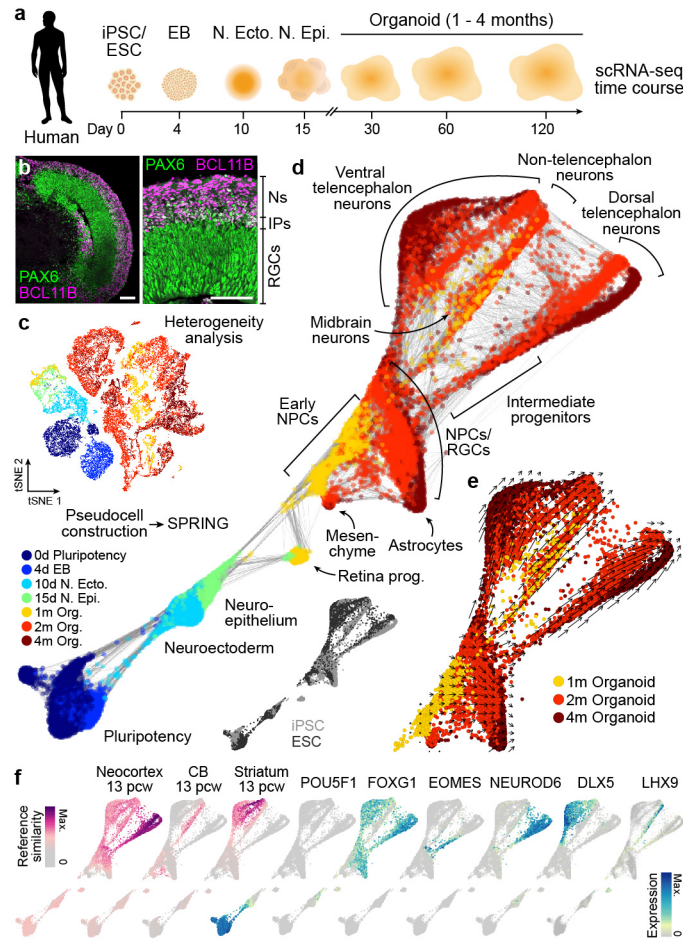

378

379 **Figure 1: Reconstructing human cerebral organoid differentiation from pluripotency.**

380 (a) scRNA-seq was performed on iPSC- and ESC-derived cells at different time points

381 during cerebral organoid differentiation from pluripotency. (b) Immunohistochemical

382 staining for PAX6 (green) and BCL11B/CTIP2 (pink) of a 63 day human organoid from iPSC

383 line 409b2 with a zoom into a cortical-like region (scale bars 100  $\mu$ m). (c) All time points

384 were combined and cell heterogeneity was assessed using t-distributed stochastic

385 neighbor embedding (tSNE). See Extended Data Fig. 2. (d) Pseudocells were constructed

386 by pooling nearest neighbors and the entire differentiation trajectory was reconstructed

387 using SPRING<sup>25</sup>. Pseudocells are colored by time point or cell line (inset). (e) Tracking

388 unspliced and spliced transcripts using RNA velocity<sup>28</sup> supports differentiation of progenitor

389 cells into distinct regions of the developing human brain. (f) Left, magenta colored, SPRING

390 plot colored by reference similarity spectrum (RSS) to bulk RNA-seq data generated from

391 diverse brain regions at different time points (Allen Brain Atlas). Shown are the tissues and

392 time points with maximum correlation. Right, cyan-blue colored, SPRING plot colored by

393 marker gene expression.

394

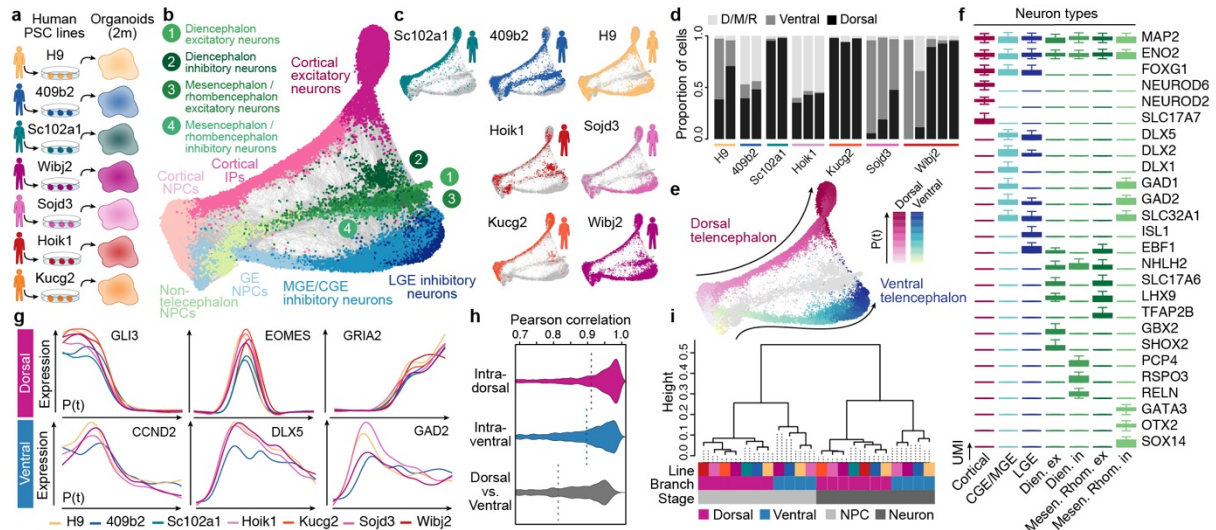

395  
396  
397  
398  
399  
400  
401  
402  
403  
404  
405  
406  
407  
408  
409  
410  
411  
412  
413  
414  
415  
416  
417  
418  
419  
420

**Figure 2: Assessing the reproducibility of gene expression patterns in the human organoid forebrain from iPSC lines from different individuals.** (a) To assess the reproducibility of gene expression patterns in organoids, scRNA-seq was performed on 2-month-old human organoids from 6 iPSC lines and 1 ESC (H9) line. (b-c) SPRING reconstruction based on the reference similarity spectrum (RSS) of organoid cells with plots colored by (b) cell types and by (c) line. (d) Proportion of cells per organoid that are within the dorsal telencephalon, ventral telencephalon, or diencephalon, mesencephalon and rhombencephalon neuronal branches. The data shows that there is variation in the types of cells that form in each organoid. (e) Pseudotime along the dorsal telencephalon and ventral telencephalon branch. (f) Boxplots (interquartile range with minimum and maximum, outliers removed) showing expression of marker genes for major neuron populations that emerge in the human cerebral organoids. CGE/MGE, caudal/medial ganglionic eminence; LGE, lateral ganglionic eminence; Dien. ex., diencephalon excitatory; Dien. in., diencephalon inhibitory; Mesen. Rhom. ex., Mesencephalon / rhombencephalon excitatory; Mesen. Rhom. in., Mesencephalon / rhombencephalon inhibitory. (g) Pseudotemporal expression patterns of neuronal differentiation markers for the dorsal (cortex, upper) and ventral telencephalon trajectories (lower) for each line. (h) Correlations of pseudotime-dependent gene expression patterns between cells within dorsal (upper) or ventral (middle) telencephalon branches, and between dorsal and ventral cells from the same line (lower). (i) Dendrogram based on pairwise correlations between cells from different lines/branches/stages based on pseudotime-dependent gene expression patterns. The clustering shows that differences between progenitors and neurons, as well as the variation between those cell types in different brain regions, are larger than variation between cell lines.

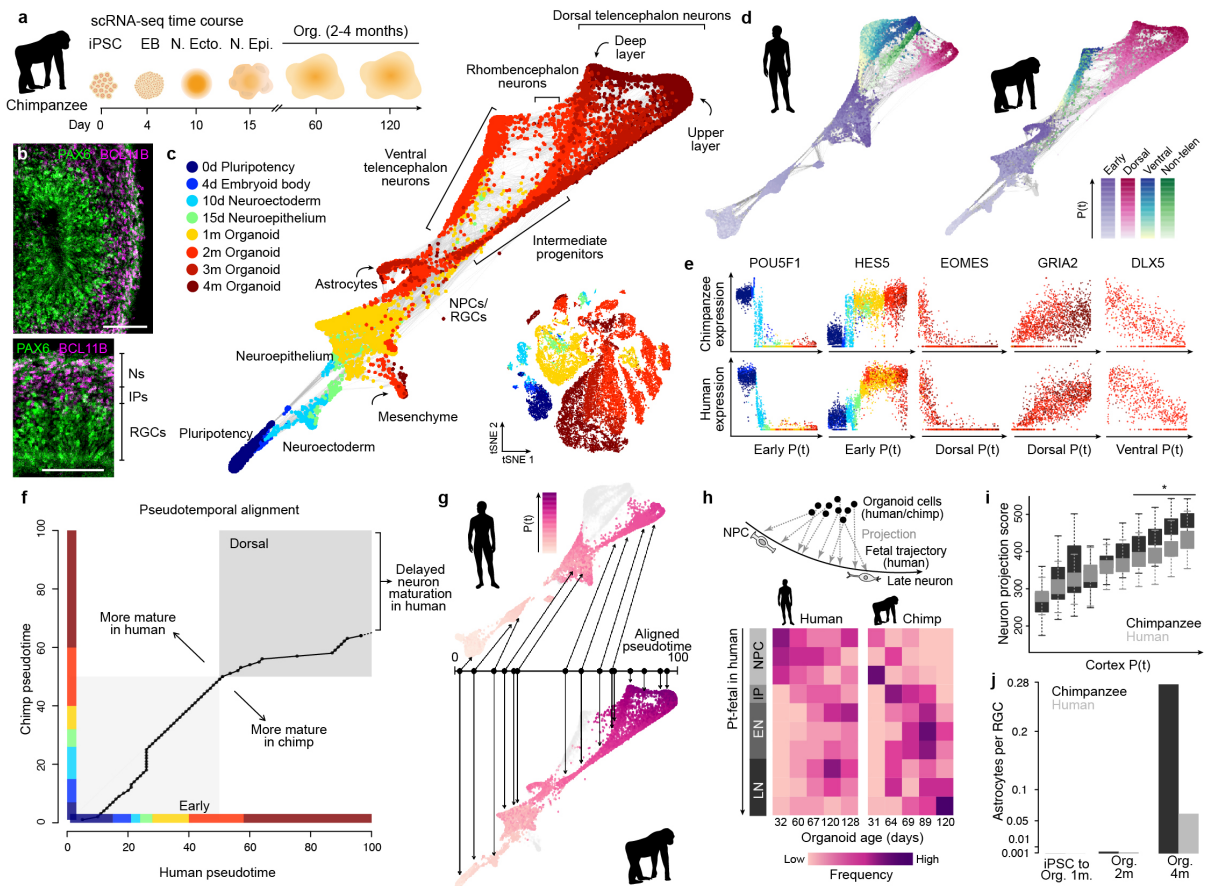

421  
422

423 **Figure 3: Chimpanzee cerebral organoid reconstructions reveal heterochrony in early**  
 424 **cortex development.** (a) scRNA-seq was performed on chimpanzee iPSC-derived cells at  
 425 different time points during cerebral organoid differentiation from pluripotency. (b)  
 426 Immunohistochemical staining for PAX6 (green) and BCL11B/CTIP2 (pink) of a 63-day  
 427 chimpanzee organoid from iPSC line SandraA with a zoom into a cortical-like region (scale  
 428 bars 100  $\mu$ m). (c) All time points were combined and cell heterogeneity was assessed using  
 429 tSNE (Extended Data Fig. 7). Pseudocells were constructed by pooling nearest neighbors  
 430 and the entire differentiation trajectory was reconstructed using SPRING. Cells and  
 431 pseudocells are colored by time point. (d) SPRING plots of human (left) and chimpanzee  
 432 (right), colored by stage and lineage pseudotimes. (e) Marker gene expression along  
 433 pseudotime trajectories in chimpanzee (upper) and human (lower). (f) Alignment of human  
 434 and chimpanzee pseudotimes after combining pseudocells from the early stages and the  
 435 dorsal forebrain lineage. The later chimpanzee pseudotime points fail to align with human  
 436 pseudocells. (g) SPRING plots of human (upper) and chimpanzee (lower) organoid  
 437 development, colored by the aligned pseudotimes with chimpanzee pseudotime as the  
 438 template. (h) Projection of human and chimpanzee organoid cells to human fetal brain data  
 439 reveals higher similarity of chimpanzee organoid cells to later stages of development  
 440 compared to human organoid cells. (i) Boxplots (interquartile range with minimum and  
 441 maximum, outliers removed) showing neuron projection scores defined as the sum  
 442 expression of genes related to neuron projection in human and chimpanzee along the  
 443 unaligned cortical pseudotimes. (j) Number of astrocytes captured by scRNA-seq in

444 organoids at different time points, normalized by the number of radial glia for each  
445 respective time point.



446

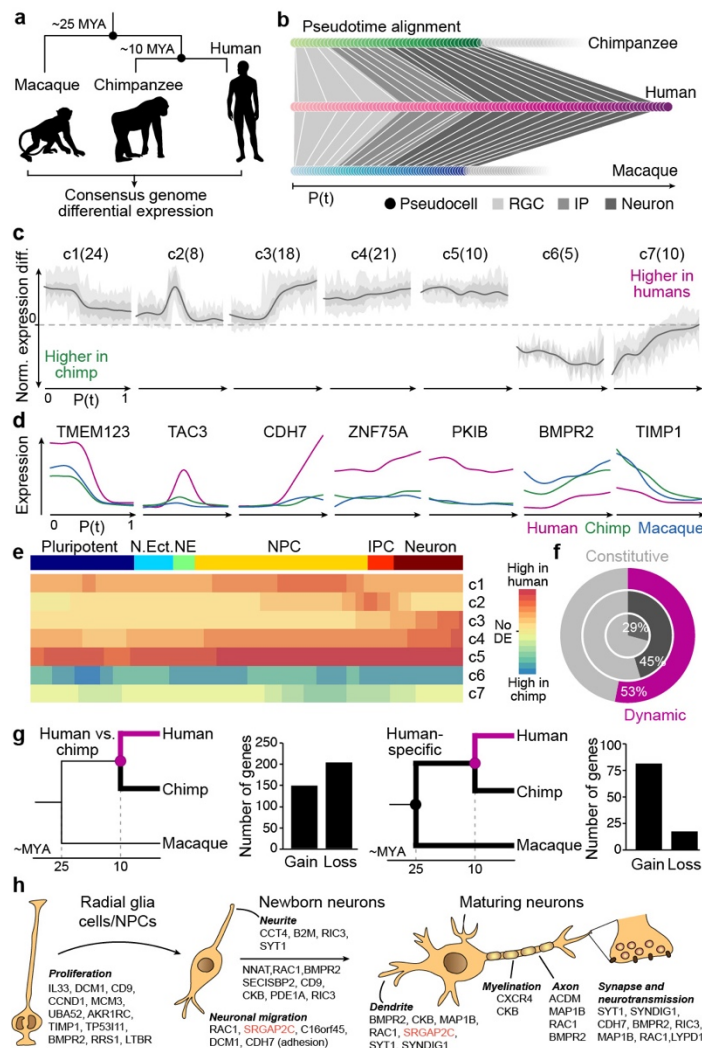

447

448

449

450

451

452

453

454

455

456

457

458

459

460

461

462

463

464

465

**Figure 4: Identification of human-specific changes in corticogenic gene expression.**

(a) scRNA-seq was performed on 2-4 month-old organoids from human, chimpanzee and macaque lines. Reads were aligned to a consensus genome, to analyze human-specific gene expression. (b) A schematic of time warping alignment of pseudotimes of the cortical progenitor to deeper layer neuron trajectories in human, chimpanzee and macaque in order to perform differential gene expression analysis. (c) Differential expression analysis of the aligned data reveals 7 clusters of genes with distinct human-specific pseudotemporal expression patterns. Average differential expressions of cluster genes are plotted over pseudotime for organoid dorsal forebrain pseudocells with 50% and 95% confidence intervals shown in dark and light grey, respectively. The number of genes per cluster are shown in parenthesis. (d) Pseudotemporal expression pattern of exemplary genes with human-specific expression changes for each of the 7 clusters, comparing human (pink), chimpanzee (green) and macaque (blue) expression. (e) Average human-chimpanzee differential expression patterns along the trajectory from pluripotent cells to cortical neurons shown for the 7 clusters of genes with human-specific pseudotemporal expression changes in organoid cells. (f) Proportions of genes with pseudotime-dependent (dynamic, dark) or constitutive expression patterns (grey), in all (inner), expression-controlled



466 background (middle) and human-specific differentially expressed (outer) genes. (g) Number  
467 of differentially expressed genes in a direct human vs. chimpanzee (left) or human vs.  
468 chimpanzee and macaque (right) comparison grouped by gain or loss of expression in  
469 humans. A gain of expression specifically in humans is more likely than a loss of expression  
470 pattern conserved in all primates. (h) Functional annotations of genes with human-specific  
471 expression patterns based on GO annotations related to brain development and  
472 neurogenesis. Only the human-specific DE genes with consistent human-chimpanzee or  
473 human-macaque DE detected in at least one of the three C1-based scRNA-seq data sets  
474 are shown (Extended Data Fig. 11). Human-specific duplicated genes are marked in red.  
475

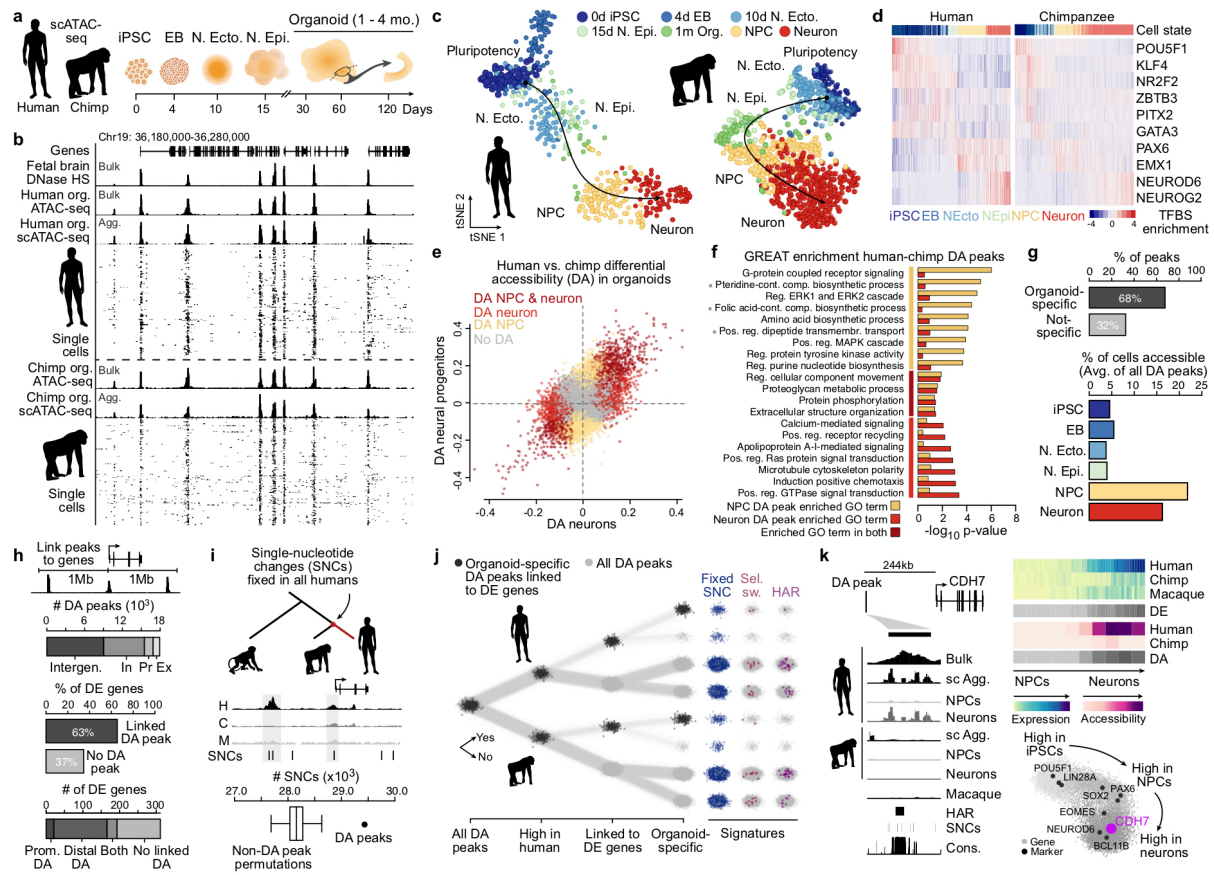

476  
477

478 **Figure 5: Single-cell ATAC-seq reveals dynamics of chromatin accessibility during**

479 **cortex development.** (a) scATAC-seq was performed at different time points of human and

480 chimpanzee cerebral organoid development from pluripotency to 4 month-old organoids.

481 For the organoid time points, microdissected cortical regions were used as input for

482 scATAC-seq. (b) Bulk, single-cell and aggregated (Agg.) single-cell ATAC-seq profiles from

483 2-to-4-month-old human and chimpanzee organoids at a representative locus. Data from

484 fetal brain DNase hypersensitivity is shown as a comparison. (c) t-SNE projections of

485 features that differ in accessibility among cells within scATAC-seq peaks per cell<sup>40</sup> from

486 human (left) and chimpanzee (right) with cells color coded by time point, and 2-4 month-old

487 organoid cells colored by cell state (NPC, neuron). (d) Heatmaps showing binding motif

488 enrichment for selected transcription factors (rows) in all cells (columns) ordered in

489 pseudotime for human (left) and chimpanzee (right). Pseudotime order was constructed

490 using diffusion maps (Extended Data Figure 14). (e) Scaled differential accessibility (DA)

491 between human and chimpanzee NPCs (y axis) and neurons (x axis). Positive values

492 represent DE higher accessibility in humans. Points represent DA peaks and are color

493 coded by their cell state specificity: NPC (gold), neurons (light red), or DA in both (dark red).

494 Barplot showing the enrichment of selected biological process gene ontology (GO) terms

495 associated with DA peaks between human and chimpanzee in NPCs (gold) or neurons (light

496 red) relative to all accessible organoid peaks. Gray dots next to a GO term name

497 indicate significantly enriched terms after multiple hypothesis test correction

498 (foreground/background hypergeometric test, FDR  $q < 0.05$  and 2-fold region-based

499 enrichment). (g) Top, barplot showing the percentage of human-chimp organoid DA peaks

500 that are accessible only at the cerebral organoid stage ("organoid-specific") or accessible

501 at the cerebral organoid stage and an earlier stage of differentiation (“not-specific”).  
502 Bottom, barplot showing the percentage of human cells from each cell state that are  
503 accessible at DA peaks. (h) A DA peak was linked to the nearest expressed gene if it fell  
504 within 1 Mb of that gene’s transcription start site. Top, stacked barplot shows the number  
505 of DA peaks located in exonic (Ex), promoter (Pr), intronic (In), or intergenic (Intergen)  
506 regions. Middle, barplot shows the percentage of DE genes linked with DA peaks. Bottom,  
507 stacked barplot shows the proportion of DE genes with a DA peak at the promoter region  
508 (Prom. DA), distal to the promoter region (Distal DA), at both promoter and distal regions  
509 (Both), or no linked DA peak. (i) Comparison of the number of single nucleotide changes  
510 (SNCs) derived and fixed in all humans overlapping DA peaks and non-DA peaks (randomly  
511 sampled to match the number and average accessibility of DA peaks). (j) DA peaks are  
512 annotated as accessible in human or chimp (first bifurcation: up, more accessible in human;  
513 down, more accessible in chimp), linked to a differentially expressed gene between human  
514 and chimp (second bifurcation: up, yes; down, no), or having specific expression in  
515 organoids relative to other time points during organoid development (third bifurcation: up,  
516 yes; down: no). On the right, sites are highlighted that show evolutionary signatures  
517 including fixed SNCs (blue), selective sweeps (pink) or human accelerated regions (HAR,  
518 purple). (k) Cadherin 7 (CDH7) has human-specific expression that is found in human  
519 neurons and has a nearby DA site that overlaps fixed SNCs and a HAR. Signal tracks are  
520 shown for human bulk organoid ATAC-seq (bulk), as well as aggregated scATAC-seq  
521 organoid cells (sc Agg.), and aggregated scATAC-seq for NPCs and neurons, respectively,  
522 for human and chimpanzee. Aggregated scATAC-seq data from macaque organoids are  
523 also shown. The bottom-right depicts a gene correlation network from the human cerebral  
524 organoid time course scRNA-seq data with CDH7 highlighted.  
525  
526

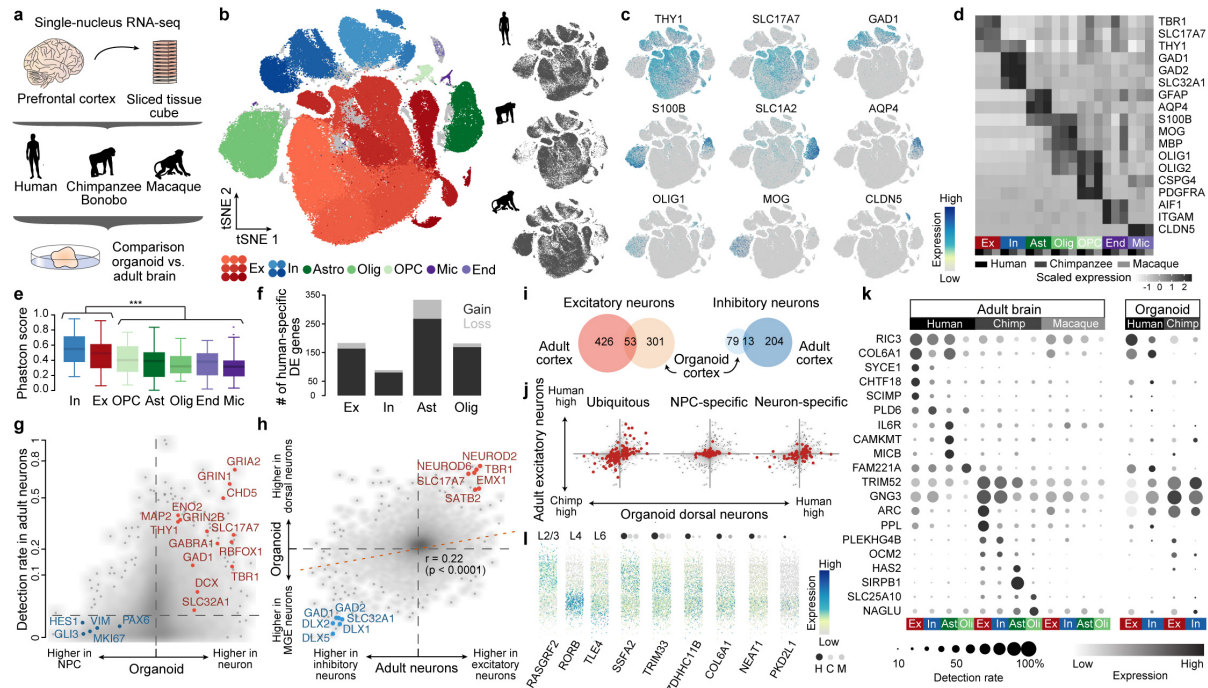

527

528 **Figure 6: Single-nucleus RNA-Seq of adult prefrontal cortex reveals shared and**  
 529 **distinct patterns of gene expression change from development to adulthood. (a)**

530 Single-nucleus RNA-Seq was performed on sliced tissue cubes dissected from adult frozen  
 531 prefrontal cortex tissue from human, chimpanzee/bonobo and macaque. (b) tSNE  
 532 clustering on CCA integrated data shows different subclasses of major cell classes present  
 533 in the different species. (c) Feature plots show expression of canonical marker genes for  
 534 major cell classes based on non-integrated expression values. (d) Average cluster  
 535 expression of canonical cell type markers separated by species reveal similar patterns of  
 536 marker gene expression for seven cell classes across species. (e) Genomic conservation  
 537 based on average phastCon scores of markers for seven cell classes (\*\*\*: two-sided  
 538 Wilcoxon's rank sum test,  $P < 0.0001$ ). (f) Number of genes with human-specific differential  
 539 expression in each of four major cell classes. Fractions with human-specific gain of  
 540 expression are shown in dark, and ones with human-specific loss of expression are shown  
 541 in light. (g) Detection rate in adult tissue of genes being differentially expressed between  
 542 NPCs and neurons in organoids. (h) Consistency of genes differing between dorsal and  
 543 ventral forebrain neurons from organoids and excitatory and inhibitory neurons in adult  
 544 tissue. (i) Overlap of genes with human-chimpanzee differential expression detected in  
 545 adult neurons and organoid trajectories. (j) Comparison of human-chimpanzee differential  
 546 expression in adult excitatory neurons and that in organoid dorsal neurons for the robust  
 547 DE genes detected in the organoid dorsal forebrain trajectory. Three categories of DE  
 548 genes are highlighted: ubiquitous DE in organoids (left), DE only in NPCs (middle) and DE  
 549 only in neurons (right). (k) Dotplot showing expression patterns and detection rates across  
 550 adult and organoid cell classes, for differentially expressed genes in adult cell classes. (l)  
 551 Predicted laminar expression patterns of six example human-specific DE genes in adult  
 552 excitatory neurons. Dots on top show their expression in excitatory neurons in the three  
 553 species, with sizes proportional to their detection rates and darkness showing their average  
 554 expression levels. Three non-DE canonical layer markers (RASGRF2 for layer 2, RORB for  
 555 layer 4, TLE4 for layer 6) are also shown.

## 556 **METHODS**

557

### 558 **Pluripotent stem cell lines and organoid culture**

559 We acquired 6 human induced pluripotent stem cell (iPSC) lines (Sojd3, Hoik1, Kucg2,  
560 Wibj2 from the HipSci resource<sup>54</sup>; h409b2 from the RIKEN BRC cell bank<sup>17</sup>; Sc102a1 from  
561 System Biosciences), one human ES cell line (H9, WiCell)<sup>55</sup>, three chimpanzee iPSC lines  
562 (SandraA<sup>19</sup>; PR818-5<sup>19</sup>, originally generated by the Gage lab and kindly provided to us by  
563 the R. Livesey group; JoC, generated in this study), one bonobo iPSC line (Bokela,  
564 generated in this study) and one ES macaque cell line (MN1<sup>18</sup>, kindly provided through the  
565 R. Livesey group from Eliza Curnow). The iPSC line JoC (chimpanzee, Tchimpounga  
566 Sanctuary) was reprogrammed from blood cells (primary lymphocytes) using plasmid based  
567 reprogramming<sup>56</sup> and Bokela (bonobo, Zoo Leipzig) was reprogrammed from fibroblasts  
568 using the StemMACS mRNA transfection kit (Miltenyi Biotec). Cell lines were validated for  
569 pluripotency markers by immunohistochemical stainings using the Human Pluripotent  
570 Stem Cell 3-Color Immunohistochemistry Kit (R&D Systems, SC021) and were  
571 differentiated into the three different germ layers using the Human Pluripotent Stem Cell  
572 Functional Identification kit (R&D Systems) and StemMACS Trilineage Differentiation Kit  
573 (Miltenyi Biotec). Karyotyping was carried out using Giemsa banding at the Stem Cell  
574 Engineering facility, a core facility of CMCB at Technische Universität Dresden, and  
575 karyotypes were found to be normal. Cell lines were cultivated using standard feeder-free  
576 conditions in mTeSR1 (StemCell Technologies) and StemMACS iPS-Brew XF (Miltenyi  
577 Biotec) on matrigel-coated plates and differentiated into cerebral organoids using a whole  
578 organoid differentiation protocol (Lancaster et al. 2014). iPS Brew was used for cultivation  
579 of macaque ESCs as well as for EB generation during organoid differentiation for these  
580 batches (Supplementary Table 1). Cell lines were regularly tested for mycoplasma using  
581 PCR validation (Venor GeM Classic, Minerva Biolabs) and found to be negative.

582

### 583 **Single-cell RNA-seq data generation**

584 A summary of all single-cell experiments can be found in Supplementary Table 1. For  
585 organoid experiments (1 month, 2 months, 3 months, 4 months), whole organoids were  
586 dissociated for generating single cell gene expression libraries. Briefly, organoids were  
587 transferred to HBSS (without Ca<sup>2+</sup> and Mg<sup>2+</sup>, -/-) and cut into two pieces to clear away  
588 debris from the center of the organoid (2-3 washes in total). Organoid pieces were then  
589 dissociated using Neural dissociation kit (P) using Papain-based dissociation (Miltenyi  
590 Biotec). Organoid pieces were incubated in Papain at 37 °C (enzyme mix 1) for an initial 15  
591 min. followed by addition of Enzyme A (enzyme mix 2) to the Papain mix. Organoid pieces  
592 were then triturated using wide bore 1000ml tips and incubated for additional intervals of 5-  
593 10 min with triturations between the incubation steps, amounting to a total Papain  
594 incubation time of approximately 45 min. Cells were filtered through a 30 µm strainer and  
595 washed, centrifuged for 5 min at 300xg and washed 3 times with HBSS (-/-). Cells were  
596 then analyzed using Trypan Blue assay, counted using the automated cell counter  
597 Countess (Thermo Fisher), and diluted for an appropriate concentration to obtain  
598 approximately 6000 cells per lane of a 10X microfluidic chip device. Typically, cells from  
599 one organoid were loaded per lane in the microfluidic device, and in some cases organoids  
600 from different lines were pooled onto the same lane and demultiplexed based on single-



601 nucleotide polymorphisms. For 1 month organoids, three pooled 409b2 and one H9  
602 organoid were dissociated and cells from the two cell lines were mixed at equal ratios to be  
603 loaded on the chip. For as set of 2 month HipSci organoid data, organoids were  
604 dissociated for all four HipSci cell lines and pooled at equal ratios to be loaded on one lane  
605 of the microfluidic device aiming for 10k cells. Fluidigm C1 data (Supplementary table 1)  
606 were generated as previously described<sup>19</sup> and cells from chimpanzee SandraA 75d  
607 organoids were microdissected regions from vibratome slices for which single cell  
608 suspensions were generated as described above. Single cells were then sorted into 96-well  
609 plates using a FACS Aria III sorter and further processed using the SmartSeq2 protocol<sup>57</sup> to  
610 generate cDNA and the NexteraXT kit (Illumina) to generate sequencing libraries. All  
611 libraries (10X and Fluidigm C1/SmartSeq2) were sequenced on Illumina's HiSeq2500  
612 platform in paired-end mode (100 bp Fluidigm C1/SmartSeq2; 26+8bp, 100bp 10x).

613

### 614 **Early stages of organoid differentiation (iPS cells to neuroepithelium)**

615 For iPSC/ESC single-cell experiments, cells were detached from cell culture dishes using  
616 TrypLEExpress (Thermo Fisher) incubation for 5 min. followed by addition of mTeSR1. Cells  
617 were centrifuged for 5 min. at 200xg and resuspended in mTeSR1, filtered through a 20  $\mu$ m  
618 strainer and washed with mTeSR1. Cells were then centrifuged again for 5 min. at 200xg  
619 and resuspended in mTeSR1, counted, diluted to the same concentration and mixed at  
620 equal ratios for the three cell lines to be loaded on the 10X microfluidic chip aiming for  
621 10,000 cells. Thirty embryoid bodies (EBs), 15 neuroectoderms, and 1-3 neuroepithelium of  
622 each cell line were pooled for each dissociation, respectively. Cells were obtained by  
623 papain dissociation as described above for organoid dissociation, with slightly shorter  
624 incubation times in enzyme mix 1 (approximately 30 min.). For 10X experiments, cells from  
625 the three different cell lines were diluted and mixed at equal ratios to be loaded on the  
626 microfluidic chip device.

627 Single-cell experiments were conducted using the 10X Chromium Single Cell 3' v2  
628 Kit following the manufacturer's instructions. Briefly, cells were mixed with reverse  
629 transcription mix, gel beads and oil were loaded on the chip device to be coencapsulated  
630 into droplets, which underwent first strand cDNA synthesis thereby tagging mRNAs with a  
631 unique molecular identifier (UMI) and a unique cell barcode. All following steps were  
632 conducted in bulk by breaking the droplets and cleaning up and amplifying the cDNA.  
633 Single-cell libraries were then constructed by fragmentation, end repair and adapter ligation  
634 and amplification using library specific index sequences as provided by 10X Genomics.  
635 Quantification and quality control of libraries was performed using High Sensitivity DNA  
636 assays for Agilent's Bioanalyzer and sequenced on a HiSeq2500 in Rapid or HighOutput  
637 sequencing mode. Typically, one 10X library was sequenced on one lane of a sequencing  
638 flow cell, with the exception of the HipSci organoids for which three pooled libraries (each  
639 library contained pooled cells from four dissociated HipSci organoids from different cell  
640 lines) were sequenced on two lanes of a flow cell. See Table S1 for more details.

641

### 642 **Immunohistochemistry**

643 Organoids were washed in PBS prior to fixing in 4% PFA for 2-4 hours (h). The excess of  
644 fixative was removed with three PBS washes and organoids were then transferred to a  
645 30% sucrose solution for 24-48 h for cryoprotection. Finally, organoids were transferred to  
646 plastic cryomolds (Tissue Tek) and embedded in OCT compound 4583 (Tissue Tek) for

647 snap-freezing on dry ice. For immunohistochemical stainings, organoids were sectioned in  
648 slices of 20  $\mu\text{m}$  thickness using a Leica CM3050 S cryostat and Microm HM 560 (Thermo  
649 Fisher Scientific) at  $-15$  to  $-20^\circ\text{C}$ . Organoid sections were quickly washed in PBS to remove  
650 any residual OCT. Then, sections were incubated in antigen retrieval solution (HistoVT One,  
651 Nacalai Tesque) at  $70^\circ\text{C}$  for 20 min. Excess solution was washed away with PBS and the  
652 tissue was incubated in blocking-permeabilizing solution (0.3% Triton, 0.2% Tween-20 and  
653 5% Normal Goat Serum in PBS) for 1h at room temperature. Afterwards, sections were  
654 incubated overnight at  $4^\circ\text{C}$  in blocking-permeabilizing solution containing antibodies anti-  
655 PAX6 (mouse, 1:1000, Thermo Fisher Scientific, MA1-109; rabbit, 1:300, Covance, PRB-  
656 278P) and anti-CTIP2 (rat, 1:1000, Abcam, AB18465), anti-SATB2 (rabbit, 1:500, Abcam,  
657 Ab92446; mouse, 1:500, Abcam, Ab51502), anti-Tbr2 (mouse, 1:500, MPI-CBG Antibody  
658 Facility<sup>35</sup>). On the next day, sections were rinsed three times in PBS before incubation for  
659 1h at room temperature in secondary antibody solution, which contained blocking-  
660 permeabilizing solution, DAPI (1:3000), Alexa Fluor 488-conjugated anti-rabbit antibody  
661 (goat, 1:1000, Thermo Fisher, A11008), Alexa Fluor 546-conjugated anti-mouse antibody  
662 (goat, 1:500, Thermo Fisher Scientific, A-21123), Alexa Fluor 647-conjugated anti-rat  
663 antibody (goat, 1:500, Thermo Fisher Scientific, A-21247) and Alexa Fluor 488-conjugated -  
664 anti-mouse (A21202) and anti-rat antibody (A21208), Alexa Fluor 555-conjugated anti-rabbit  
665 antibody (A31572), Alexa Fluor 647-conjugated anti-mouse antibody (A31571) (all donkey-  
666 derived, 1:500, Molecular Probes). Finally, remainders of secondary antibody solution were  
667 washed off with PBS before covering with ProLong Gold Antifade Mountant medium  
668 (Thermo Fisher Scientific). Stained organoid cryosections were imaged using a confocal  
669 laser scanning Olympus Fluoview FV1200 microscope and Zeiss LSM 880 Airy upright  
670 microscope. Whole-section tilescans composed of 3 different z-plane images (z-step = 5-8  
671  $\mu\text{m}$ ) were acquired using a 10X magnification objective, Plan-Apochromat 10x/0.45 M27  
672 and Plan-Apochromat 20x/0.8 M27 objectives. Images were then stitched, stacked and  
673 further processed using the Olympus Fluoview 4.2b software and ImageJ (Fiji).

674

### 675 **Single cell RNA-seq data preprocessing**

676 We used Cell Ranger, the set of analysis pipelines suggested by 10X Genomics, to  
677 demultiplex raw base call files to FASTQ files and align reads to the human genome and  
678 transcriptome (hg38, provided by 10X Genomics) with the default alignment parameters.  
679 Pooled samples, including samples from different species or human lines, were then  
680 demultiplexed using a two-step procedure based on the read mapping results. In the first  
681 step, the genome alignment between human (hg38) and chimpanzee (panTro5) was  
682 downloaded from UCSC Genome Browser. Sites with diverged bases between human and  
683 chimpanzee were obtained based on the genome alignment. Reads covering the species-  
684 diverged sites were collected for each reported cell, with the number of bases matching  
685 each species counted. Cells with more than 80% reads covering the species-diverged sites  
686 matching with one species were assigned as cells from the species. For those samples  
687 with human cells from different lines pooled, a second step of demultiplexing was done  
688 using demuxlet<sup>58</sup>, based on the genotyping information of lines downloaded from HipSci  
689 websites (Kucg2, Wibj2, Hoik1, Sojd3) or called using bcftools based on the unpooled  
690 scRNA-seq data (H9, 409b2). Cells with the best singlet likelihood no less than 50 higher  
691 than the second best singlet likelihood and estimated mixture ratio less than 30% were

692 labeled as their best-matched lines. All cells failing to pass any of the above threshold were  
693 classified as doublets and excluded from the following analysis.

694 Seurat<sup>59</sup> was then applied for further data processing. Cells with more than 6,000  
695 or less than 200 detected genes, as well as those with mitochondrial transcripts proportion  
696 higher than 5% were excluded. After the log-normalization, confounding factors including  
697 the number of detected genes and proportions of mitochondrial transcripts were also  
698 regressed out. Highly variable genes were then obtained as genes with dispersion higher  
699 than 0.5 and normalized expression level between 0.0125 and 3, followed by principal  
700 component analysis (PCA) based on the z-transformed expression levels of the identified  
701 highly variable genes (Supplementary Table 2). The top-20 PCs were used to do clustering  
702 using Seurat. Additional quality controls of the measured cells were based on primary cell  
703 type predictions by using public human fetal brain scRNA-seq data (Nowakowski data  
704 set)<sup>27</sup>. In brief, a Lasso logistic regression model was built, using gene expression ranks of  
705 the Nowakowski data set as the training set, to predict the primary cell type identity of each  
706 single cell in two-month-old and four-month old organoids. Cells which were predicted to  
707 be of 'glycolysis' identity were excluded, so as cells in the Seurat clusters where more than  
708 80% of cells were predicted as of 'glycolysis' identity. Heterogeneity analysis of human  
709 (Extended Data Figure 1, Extended Data Figure 2, Supplementary Tables 3 and 4) and  
710 chimpanzee (Extended Data Figure 6, Supplementary Tables 5 and 6) full lineage data was  
711 performed using t-stochastic neighbor embedding based on the top principal components  
712 identified (top 20 PCs for human, top 15 PCs for chimpanzee). Cluster identities were  
713 assigned based on cluster gene markers (Supplementary Table 6) as determined by  
714 FindAllMarkers function in Seurat (min percentage of cells expressed = 0.25 and log fold  
715 change threshold = 0.25) and gene expression of known marker genes. For human data,  
716 cells from 409b2 and H9 and were integrated using canonical correlation analysis (CCA) as  
717 implemented in Seurat (v3). Briefly, data were normalized and the top 2000 highly variable  
718 genes for 409b2 and H9 cells were determined using the vst method. The datasets were  
719 integrated based on the top 20 CCs using the Seurat method by identifying anchors and  
720 integrating the datasets. The resulting integrated data were scaled and principal component  
721 analysis was performed. Clustering was performed based on the top 20 PCs and using a  
722 resolution of 0.6. Feature plots show non-integrated expression values. Cluster markers  
723 were determined using Wilcoxon test considering only genes that show a minimum log fold  
724 expression change of 0.25 in at least a fraction of 0.25 of cells in the clusters using the non-  
725 integrated expression values.

726  
727

### 728 **Reference similarity spectrum (RSS) and construction of pseudocell transcriptomes**

729 The reference similarity spectrum (RSS) of one cell to the Human Developing Brain (HDB)  
730 atlas was defined as the normalized similarity between gene expression levels of the cell  
731 and gene expression levels of each of the 237 fetal samples with RNA-seq data in the  
732 BrainSpan database in Allen Brain Atlas (Extended Data Fig. 3). To increase discrimination  
733 of different reference samples, only the highly variable genes of the HDB data set (see  
734 Supplementary Table 2), defined based on expression variation-mean comparison of the  
735 reference data set, were used for the RSS calculation. Between each cell and each sample  
736 in the HDB data set, Pearson correlation coefficient (PCC) was calculated across the HDB-

737 highly variable genes. Z-transformation was then applied to PCCs between each cell to the  
738 237 fetal HDB samples to get the normalized similarities.

739 To construct pseudocells, single cells were firstly grouped based on their sample  
740 sources and Seurat clusters. Within each group of cells, i.e. those cells from the same  
741 sample and in the same Seurat cluster, cells were selected randomly with a selection  
742 probability of 20%. The selected cells were called pseudocell seeds or territory capitals  
743 (Extended Data Fig. 3). The ten nearest neighbors (NN) of each seed, based on Euclidean  
744 distances of the top-20 PCs, were then assigned to the seed, forming a pseudocell  
745 territory. If one cell was assigned to multiple pseudocell territories, one territory was chosen  
746 randomly. The expression level of one gene in each pseudocell was then calculated as the  
747 average gene expression level across cells in the pseudocell territory.

748

#### 749 **Visualization, lineage identification and pseudotime estimation of pseudocells for** 750 **reconstructing human cerebral organoid differentiation from pluripotency**

751 First, PCA was applied to a pseudocell expression matrix using the z-transformed  
752 expression levels of the highly variable genes as input. Euclidean distance between the top  
753 10 PCs of each pair of pseudocells was calculated and a KNN-network (K=100) was then  
754 calculated with the constraint to only consider pseudocells from the same or nearby stages  
755 when screening for nearest neighbors. The kNN-network was visualized using SPRING<sup>25</sup>.  
756 To construct the pseudotime course of human cerebral organoid differentiation from  
757 pluripotency, the Walktrap community identification algorithm (implemented in the R  
758 package igraph) was applied to the above kNN-network to identify network communities.  
759 The resulting communities were manually aggregated into four groups to minimize  
760 branches in each group. A diffusion map algorithm (implemented in R package destiny<sup>60</sup>)  
761 was applied to pseudocells in each of the four groups, with the expression levels of the  
762 highly variable genes of pseudocells as the input. The ranks in DC1 were used as the  
763 pseudotimes. We used an F-test based ANOVA analysis to identify genes with pseudotime-  
764 dependent expression patterns. In brief, we established a natural splined linear regression  
765 model (ns function in the R package splines) with six degrees of freedom (df), with  
766 expression levels as the response variable and pseudotimes as the independent variable,  
767 for each of the highly variable genes. An F-test was applied, to compare variation explained  
768 by the splined linear model with that of the residuals normalized by degrees of freedom.  
769 Bonferroni correction was performed across tested genes, with a corrected p-value  
770 threshold 0.01 to identify genes with pseudotime-dependent expression. The analysis was  
771 applied to the four groups of pseudocells separately.

772

#### 773 **Visualization, lineage identification, pseudotime estimation of cells in human two-** 774 **month-old cerebral organoids from different individuals**

775 Pseudocells were constructed for the human two-month-old organoids as above with  
776 constraint on samples and based on cells with predicted primary cell types as one of radial  
777 glia, intermediate progenitor (IPC), excitatory neuron, and inhibitory neuron. RSS to the  
778 BrainSpan fetal samples was calculated for each pseudocell, with distance between two  
779 pseudocells defined as the correlation distance between RSS of the two pseudocells. The  
780 kNN-network (k=20) was then constructed and SPRING was used to determine coordinates  
781 of pseudocells for visualization. To further discriminate pseudocells representing different  
782 neuronal lineages, a Walktrap algorithm for network community identification was applied



783 to the RSS-based kNN-network ( $k=100$ ). Communities that were significantly connected  
784 and showing concordant marker expression or similarity spectrum were aggregated, which  
785 resulted in three progenitor-to-neuron trajectories. Based on gene expression level ranks of  
786 cells in the three defined trajectories, two Lasso logistic regression models were trained,  
787 one for classification of cortical and ventral lineage, while the other one for classification of  
788 all the three trajectories. The first model was applied to pseudocells in the community C6  
789 which was significantly connected to cortical and ventral trajectories, while the second  
790 model was applied to pseudocells in the community C4, which was significantly connected  
791 with both the non-telencephalon pseudocells and community C4. With a unique lineage  
792 label defined for each pseudocell, a  $1 \times 500$  self-organizing-map (SOM) model was trained  
793 for each of the three trajectories, using RSS of pseudocells within the lineage as the  
794 training data. The index of neuron that one pseudocell was assigned to was used as its  
795 pseudotime. Diffusion map analysis was also applied to pseudocells at each trajectory,  
796 with highly variable gene expression as the input, with ranks of DC1 defined as alternative  
797 pseudotime of pseudocells. Pseudotimes obtained by the two methods are highly  
798 correlated (Spearman correlation is 0.91 and 0.92 for the dorsal and ventral telencephalon  
799 trajectories, respectively).

800 To project the single-cell data to the cell embedding space that was defined for  
801 pseudocells, two support vector regression (SVR) models (implemented in the R package  
802 e1071), each of which was for one dimension of the embedding, were trained using RSS of  
803 pseudocells as the training set. The trained models were applied to RSS of single cells for  
804 their predicted coordinates. Such coordinates were further refined by pushing each cell to  
805 its nearest pseudocell with smallest correlation distance of RSS to be 70% closer.  
806 Similarly, a support vector machine (SVM) model was trained (implemented in the R  
807 package e1071) using RSS of pseudocells for the three trajectories, and applied to RSS of  
808 single cells for their lineage identity. After that, the corresponding SOM model for  
809 pseudotime estimation was applied to RSS of each single cell for its estimated pseudotime.

810

### 811 **Dynamic time warping (dtw)-based alignment of pseudotime courses**

812 We used a dynamic time warping algorithm to align different pseudotime courses. In brief,  
813 each pseudotime course was evenly broke into 50 blocks. Average gene expression levels  
814 of pseudocells or cells within each block was calculated. Pairwise distances between  
815 blocks from the two courses were calculated as the Pearson correlation distance, i.e. 1-  
816 PCC, across the highly variable genes in cells of both pseudotime courses. Suppose  $d_{i,j}$   
817 represents the distance between the  $i$ -th block in the reference pseudotime course and the  
818  $j$ -th block in the query pseudotime course. We defined  $D$  as the alignment distance matrix,  
819 where

$$820 \quad D_{i,j} = \min(D_{i-1,j}, D_{i,j-1}, D_{i-1,j-1}) + d_{i,j}$$

821

822 A trace-back procedure was then performed to get the alignment. Three modes of  
823 alignment were implemented. In the first mode, the 'fixed-end' alignment, the initialization  
824 of  $D$  was done as:

$$825 \quad D_{i,j} = \begin{cases} d_{i,1}, & \text{if } j = 1 \\ D_{1,j-1} + d_{1,j}, & \text{if } i = 1 \end{cases}$$

826

827 In the other two modes, the 'fixed-start' and 'end-to-end' alignments,  $D$  was initialized as:



828

829

$$D_{i,j} = \begin{cases} d_{1,1}, & \text{if } i = 1 \text{ and } j = 1 \\ D_{1,j-1} + d_{1,j}, & \text{if } i = 1 \\ D_{i-1,1} + d_{i,1}, & \text{if } j = 1 \end{cases}$$

830

831 In the trace-back step, a 'fixed-end' and 'end-to-end' alignment was started from  $D_{M,N}$ ,  
832 where M and N are the numbers of blocks at the reference and query pseudotime courses,  
833 respectively. On the other hand, the trace-back step was started from  $D_{m,N}$ , where  $m =$   
834  $\text{argmin}_i(D_{i,N})$ . In our study, the 'fixed-end' alignment was used to align the cortical and  
835 ventral lineage pseudotime course of human organoid cells; the 'fixed-start' alignment was  
836 used to align pseudotime courses of human and chimpanzee cortical pseudocells; the  
837 'end-to-end' was used in the truncated alignment of pseudotime courses of different  
838 species.

839

### 840 **Reconstruction of chimpanzee cerebral organoid differentiation from pluripotency**

841 We applied a similar procedure as mentioned above describing the reconstruction of  
842 human cerebral organoid differentiation from pluripotency to reconstruct the organoid  
843 differentiation trajectory from chimpanzee single-cell RNA-seq data. In brief, the single-cell  
844 RNA-seq reads were mapped to the human-chimpanzee-macaque consensus genome and  
845 counted using Cell Ranger. Seurat was used for further preprocessing including gene  
846 expression normalization, confounding factor regression, PCA and clustering. Cells from  
847 organoid samples with predicted primary cell type identity of 'glycolysis', as well as cells  
848 within clusters with more than 80% cells having 'glycolysis' identity, were excluded.  
849 Pseudocells were then constructed with a seed selection probability of 20% and  
850 constraints on samples and Seurat clusters. PCA was applied to expression levels of highly  
851 variable genes across pseudocells, and pairwise distances of pseudocells were calculated  
852 as the Euclidean distances between the top-10 PCs. The kNN network (k=100) of  
853 pseudocells was constructed, linking every pseudocell with its 100-nearest pseudocells  
854 representing the same or nearby stages. Three-month-old and four-month-old organoids  
855 were seen as the same stage. The Walktrap network community identification algorithm  
856 was applied and the resulted community labels (walktrap communities) of pseudocells were  
857 compared with the predicted community labels (projected communities) based on a Lasso  
858 logistic regression model trained by ranks of gene expression levels of the human  
859 pseudocells representing the human organoid differentiation from pluripotency as  
860 described above. Any walktrap community with < 1000 kNN connections with other  
861 communities was discarded. One of the four labels: early, cortical, ventral, non-  
862 telencephalon was assigned to one walktrap community if more than 95% of pseudocells  
863 within the community were from the same group according to their projected communities.  
864 For one community with more than 10% of pseudocells with projected communities  
865 belonging to both ventral and midbrain-hindbrain groups, the non-telencephalon label was  
866 only assigned to pseudocells with projected communities in the non-telencephalon group.  
867 The diffusion map algorithm was applied to each of the four pseudocell groups, using the  
868 expression levels of highly variable genes as input, to estimate their pseudotimes. For the  
869 cortical, ventral and midbrain-hindbrain groups, the ranks of DC1 was used as the  
870 pseudotimes. For the early group, a principal curve (implemented in the R package

871 princurve) was fitted in the DC1-DC2 space. The order of pseudocells projecting to the  
872 resulted principal curve was used as the pseudotimes.

873

#### 874 **Human-chimpanzee-macaque consensus genome**

875 The construction of the consensus genome was performed using the procedure as  
876 described<sup>9,61</sup>. In brief, the chained and netted pairwise genome alignments of the human  
877 (hg38) and chimpanzee (panTro5) genomes, and the human and macaque (rheMac8)  
878 genomes, were downloaded from UCSC Genome Browser. Based on the downloaded  
879 pairwise genome alignments, a multiple genome alignment of human-chimpanzee-  
880 macaque was constructed using multiz. Based on the human-chimpanzee-macaque  
881 genome alignment, we constructed the consensus genome by masking all discordant sites  
882 including mismatches, insertion/deletion (indels), as well as 6-bp flanking regions of indels  
883 on the human genome. The obtained consensus genome was indexed with gene  
884 annotation in GENCODE v27 for read mapping to the consensus genome with Cell Ranger.

885

#### 886 **Pseudotime estimation of cerebral organoid cells in different species**

887 Single cell RNA-seq data of organoids with ages from two-month-old to four-month-old in  
888 human, chimpanzee, and macaque were mapped to the human-chimpanzee-macaque  
889 consensus genome and counted using Cell Ranger. Further preprocessing using Seurat  
890 was applied separately for data from the three species. Only cells with predicted primary  
891 cell type identities as radial glia, intermediate progenitors, excitatory neurons, or inhibitory  
892 neurons were included in the later analysis. Pseudocells were constructed for humans and  
893 chimpanzees, both with a coarse grain ratio of 20% and constraints on samples and Seurat  
894 clusters. The RSS to the HDB data set was calculated for each pseudocell, and the SVM  
895 model for lineage estimation was applied to estimate the lineage identity of each  
896 pseudocell. Focusing on the cortical lineage, a diffusion map analysis was applied to  
897 cortical pseudocells of the three species, respectively. The ranks of DC1 were used as the  
898 pseudotimes of the pseudocells. In macaque, similar procedure was applied directly to  
899 single cells without pseudocell construction.

900

#### 901 **Truncated dtw-based alignment of pseudotime courses representing neural** 902 **progenitors and deeper layer neurons in different species**

903 We used the first DC discriminating BCL11B+ and SATB2+ cortical neurons (DC3 in  
904 chimpanzee, DC4 in macaque) to identify upper layer (UL) neurons, as the pseudocells in  
905 the branch with highest expression level of SATB2. To identify potential upper layer  
906 neurons in human, we first retrieved markers of upper and deeper layer (DL) excitatory  
907 neurons<sup>27</sup>. The sum expression levels of UL and DL markers was then calculated for each  
908 pseudocell in human and chimp, with the UL-specificity score ( $s_{UL}$ ) being defined as the  
909 UL/DL markers expression ratio. The distribution of  $s_{UL}$  in UL neurons in chimpanzee was  
910 used to determine the threshold to discriminate UL neurons from other cell types ( $s_{UL} > 0$ ).  
911 All UL neurons in the three species were excluded from the following analysis.

912 To correct for the DL neuron maturation timing differences between human and  
913 the other two species, a two-step pseudotime course alignment strategy was used. The  
914 first step, namely the trimming step, aims to determine the pseudotime points in  
915 chimpanzee and macaque which correspond to the latest pseudotime point in human. In  
916 brief, an SVR model with Gaussian-kernel was firstly constructed, with chimpanzee or

917 macaque pseudotimes as the response variables and the RSS as the dependent variables.  
918 Two models were trained with the chimpanzee pseudocells and macaque cells  
919 respectively, and applied to the human pseudocells to predict their corresponding  
920 chimpanzee and macaque pseudotime points. Two constrained B-splines regression  
921 models ( $F_{HC}$ ,  $F_{HM}$ ) were then fitted (implemented in the R package *cobs*): human  
922 pseudotimes of human pseudocells ( $t_h$ ) versus their predicted chimpanzee ( $\hat{t}_c$ ) or macaque  
923 ( $\hat{t}_m$ ) pseudotimes, with constraints of  $F_{HC}(t_h = 0) = F_{HM}(t_h = 0) = 0$ .  $F_{HC}(t_h=1)$  and  $F_{HM}(t_h=1)$   
924 were used as the pseudotime thresholds to select chimpanzee pseudocells and macaque  
925 cells. Chimpanzee DL neurons with pseudotime  $t_c > F_{HC}(t_h=1)$ , as well as macaque DL  
926 neurons with pseudotime  $t_m > F_{HM}(t_h=1)$ , were excluded in following analysis. The second  
927 step, namely the alignment step, was then applied to the remaining pseudotime courses of  
928 the three species. An 'end-to-end' dtw-based alignment, as described above, was used to  
929 align the human pseudotimes with pseudotimes of each of the other two species using the  
930 human pseudotime course as the template.

931

### 932 **Conserved developmental trajectories from NPCs to neurons in primates**

933 Genes with pseudotime-dependent expression changes in organoids were identified in  
934 each of the three species, using the F-test based ANOVA analysis as described above.  
935 Those genes with significant pseudotime-dependent expression changes (BH-corrected  
936  $P < 0.05$ ) in all the three species were defined as the genes with universal pseudotime-  
937 dependent expression changes, or pseudotime-dependently expressed genes. To estimate  
938 the similarities of the expression trajectories among the three species for those genes,  
939 Pearson's correlation coefficient (PCC) was calculated for each gene between each pair of  
940 species, across its interpolated expression levels at 50 evenly distributed points along the  
941 aligned pseudotimes based on a natural spline regression model ( $df=6$ ). To determine the  
942 threshold of a conserved trajectory, we performed 100 pseudotime permutations of  
943 pseudocells in the three species. Pairwise PCCs between species were calculated for each  
944 of the pseudotime-dependently expressed genes based on the randomized pseudotimes.  
945 Minimal PCC of each gene based on each permutation was obtained, and the PCC  
946 threshold was determined as the average of the second highest minimal PCC among  
947 permutations across all genes of interest. Pseudotime-dependently expressed genes with  
948 PCC higher than the threshold between any species pairs were defined as genes with  
949 conserved expression pseudotemporal patterns in primates.

950

### 951 **Identification, clustering, and species specificity of differentially expressed genes** 952 **between humans and chimpanzees**

953 To compare transcriptome changes of the developmental trajectory from cortical neural  
954 progenitors to deeper layer neurons between human and chimpanzee, an F-test based  
955 comparison was applied to the expression profile along pseudotimes of the two species. In  
956 brief, for each gene, a natural spline linear regression model ( $df=6$ ) was constructed for  
957 human and chimpanzee pseudocells along the aligned pseudotime course, without  
958 discriminating human and chimpanzee samples, and used as the null model ( $m_0$ ). The  
959 alternative natural spline linear regression model was also constructed, with each species  
960 having its own slopes and intercept ( $m_1$ ). The residuals of the variation, which cannot be  
961 explained by each model, were compared by an F test. Non-ribosomal genes with BH-  
962 corrected  $P < 0.01$  were identified as differentially expressed genes (DE genes) between

963 human and chimpanzee along the developmental trajectory from cortical neural progenitors  
964 to deeper layer neurons (Supplementary Table 7).

965 To estimate the robustness of the identified differential expression (DE) to the  
966 number of used lines, as well as the pseudocell distribution along the pseudotime course,  
967 we used a series of replaceable pseudocell sampling procedure with constraints. In brief, in  
968 each round of replaceable pseudocell sampling, the candidate pseudocells to be selected  
969 are restricted to be those from a certain number of human cell lines. In addition, the  
970 subsampling in human pseudocells is performed to recapitulate the pseudocell distribution  
971 along the aligned pseudotime of chimpanzee pseudocells, i.e. each of the ten pseudotime  
972 bins contains the same number of human and chimpanzee pseudocells. This sampling  
973 procedure was performed 100 times for each possible number of human lines, ranging  
974 from one to seven. DE analysis, as described above, was applied to compare gene  
975 expressions of human pseudocells in each sampling with the chimpanzee pseudocells.  
976 Robust DE genes were determined as DE genes which can be detected in at least 80% of  
977 tests performed with replaceable pseudocell samplings with any number of used human  
978 cell lines.

979 A similar strategy was also used to estimate the false positive human-  
980 chimpanzee DE genes due to differences between cell lines. In each sampling, two lines  
981 were randomly selected as group one, and a certain number of lines, ranging from one to  
982 five, were selected from the remaining lines as group two. For each group, pseudocells  
983 were randomly sampled from the selected lines to recapitulate the pseudocell distribution  
984 along the aligned pseudotime of chimpanzee pseudocells. Such sampling was performed  
985 100 times for each possible number of lines used in group two. The transcriptome  
986 trajectory from cortical neural progenitors to deeper layer neurons in macaque organoids  
987 was used as the evolutionary outgroup to determine species specificity of the identified  
988 human-chimpanzee DE genes. First, the cumulative expression divergences of each gene  
989 between human and macaque ( $d_{HM}$ ), and between chimpanzee and macaque ( $d_{CM}$ ), were  
990 calculated. The cumulative expression divergence was calculated by summing up absolute  
991 values of average expression differences between species at the 50 pseudotime bins of  
992 equal sizes along the aligned pseudotimes. The human-chimpanzee DE of one gene is seen  
993 as human-specific if  $d_{HM} - d_{CM} > \max(d_{HM}, d_{CM})/2$ . Genes with chimpanzee-specific DE  
994 were identified in the same way. Genes with human-specific DE were then clustered based  
995 on their human-chimpanzee DE along pseudotimes. Average expression differences  
996 between human and chimpanzee at each of the 50 pseudotime bins along the pseudotimes  
997 was calculated for each gene with human-specific DE (denoted as  $d_t$  at pseudotime bin  $t$ ),  
998 and then normalized as  $\widehat{d}_t = d_t / (\max_t d_t - \min_t d_t)$ . Hierarchical clustering (Ward algorithm)  
999 was then used to cluster those genes into nine clusters, with distances between genes  
1000 calculated as the Euclidean distances between their normalized DE spectrums. Clusters  
1001 with fewer than five genes were discarded. We annotated genes with human-specific  
1002 expression patterns using the Homo sapiens Gene Ontology Annotation file (validation  
1003 date: 21/04/2017) provided by the Gene Ontology Consortium.

1004

### 1005 **Processing of the Fluidigm C1 based scRNA-seq data of cerebral organoids**

1006 In addition to the newly generated Fluidigm C1 (SmartSeq2)-based scRNA-seq data, we  
1007 further retrieved published sequencing data of 786 and 344 single cells from human and

1008 chimpanzee cerebral organoids<sup>17,19</sup>, in the format of FASTQ files from GEO accession  
1009 numbers GSE75140 and GSE86207 (CMK data set). All the reads were mapped to the  
1010 human-chimpanzee-macaque consensus genome using STAR (v2.6.1d) with ‘--quantMode’  
1011 parameter set to ‘*TranscriptomeSAM*’ and GENCODE v27 annotation provided. Gene  
1012 expression levels in each cell were quantified as TPM by RSEM (v1.3.1). Additionally, we  
1013 retrieved the recently published gene expression matrix representing 3211 cells from  
1014 human and chimpanzee cerebral organoids (excluding redundant cells from GSE75140 and  
1015 GSE86207) and 4854 cells from human and macaque fetal brains<sup>21</sup>.

1016 Based on the resulting gene expression profile, RSS to the fetal Brainspan data set  
1017 was calculated as described above for each cell, with 248 genes with significant differential  
1018 expression between cortical neurons measured by Smart-seq and Smart-seq2 excluded  
1019 from the references. Distances between organoid cells were calculated as the Pearson’s  
1020 coefficient distances between RSS of cells. Distances between cells from fetal brains were  
1021 calculated in the same way. The resulted distance matrices of all organoid cells and fetal  
1022 brain cells were used as the input to generate tSNE embeddings. kNN-network (k=50) was  
1023 generated for organoid cells and fetal brain cells separated based on the RSS-based  
1024 distances, and a Walktrap algorithm for network community identification was applied to  
1025 identify cell clusters, which were further annotated based on their marker genes. Based on  
1026 the cell type annotation, the diffusion map analysis, with the RSS profiles as input, was  
1027 applied to the dorsal forebrain NPCs and neurons in organoids and fetal brains,  
1028 respectively. The ranks of DC1 were used as the pseudotimes.

1029 To validate the human-chimpanzee differential expression identified in our droplet-  
1030 based scRNA-seq data using the C1-based cerebral organoid data, the organoid dorsal  
1031 telencephalon pseudotemporal trajectory was firstly split into ten intervals. In each  
1032 pseudotemporal interval, the human-chimpanzee DE was calculated as the log2-  
1033 transformed fold change (log2FC) between the average expression of human and  
1034 chimpanzee cells in the interval. Here, the CMK data set and other data sets which used a  
1035 distinct quantification method were processed separately. A similar strategy was also  
1036 applied to the aligned droplet-based human and chimpanzee pseudotemporal trajectories.  
1037 Generalized log2-transformed fold change (gLog2FC), defined as the average log2FC  
1038 across the pseudotemporal intervals, as well as the maximum log2FC across the intervals  
1039 (mLog2FC), was further calculated for each human-chimpanzee robust DE genes in  
1040 organoids. A DE gene is seen as being consistent in the two data sets if both gLog2FC and  
1041 mLog2FC of the C1-based and droplet-based human-chimpanzee comparisons are of the  
1042 same signs (refer as consistent DE genes). The pseudotemporal intervals with the  
1043 maximum fold change in the droplet-based and C1-based trajectories were also obtained  
1044 and compared for the consistent DE genes. This procedure was also applied to compare  
1045 human-macaque differential expression of the human-specific DE genes along the droplet-  
1046 based pseudotemporal trajectory and the C1-based fetal brain pseudotemporal trajectory.

1047

#### 1048 **Single-cell and bulk ATAC-seq data generation**

1049 Organoids of 2 to 4 months old were washed twice with PBS in a Tissue-Tek Cryomold  
1050 (Sakura), then embedded in 4% low-melting agarose (Sigma) and sliced into 150  $\mu$ m  
1051 sections using a vibrating microtome (Ci 7000 smz, Camden Instruments). Slices were  
1052 placed on microscope slides containing Differentiation medium with vitamin A (Diff +VA)  
1053 and inspected under a stereomicroscope to dissect cortical regions. Selected regions were



1054 washed twice in 500  $\mu$ L PBS and incubated at 37°C in 500  $\mu$ L Accutase (Sigma) plus 0.5  $\mu$ L  
1055 DNase I (New England Biolabs) for ~45 minutes. Trituration was performed for additional  
1056 mechanical dissociation. Cells were passed through a 30  $\mu$ m pre-separation filter (Miltenyi  
1057 Biotec), washed with Diff+VA medium, and spun down at 300 x g (Heraeus Megafuge 40R,  
1058 Thermo Scientific) for 5 minutes. The cell pellet was resuspended in 200  $\mu$ l of Diff+VA  
1059 medium. Cells were viewed under a microscope to ensure a single cell suspension was  
1060 obtained, and then counted using a Countess Automated Cell Counter (Invitrogen). Single  
1061 cell suspensions for the early stages of organoid differentiation (iPS cells to  
1062 neuroepithelium) were obtained as described above.

1063 From the cell suspension, 50,000 cells were used as input for bulk ATAC-seq as  
1064 described<sup>62</sup>. The remaining cells were diluted to a final concentration of 300 cells/ $\mu$ l and  
1065 used for microfluidics based single-cell ATAC-seq as described<sup>63</sup>. Briefly, cells were mixed  
1066 with Suspension Reagent (Fluidigm) at a 3:2 ratio and loaded onto a primed medium (10-17  
1067  $\mu$ m) integrated microfluidic circuit (Fluidigm) for capturing. Cell capture sites were examined  
1068 under a microscope and noted for containing 0, 1, or multiple cells. Lysis, transposition,  
1069 and amplification were performed on the Fluidigm C1 platform. DNA from each cell was  
1070 transferred to an individual well of a 96-well plate and barcoded with unique combinations  
1071 of 24 adapter-index i7 and 16 adapter-index i5 primers<sup>63</sup>. Quantification and library size  
1072 distribution was assessed on an Agilent 2100 Bioanalyzer using High Sensitivity DNA chips.  
1073 Excessive primer contamination was removed using SPRIselect (Beckman Coulter Life  
1074 Sciences) size selection. Up to 192 cells were pooled and sequenced in paired-end, dual-  
1075 index mode for 50+8+50+8 cycles on one lane of an Illumina HiSeq 2500. A summary of all  
1076 single-cell experiments can be found in Supplementary Table 1.

1077

### 1078 **Single-cell and bulk ATAC-seq data processing**

1079 Base calling was performed using Bustard (Illumina), adapter trimming with leeHom<sup>64</sup>, and  
1080 demultiplexing with deML<sup>65</sup>. Reads were aligned to hg19 for human, panTro4 for chimp,  
1081 and rheMac8 for macaque using bowtie2 with a maximum fragment length of 2000. PCR  
1082 duplicates were marked and removed using Picard tools  
1083 (<http://broadinstitute.github.io/picard>). Samtools<sup>66</sup> was used to retain properly paired reads  
1084 with mapping quality greater than 30, while reads mapping to the mitochondrial genome, Y  
1085 chromosome, and blacklisted genomic regions that show excessively high read mapping,  
1086 several of which correspond to nuclear mitochondrial DNA segments (identified in  
1087 Buenrostro et al.<sup>63</sup> and the ENCODE Project<sup>67</sup>) were removed. For scATAC-seq, single cell  
1088 BAM files were merged, excluding data from any capture site with 0 or more than 1 cell, to  
1089 create an aggregated BAM file. Peaks, which represent regions enriched in mapped pair-  
1090 end sequences, were called using MACS2<sup>68</sup> with options nomodel, nolambda, keep-dup all,  
1091 and call-summits. Peak summits were extended by  $\pm$ 250 bp. In the event of overlapping  
1092 peaks, the peak with the lowest p-value was kept. A single-cell ATAC-seq consensus peak  
1093 set was obtained by requiring a peak to be accessible in a minimum of 5% of cells. Data  
1094 visualization was carried out using the Integrative Genomics Viewer (IGV)<sup>69</sup>.

1095

### 1096 **Enrichment for validated human VISTA enhancers**

1097 We overlapped scATAC-seq peaks detected in human cerebral organoids with positive  
1098 human VISTA enhancers using bedtools *intersect*. For each tissue annotated in the VISTA  
1099 Enhancer Browser, we counted the number enhancers that did or did not overlap a peak.

1100 We compared these values to the number of all other tissue elements that did or did not  
1101 overlap a peak. Fisher's exact tests were performed to determine which tissues' enhancers  
1102 had a higher likelihood of being represented. The significance values were corrected for  
1103 multiple testing using the *qvalue* package in R.

1104

### 1105 **Cell state identification using single cell ATAC-seq on cerebral organoids and** 1106 **pseudotime estimation**

1107 The accessibility at each site in the consensus peak set for every single cell was used to  
1108 create a count matrix. Cells with fewer than 5000 reads and less than 5% of reads in peaks  
1109 were filtered out from further analyses. chromVAR<sup>40</sup> was used to scan the peaks for  
1110 transcription factor binding motif occurrences, using a curated collection of 1,765 human  
1111 motifs from the cisBP database, and to identify significantly variable motifs among cells. In  
1112 addition to TF binding motifs, peaks were scanned for 7-mers. Cell similarity was visualized  
1113 in a two-dimensional t-SNE plot using the bias-corrected deviations in accessibility for 7-  
1114 mers with a variability score greater than 1.5.

1115 Each cell's t-SNE coordinates and the consensus peaks were passed to Cicero<sup>70</sup>  
1116 and the densityPeak algorithm was used to identify two clusters of cells. Statistically  
1117 significant differences in TF motif accessibility between the two clusters was calculated  
1118 using chromVAR, and those motifs corresponding to marker TFs known to distinguish  
1119 neural progenitors and neurons was used to for cell state identification. Statistically  
1120 significant differences in accessibility of additional annotations between the two clusters  
1121 were used to support cell state identities. These annotations included differentially  
1122 accessible chromatin peaks identified as being enriched in developing mouse brain radial  
1123 glial cells or excitatory neurons<sup>71</sup>, as well as accessibility in peaks nearby genes showing  
1124 pseudotime-dependent expression in cortical neural progenitors or cortical neurons  
1125 identified as part of this study.

1126 We identified differentially accessible (DA) peaks between the two clusters using the  
1127 command differentialGeneTest in Cicero. A count matrix was generated with featureCounts  
1128<sup>72</sup> using the top 250 DA peaks in each cluster. This count matrix was used as input for a  
1129 diffusion map in order to obtain a pseudotemporal ordering of the cells<sup>73</sup>. Projecting  
1130 transcription factor binding motif deviation Z-scores on the cells revealed a gradient of  
1131 known neural progenitor to neuronal markers along the first diffusion map component and  
1132 we took a cell's rank along this component as its pseudotime value.

1133 DA peaks identified between the two clusters were used as input test regions for  
1134 GREAT (version 3.0.0)<sup>74</sup> with all accessible organoids peaks serving as background regions.  
1135 We used the default basal plus extension genomic association rule with its default values.  
1136 All gene ontology (GO) Biological Process terms and their associated hypergeometric p-  
1137 values were exported. For each term, we plotted the p-value obtained using cluster 1  
1138 (identified as NPCs) DA peaks and the p-value obtained using cluster 2 (identified as  
1139 neurons) DA peaks as input. Terms with a p-value < 0.05 were considered enriched.  
1140 Informative enriched terms were highlighted based on their significance value in one cell  
1141 state relative to the other, and for small differences between the cell states when  
1142 highlighting terms enriched in both.

1143

### 1144 **Single cell ATAC-seq pseudotime estimation for cells in early states of differentiation** 1145 **and cerebral organoids**

1146 Similar to the analysis of the cerebral organoids, we used chromVAR to calculate bias-  
1147 corrected deviations in accessibility for TF motifs and 7-mers for each cell. Here, we  
1148 included the scATAC-seq consensus peak sets called in the iPSC, embryoid body,  
1149 neuroectoderm, and neuroepithelial time points, in addition to the scATAC-seq consensus  
1150 peak set from the cerebral organoid time point. In the event of overlapping peaks, the peak  
1151 with strongest signal was retained. Cells with fewer than 5,000 reads and less than 5% of  
1152 reads in peaks (fraction of reads in peaks, FRiP) were removed from further analyses  
1153 (Supplementary Table 8). Cell similarity was visualized in a two dimensional t-SNE plot  
1154 using the bias-corrected deviations in accessibility for 7-mers.

1155 As the cerebral organoid cells' pseudotimes were previously resolved, we focused  
1156 on ordering the earlier stages. For this we used Cicero's differentialGeneTest to identify DA  
1157 peaks among the iPSC, embryoid body, neuroectoderm, and neuroepithelial time points. A  
1158 count matrix was generated using the top 250 DA peaks in each time point and used as  
1159 input for a diffusion map. Projecting TF motif deviation Z-scores of the cells revealed a  
1160 gradient of pluripotent to more differentiated marker TFs along the first three diffusion map  
1161 components. We fit a principle curve through the map, and used the pluripotent cells as a  
1162 starting point to guide the curve. The rank of a cell along this curve was used as its  
1163 pseudotime. We then added the cerebral organoid cells pseudotime ranks to the end of  
1164 this earlier stage resolved pseudotime. We used the pheatmap R package to visualize the  
1165 dynamics of significantly variable motifs across pseudotime.

1166

#### 1167 **Annotation of Accessible Chromatin Peaks**

1168 Peaks were linked to an expressed protein-coding gene using the nearest (maximum  
1169 distance 1 Mb) transcription start site of the canonical transcript as defined by GENCODE  
1170 (comprehensive gene annotation, release 19). Promoter regions were defined as 1000bp  
1171 upstream a TSS, and distal regions refer to non-promoter regions. Exon and intron  
1172 annotations were also obtained from GENCODE (comprehensive gene annotation, release  
1173 19). BEDtools<sup>75</sup> was used to annotate peaks for several evolutionary signatures, including:  
1174 human accelerated regions<sup>45-47</sup>; selective sweeps compared to great apes<sup>76</sup> and archaic  
1175 humans<sup>77</sup>; single nucleotide changes (SNC) in modern humans that happened since the  
1176 split with great apes and before or after the split with the ancestor of Neandertals and  
1177 Denisovans, first identified in Prüfer et al. 2014<sup>44</sup> and updated for this analysis using the  
1178 most current 1000 Genomes Phase 3 allele frequencies, with a global allele frequency  
1179  $\geq 99.5\%$  defined as fixed in all modern humans; small insertions and deletions (up to 5  
1180 nucleotides) fixed in modern humans that happened since the split with great apes and  
1181 before or after the split with the ancestor of Neandertals and Denisovans<sup>78</sup>, and, human  
1182 deletions that are highly conserved in mammals (hCONDELs, Supplementary Table 10)<sup>48</sup>.

1183

#### 1184 **Identification of genomic regions with differential accessibility between human and 1185 chimpanzee organoid neural progenitors and neurons**

1186 To compare the chromatin accessibility of NPCs and neurons in cerebral organoids  
1187 between human and chimpanzee and identify putative regulatory regions that may  
1188 contribute to transcriptome divergence between human and chimpanzee, we applied a  
1189 likelihood ratio test based on a generalized linear model with binomial error distribution to  
1190 each regulatory region identified in human and chimpanzee organoids. More specifically,  
1191 we identified open chromatin regions in human and chimpanzee organoids separately as

1192 described above. To compare an equal number of human and chimpanzee regions, we  
1193 took the top 77,611 peaks (corresponding to the number of human consensus peaks) in  
1194 each species and performed reciprocal liftOver, requiring a 50% minimum ratio of based  
1195 that must remap, in order to identify their orthologous counterparts in the other species.  
1196 Peaks that successfully lifted over (>99%) were merged using bedtools and re-named (i.e.  
1197 mergePeak#). Count matrices were generated at these merged peaks in the species own  
1198 genome, and the matrices were then joined on the common peak name. Considering the  
1199 higher read coverage in human cells, we subsampled reads in human cells to equalize the  
1200 medians of total number of reads mapped to the regions of interest in human and  
1201 chimpanzee. This procedure was applied separately to NPCs and neurons. The resulting  
1202 count matrices were binarized. We then fitted a generalized linear model for each region  
1203 across all human and chimpanzee cells, with the accessibility as the response variable and  
1204 species as the independent variable. Another model with the species variable replaced by a  
1205 scaling coefficient was also fitted as the null model. The scaling coefficient is fixed to one  
1206 for human cells and  $p_c/p_h$  for chimpanzee cells, where  $p_c$  and  $p_h$  are the average  
1207 accessibility across all regions and all cells in chimpanzee and human, respectively. We  
1208 compared the two models and got the p-values by using the likelihood ratio test. Regions  
1209 with BH-corrected  $P < 0.01$  were defined as differentially accessible (DA) regions  
1210 (Supplementary Table 9). This procedure was applied to NPCs and neurons separately to  
1211 obtain DA regions in the two cell states.

1212

### 1213 **Functional and evolutionary characterization of genomic regions with differential** 1214 **accessibility**

1215 We performed permutations to determine if differentially accessible (DA) peaks were  
1216 significantly more likely to overlap a given annotation compared to non-differentially  
1217 accessible (non-DA) peaks. In more detail, we first resized all peaks to an equal length of  
1218 500bp and calculated the average accessibility of human and chimp cells in the resized DA  
1219 and non-DA peaks. Peaks were then placed into average accessibility bins of 5% intervals.  
1220 Given the number of DA peaks in each accessibility bin, the same number of non-DA peaks  
1221 was chosen at random from the corresponding accessibility bin. The random set of non-DA  
1222 peaks was then overlapped with the given annotation using bedtools *intersect*. The random  
1223 sampling of non-DA peaks and annotation overlap was repeated 2000 times. For each  
1224 annotation, we counted the number of times a non-DA peak permutation resulted in a  
1225 higher overlap than what was observed for DA peaks. This number was divided by the  
1226 number of permutations to determine significance ( $p < 0.05$ ).

1227 We used fixed SNCs, organoid-specific peaks, and linked differentially expressed  
1228 (DE) genes as annotations. When overlapping peaks with fixed SNCs, we restricted the  
1229 analysis to include only regions that passed a stringent genome alignability filter  
1230 ("`map35_100%`")<sup>44</sup>, in which SNCs could be called. Organoid-specific peaks were defined  
1231 as peaks detected in 2-month and 4-month old cerebral organoid stages, but not detected  
1232 in earlier stages of differentiation (pluripotency to neuroepithelial stages). Cell state-specific  
1233 peaks were those identified as differentially accessible between NPCs and neurons in  
1234 either human or chimp.

1235 To study putative effects of fixed SNCs on transcription factor binding in the  
1236 accessible genomic regions, we used funseq2<sup>79</sup> to scan and statistically evaluate all  
1237 possible transcription factor binding motifs created by fixed SNCs in DA peaks. To



1238 generate a list of TF motifs lost on the human lineage, we used the human allele as the  
1239 reference allele and the ancestral allele<sup>44</sup> as the alternative allele. To generate a list of TF  
1240 motifs gained on the human lineage, we flipped the state of the reference and alternative  
1241 allele. This allowed us to directly compare the sequence scores of TF motifs gained or lost  
1242 in humans. We subtracted the sequence score with the alternative allele from the sequence  
1243 score with reference allele and performed min-max normalization. Human TF motif gains  
1244 were plotted as positive values, while human TF motif losses were plotted as negative  
1245 values. The genomic location of SNCs predicted to alter TF motif binding are provided in  
1246 Supplementary Table 10. The alteration rate for TF motifs gained in humans was calculated  
1247 by dividing the number of gains in DA peaks by the number of occurrences of that motif  
1248 when scanning all organoid accessible peaks using chromVAR and the human genome  
1249 sequence. The alteration rate for TF motifs lost in humans was calculated by dividing the  
1250 number of losses in DA peaks by the number of occurrences of that motif when scanning  
1251 all organoid accessible peaks using chromVAR and the chimpanzee genome sequence.  
1252 The alteration rates of human TF gains and losses were also calculated per TF family, using  
1253 TF motif family assignments obtained from<sup>80</sup>.

1254 We used the macaque cerebral organoid scATAC-seq data to determine species  
1255 specificity of the peaks identified as differentially accessible between human and  
1256 chimpanzee (Supplementary Table 9). In brief, we counted read coverage of each  
1257 accessible region we compared between human and chimp which can lift over to the  
1258 macaque genome in each macaque cell. Regions failed during liftover were seen as  
1259 inaccessible in all macaque cells. A random sampling of reads in human and chimpanzee  
1260 cells was applied to equalize median read coverage in the three species. This procedure  
1261 was applied 100 times and to the two cell states separately. Accessible probability was  
1262 then calculated for the two cell states in the three species. In human and chimpanzee,  
1263 averages across the 100 read-subsampling-based estimation were used. The difference of  
1264 accessible probability between human and macaque (H-M), and that between chimpanzee  
1265 and macaque (C-M), was then calculated for each human-chimpanzee DA peak in each cell  
1266 state. The identified DA was considered as human-specific if its H-M difference is at least  
1267 four times larger than the C-M difference, while its H-M difference is no less than 2%.  
1268 Similar criteria was also applied to define chimp-specific DA.

1269 To investigate potential biological processes that may be influenced by DA peaks,  
1270 we used human-chimp DA peaks for each cell state (NPC or neuron) as input test regions  
1271 for GREAT (version 3.0.0)<sup>74</sup> with all accessible organoids peaks serving as background  
1272 regions. This analysis was then carried out the same way as explained above.

1273

### 1274 **Single-nucleus and bulk RNA-Seq data generation**

1275 Cubes were dissected from prefrontal cortex from human, chimpanzee, bonobo and  
1276 macaque on dry ice aiming for cubes with few curvature to obtain reproducible slicing  
1277 results. Briefly, the thickness of grey matter at all facets of the cube was measured to obtain  
1278 a mean gray matter thickness. The mean thickness was divided by 10 to obtain the  
1279 thickness for each of the segments, whereby each of the segments consisted of several  
1280 slices at 50 um thickness. Sectioning was performed in a cryostat (Microm, Thermo Fisher),  
1281 with slices being alternately immersed in Trizol (Invitrogen) for bulk RNA isolation or  
1282 transferred to a dry tube (low binding) for single nucleus isolation on dry ice. Segments 11



1283 and 12 were collected as well but were considered being derived from white matter of the  
1284 cortex. Samples were then stored at -80°C until further use.

1285 For nuclei isolation from frozen tissue, all following steps were performed on ice with  
1286 precooled buffers and centrifugation steps were performed at 4°C. Briefly, tissue was spun  
1287 down, thawed on ice and 1 ml PBSE (PBS (Gibco), 2 mM EDTA (Life Technologies)) was  
1288 added to the tissue. The tissue slices were incubated at 4°C on a shaker at 1500 rpm for a  
1289 total of 45-60 min with trituration steps in between using 1000p and 200p to homogenize  
1290 the tissue. Generally, segments 1-10 were used for single-nucleus experiments. Two  
1291 segments were pooled to obtain sufficient material for single nucleus isolation, resulting in 5  
1292 segments per individual. To reduce batch effects and increase the number of nuclei per  
1293 experiment, material from three different individuals (originating from human, chimp/bonobo  
1294 and macaque respectively) was pooled for each segment. After homogenization, solutions  
1295 were combined in a 5 ml tube and spun down at 900xg for 5 min. The pellet was  
1296 resuspended in 1.5 ml PBSE + 1% NP-40 (BioVision), triturated 20 times using 1000p and  
1297 incubated for 7 min incubation on ice. Samples were then spun down at 900xg for 5 min and  
1298 resuspend in 1.5 ml PBSE + 1% BSA (Serva) two times. Samples were then spun down  
1299 again at 900xg for 5 min and resuspended in PBS + 1% BSA. Before sorting, samples were  
1300 filtered through a 30 um cell filter (Miltenyi Biotec) and stained using DAPI (1:1000, BD  
1301 Pharmingen). Nuclei were sorted in yield sort mode (BD FACS AriaIII and BD FACS Fusion)  
1302 based on a defined nuclei population by excluding debris using FSC and SSC and by  
1303 sorting DAPI positive events. Nuclei were sorted in bulk into 96 well plates and spun down 5  
1304 min at 600xg to enrich for nuclei in the pellet.

1305 For each of the pooled samples, 2 lanes on a 10X Chromium microfluidic chip were  
1306 loaded if feasible, aiming for the maximum possible number of nuclei to be targeted  
1307 obtained from the sorting. Single-nucleus experiments were performed using the 10X  
1308 Genomics Single Cell 3' kit v2 to encapsulate nuclei along with barcode tagged beads,  
1309 generate and amplify cDNA and to generate sequencing libraries. Each pooled library was  
1310 barcoded using i7 barcodes provided by 10X Genomics. cDNA and sequencing library  
1311 quality and quantity were determined using Agilent's High Sensitivity DNA Assay. Libraries  
1312 were pooled and sequenced in 150bp paired-end mode on Illumina's NovaSeq platform as  
1313 provided in Supplementary table 1.

1314 RNA isolation for bulk-RNA Seq was performed using the Direct-zol 96 RNA kit  
1315 (Zymo Research) and was quantified using Agilent's Bioanalyzer RNA 6000 Nano and Pico  
1316 kit. Libraries were prepared using the NEBNext Ultra Low RNA Library Prep Kit (New  
1317 England Biolabs). Library quantification was performed using Agilent's Bioanalyzer DNA  
1318 1000 chip kit. All bulk RNA Seq libraries were pooled at equal ratios and sequenced on one  
1319 lane of an Illumina NovaSeq platform in 150 bp paired-end mode.

1320

### 1321 **Processing of single-nucleus and bulk RNA-seq data from human, chimpanzee and** 1322 **macaque adult brains**

1323 Single-nucleus libraries were demultiplexed based on their i7 index sequences using 10x  
1324 Cell Ranger (v2.1). Mapping to the human-chimp-macaque consensus genome and  
1325 generation of count matrices was then performed using the same Cell Ranger, with the  
1326 GENCODE v27 human annotation provided. Nuclei were assigned to species based on  
1327 species specific sites using a two-step approach by separating all great ape from macaque  
1328 nuclei first and subsequently assigning nuclei to either human or chimp/bonobo. Nuclei  
1329 with a support of less than 80% for either of the groups were removed from further

1330 analysis. Moreover, nuclei with less than 200 and more than 6,000 genes detected, so as  
1331 those with more than 5% detected transcripts being transcribed from mitochondria, were  
1332 removed from further analyses.

1333 The full single-nucleus RNA-seq data set including all species was further analyzed  
1334 using Seurat (v3) (Supplementary Table 12). Single-nucleus expression values were  
1335 normalized and highly variable genes were identified using a variance stabilizing function to  
1336 detect the top 2000 variable genes (Supplementary Table 11). Data were then integrated by  
1337 finding corresponding anchors between the species using 30 dimensions. Scaling and  
1338 principal component analysis were performed using the integrated data. The top 20  
1339 principal components were used to identify neighbors of cells and clusters and to visualize  
1340 the clustering using tSNE embedding. Cluster identities were assigned using unbiased  
1341 identification using cluster markers by running Seurat's FindAllMarkers function (Wilcoxon  
1342 test, min.pct = 0.25, min logFC = 0.25) using non-integrated expression values, known  
1343 marker genes reported elsewhere (Lake et al., PMID: 27339989, 29227469) and by cell type  
1344 prediction using Seurat's TransferData function to anchor to the published Drop-seq based  
1345 human adult frontal cortex snRNA-seq data (Lake et al. Nature Biotech, PMID: 29227469).  
1346 Two potential doublet clusters (c11, c19) were excluded from further analysis. For analysis  
1347 of the major cell classes (excitatory neurons, inhibitory neurons, astrocytes,  
1348 oligodendrocytes, oligodendrocyte precursor cells, microglia, endothelial cells) subtype  
1349 clusters were combined and cell type markers recalculated using Seurat's FindAllMarkers  
1350 function (Wilcoxon test, min.pct = 0.25, min logFC = 0.25) using non-integrated expression  
1351 values (Supplementary Table 13).

1352 Since nuclei of the three species have significantly different transcriptome coverage,  
1353 pseudo-nuclei were constructed for more robust transcriptome measurement, as well as  
1354 for more fair and efficient comparison, using a similar procedure as described above to  
1355 generate pseudocells, under the constraint of merging only nuclei from the same segment  
1356 of the same sample and grouped in the same cell cluster. The probabilities of nuclei  
1357 selected as pseudo-nuclei seed were 1/13 for human, 1/8 for chimpanzee and 1/10 for  
1358 macaque.

1359 Reads of the bulk RNA-seq samples were mapped to the human-chimpanzee-  
1360 macaque consensus genome using STAR (v2.6.1d). The Python utility hiseq-count was  
1361 used to count the numbers of uniquely mapped reads of genes annotated in GENCODE  
1362 v27 human annotations. DESeq2 was used for normalization and retrieving FPKM as the  
1363 expression level measurement.

1364 To determine the laminar origin of each segment, genes with segment-dependent  
1365 expression were firstly screened for each cortical cube. In brief, an ANCOVA analysis was  
1366 applied to compare two models: the natural spline (df = 6) linear model with log10-  
1367 transformed FPKM as the response and the segment order as the variable; the null model  
1368 of expression values without any linear relationship with segments. For each of the resulted  
1369 gene, its enriched segments in the cube were identified, as the segments with the gene's  
1370 expression at least one standard deviation higher than the mean across segments. Genes  
1371 with enriched expression at each segment were then overlapped with the layer markers  
1372 identified in <sup>9</sup>. Segments with enriched genes significantly overlapping with markers of only  
1373 one layer were seen as pure-layer original, others were seen as mixture of multiple layers.  
1374 For each mixture segment, a quadratic-programming-based transcriptome deconvolution <sup>81</sup>  
1375 was applied to determine the relative contribution of the enriched layers. A layer index was

1376 then obtained for each segment, as the average layers weighted by contributed proportion  
1377 of the enriched layers.

1378

### 1379 **Estimation of cell type distribution across cortical layers and gene expression** 1380 **patterns in neurons across cortical layers**

1381 To estimate the cell type composition of each layer, nuclei from each sample were  
1382 randomly assign to one layer, based on the layer mixture proportions estimated above. The  
1383 proportion of each of the six major cell classes: excitatory neurons, inhibitory neurons,  
1384 astrocytes, oligodendrocytes, oligodendrocyte precursor cells (OPCs), microglia and  
1385 endothelial cells, was then calculated for nuclei assigned to each layer in human. This  
1386 procedure was repeated 100 times, with the resulted average as the final estimation. The  
1387 laminar distribution of each cell cluster was also estimated based on the described  
1388 procedure. In addition, a subsampling procedure with replaceable manner of the same  
1389 number of nuclei ( $n = 200$ ) from each layer was further applied to each of the 100 nuclei  
1390 layer random assignment to control differences on the detected nuclei number of each  
1391 layer. To get more precise estimation of layer origins on the nuclei level for excitatory and  
1392 inhibitory neurons, both of which show a distinct layer distribution pattern across different  
1393 subtypes, we trained an elastic net linear regression model ( $\alpha = 0.5$ ) on excitatory and  
1394 inhibitory neurons separately, with the sample layer indices as the training response and  
1395 expression levels of the highly variable genes as the variables. To enhance model  
1396 robustness, pseudo-nuclei from all the three species together were used for model  
1397 trainings. The trained models were then applied to the excitatory and inhibitory pseudo-  
1398 nuclei again. The predicted layer indices were used as the estimated relative laminar  
1399 location of the pseudo-nuclei. The projection of the predicted layer indices to layers were  
1400 done by averaging expression patterns of markers of different layers<sup>9</sup>.

1401

### 1402 **Differential expression analysis between human and chimpanzee cell types in adult** 1403 **brains and determination of their species-specificity**

1404 Due to the sparse nature of the snRNA-seq data and the unequal coverage of nuclei from  
1405 different species, commonly used statistical test for differential expression analysis (e.g.  
1406 Wilcoxon's rank sum test) failed to provide reliable estimation of DE, even with the state-of-  
1407 art VST normalization methods<sup>82</sup>. As detection rates of genes are correlated with their  
1408 expression levels<sup>82</sup>, we therefore compared gene expression levels of the same cell type in  
1409 human and chimpanzee by comparing their detection rates, using a GLM-ANCOVA  
1410 analysis similar to the one described above to identify genomic regions with differential  
1411 accessibility. In brief, the pseudo-nuclei expression matrix was binarized. A binomial GLM  
1412 model was trained for each gene, with its detection as the response variable and species of  
1413 pseudo-nuclei as the independent variable. This model was compared to the null model  
1414 with the species variable replaced by a scaling coefficient. The scaling coefficient is fixed to  
1415 one for human pseudo-nuclei and  $p_c/p_h$  for chimpanzee pseudo-nuclei, where  $p_c$  and  $p_h$  are  
1416 the average detected gene numbers across pseudo-nuclei involved in the test in  
1417 chimpanzee and human, respectively.

1418 While the described DE test was applied to four cell classes with sufficient numbers  
1419 of pseudo-nuclei: excitatory neurons, inhibitory neurons, astrocytes and oligodendrocytes,  
1420 the heterogeneity within the two neuron types, as well as their uneven distributions in  
1421 human and chimpanzee, needed to be considered. A subsampling procedure with

1422 replaceable manner was therefore applied. In every subsampling, an equal number of  
1423 pseudo-nuclei ( $n = 200$ ) from each species were sampled, with pseudonuclei in clusters  
1424 annotated as the cell class of interest sharing equal probability being selected. The  
1425 described DE test was then applied to the sampled nuclei of this cell class. This  
1426 subsampling procedure was repeated for 100 times, and DE genes of each cell class were  
1427 defined as genes with significant DE (BH-corrected  $P < 0.005$ ) in at least 80 times of the  
1428 subsampling. Additional filtering was then applied, requiring the same direction of human-  
1429 chimpanzee difference on detection rates and VST-normalized expression values.

1430 Macaque pseudo-nuclei were then introduced to investigate species specificity of  
1431 the identified DE. Similar procedure sampling the same number of pseudo-nuclei from  
1432 clusters annotated to be the same cell class was repeated 100 times to the macaque  
1433 pseudo-nuclei. For each sampling, average VST-normalized expression values were  
1434 calculated for each cell class in human, chimpanzee and macaque, with which differences  
1435 between human and macaque ( $d_{HM}$ ), as well as between chimpanzee and macaque ( $d_{CM}$ ),  
1436 were calculated. The identified human-chimpanzee DE was defined as human-specific if  
1437  $|d_{HM}| > 4 * |d_{HC}|$ . Genes with chimpanzee-specific DE were identified in the same way  
1438 (Supplementary Table 14).





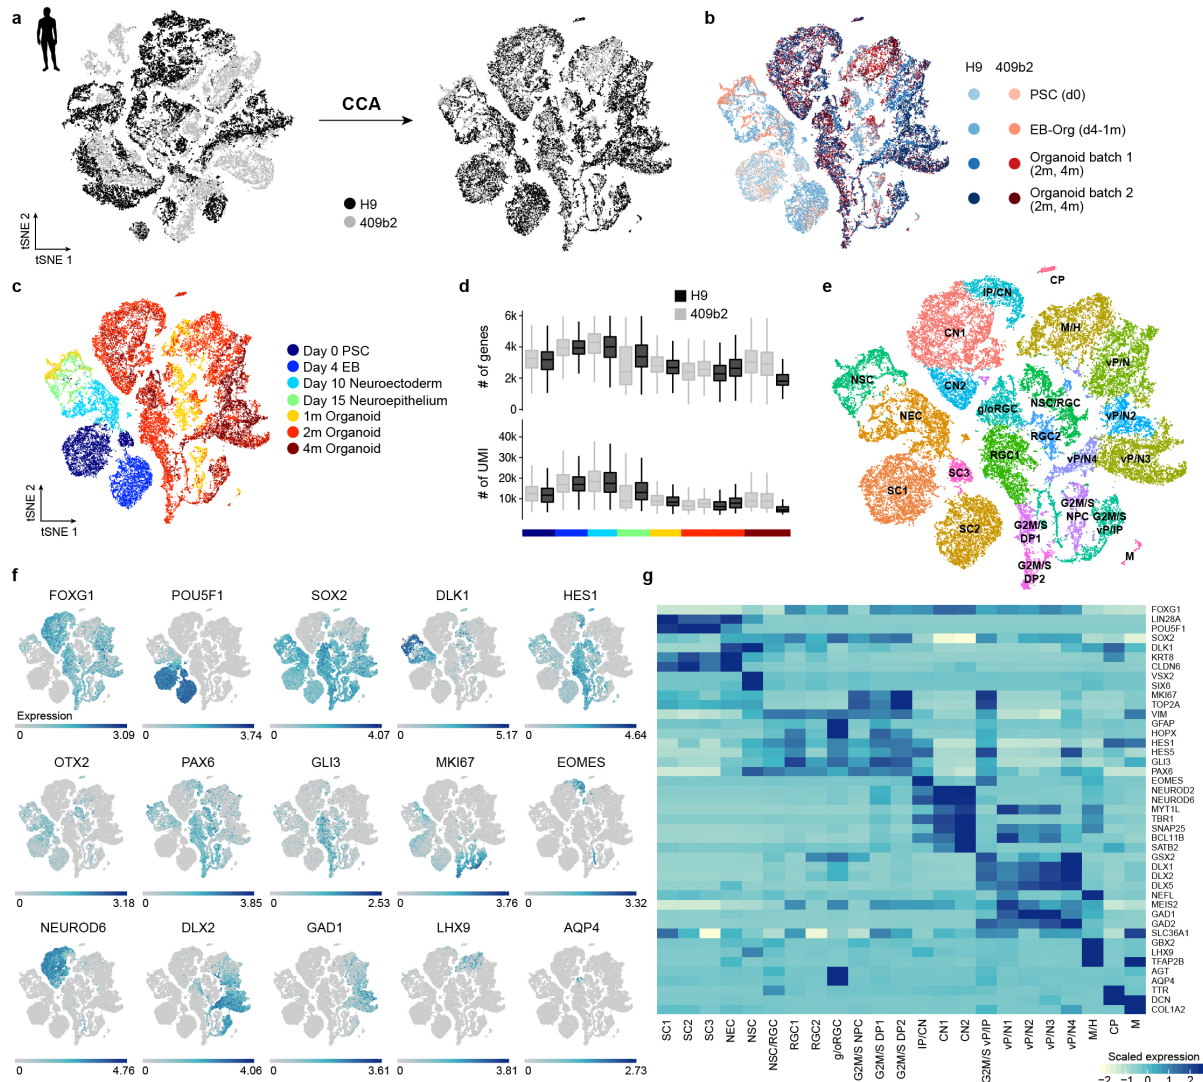

1451

1452

**Extended Data Figure 2: Heterogeneity analysis during human cerebral organoid**

1453

**development from pluripotency.**

1454

(a) Cells from different human cell lines were integrated

1455

using canonical correlation analysis and visualized using t-stochastic neighbor embedding

1456

(tSNE). (b) tSNE color coded based on cell line and batch. (c) tSNE colored based on time

1457

point. Heterogeneity analysis was performed on combined cells from day 0 of

1458

differentiation to 4 month old organoids for iPSC and ESC-derived cells. (d) Distribution of

1459

number of genes and UMIs for different time points and cell lines. (e) Clustering was

1460

performed using the top 20 principal components as input for tSNE and cluster names

1461

were assigned based on expression of cluster marker genes and known marker genes. SC

1462

– stem cells, NEC – neuroectoderm-like cells, NSC – neural stem cells, (g/o)RGC –

1463

(gliogenic/outer) radial glia cells, G2M/S NPC – neural progenitor cells in G2M/S phase,

1464

G2M/S DP – dorsal progenitor cells in G2M/S phase, IP – intermediate progenitor, CN –

1465

cortical neurons, G2M/S vP – ventral progenitors in G2M/S phase, M/H –

1466

midbrain/hindbrain, CP – choroid plexus, M – mesenchymal-like cells. (f) tSNE plot colored

1467

with respect to expression of selected marker genes based on non-integrated expression

1468

values. (g) Heatmap showing averaged cluster expression for representative marker genes

1469

for clusters ordered according to their differentiation time from early to later stages and

regional identity from dorsal to ventral forebrain and non-forebrain cells.

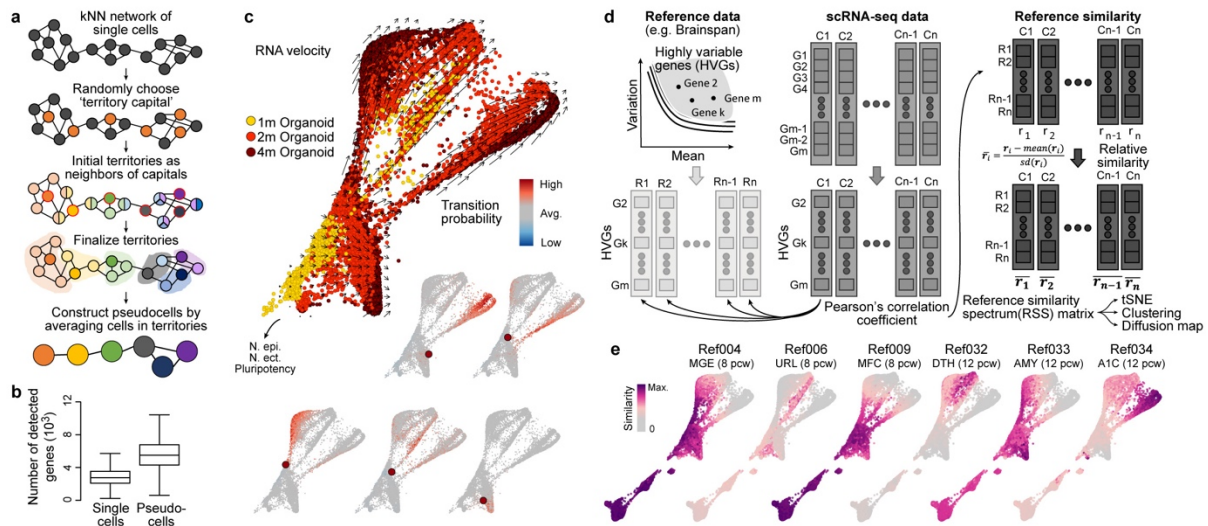

1470

1471

**Extended Data Figure 3: Pseudocell construction, monitoring differentiation using RNA velocity, and reference similarity spectrum calculation.**

1472

(a) Pseudocells are constructed based on kNN networks of single cells. Random cells in the network are selected as seeds or 'territory capitals', with their neighbors as initial members belonging to the territories; cells assigned to multiple territories are randomly assigned to one to finalize pseudocell territories, with the transcriptome of each pseudocell calculated as the average transcriptome of cells in its territory. (b) Boxplots (box, interquartile range (IQR); whisker, 1.5\*IQR) showing the number of detected genes significantly increased in the constructed pseudocells compared to single cells. (c) RNA velocity analysis applied to the constructed pseudocells suggests the neurogenesis trajectories of the three different neuronal branches of cortical neurons, ventral forebrain neurons and non-forebrain neurons. Velocity transition probabilities are shown for five example neural progenitor pseudocells (red). (d) Reference Similarity Spectrum (RSS) is calculated for each cell or pseudocell against RNA-seq data of 237 fetal macrodissected human brain samples in Allen Brain Atlas (Brainspan). Pearson correlation coefficients are calculated across 2,256 highly variable genes of the Brainspan data set. Correlations of one cell to different reference samples are normalized by z-transformation, which represents its normalized similarity to reference samples. The normalized correlation to each reference sample across cells represent similarity patterns of a cell to each reference sample, while the resulting normalized RSS of each cell is seen as its dimension-reduced representation. (e) SPRING plot with pseudocells colored by normalized similarities to six Brainspan reference samples.

1493

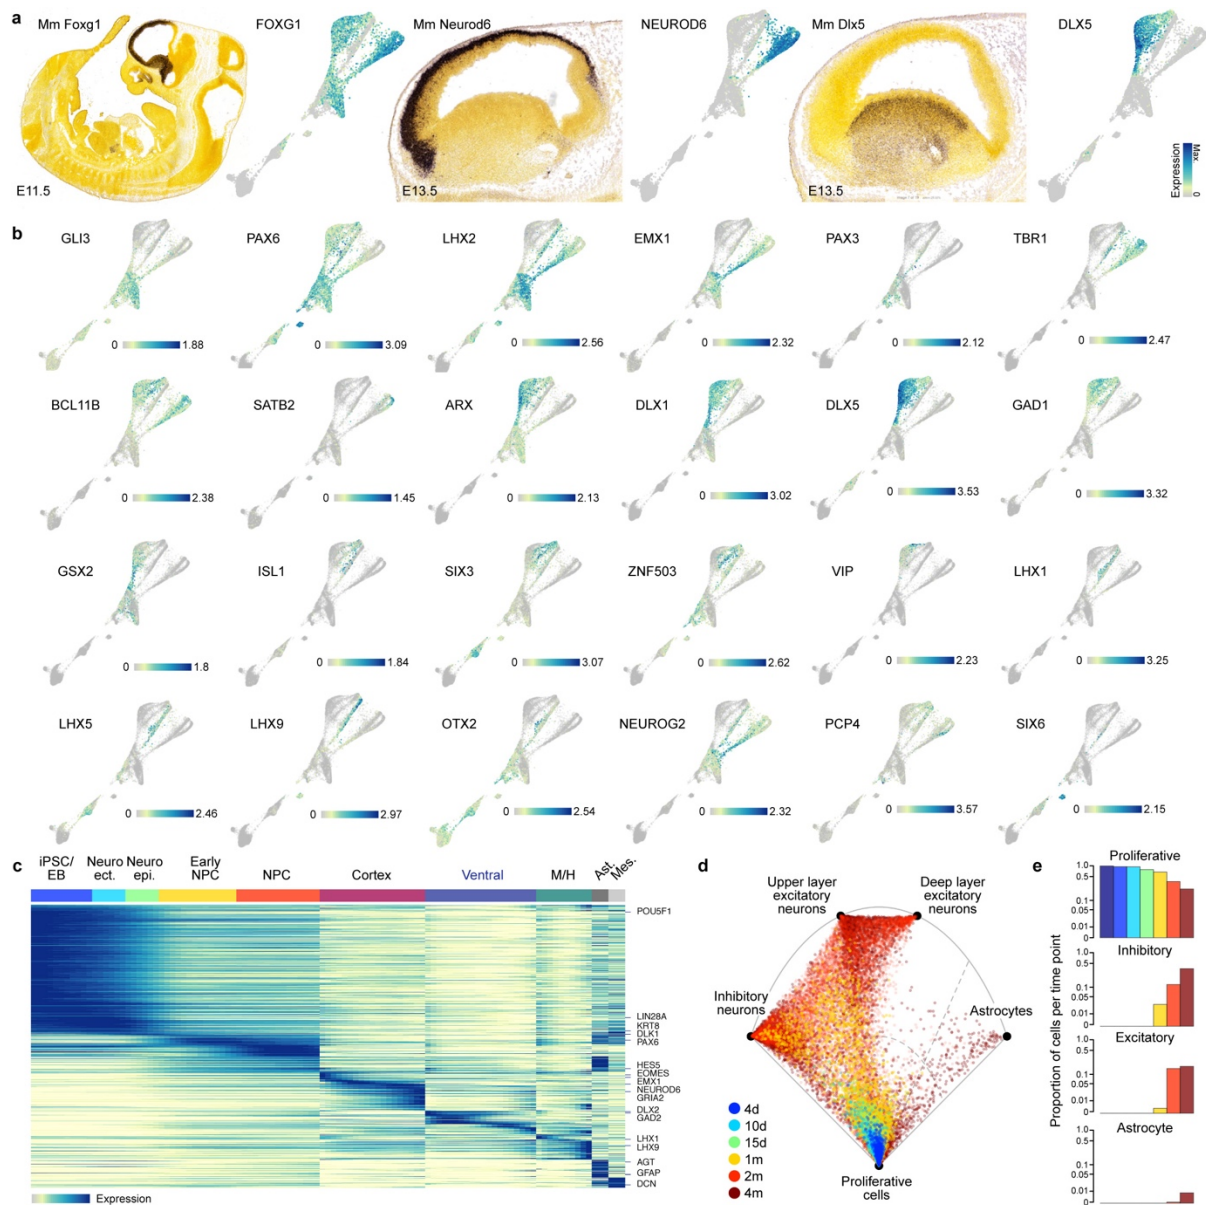

1494

1495

1496 **Extended Data Figure 4: Marker gene expression during the human organoid time course.**

1497 **(a)** In situ hybridization images from the Allen Developing Mouse Brain Atlas  
 1498 showing expression of Foxg1, Neurod6, and Dlx5 in the mouse developing forebrain and  
 1499 human whole-trajectory SPRING plots colored by the corresponding genes. **(b)** Whole-  
 1500 trajectory SPRING plot colored by marker gene expression. **(c)** Pseudotemporal expression  
 1501 of example genes with pseudotemporal expression changes in the whole human cerebral  
 1502 organoid developmental trajectory. **(d)** Umbrella plot showing the similarity of each  
 1503 organoid cell to a cell “prototype” generated from a reference scRNA-seq cell atlas of the  
 1504 human fetal cortex<sup>27</sup>. **(e)** Plots show the proportion of organoid cells per time point that  
 1505 match a reference prototype.

1506

1507

1508

1509



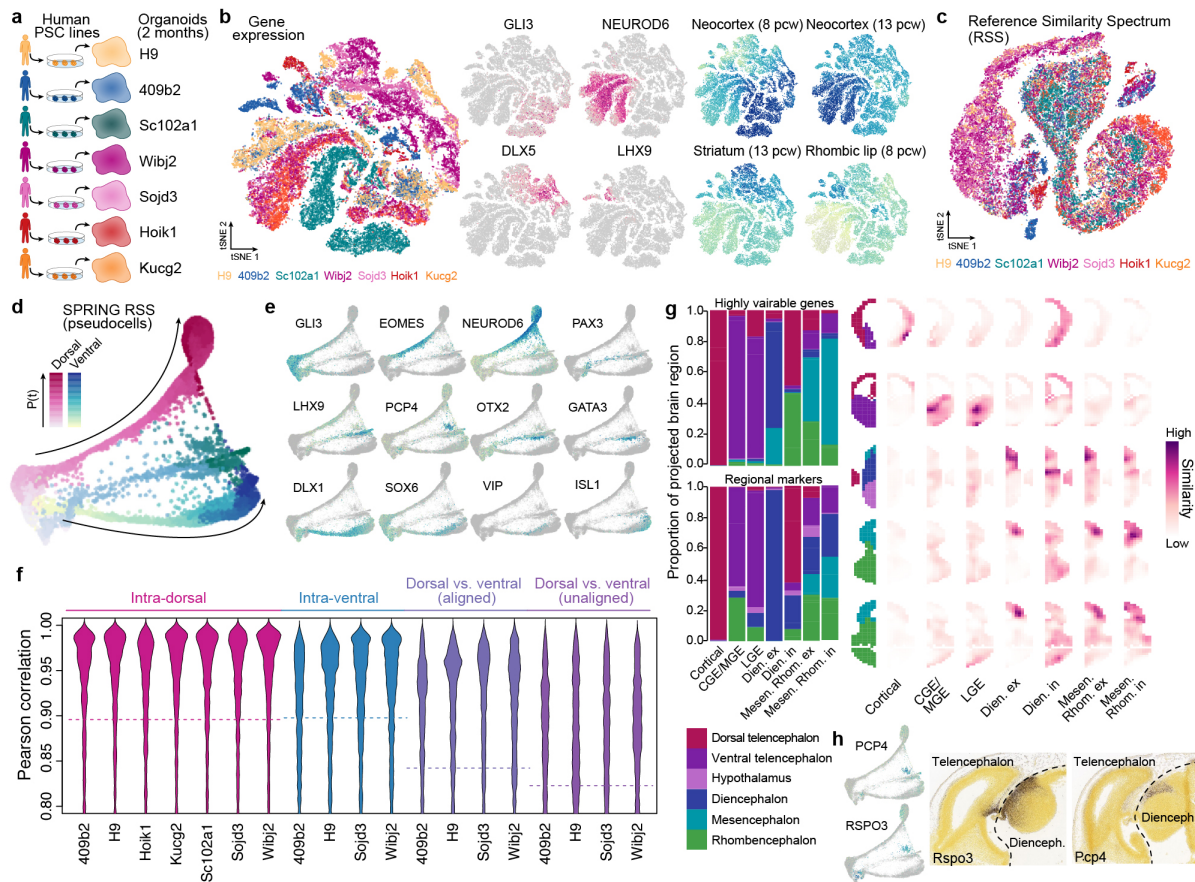

1510

1511

**Extended Data Figure 5: Analysis of human cerebral organoid single-cell transcriptomes from 7 individuals.**

1512

1513

1514

1515

1516

1517

1518

1519

1520

1521

1522

1523

1524

1525

1526

1527

1528

1529

1530

1531

1532

1533

(a) scRNA-seq was performed on 2-month old cerebral organoids from human ESC and six iPSC lines. (b) All data were combined and cell heterogeneity was assessed using t-distributed stochastic neighbor embedding (tSNE) with the top-20 principal components (PCs) as the input. Cells are also colored by marker gene expression and RSS. (c) tSNE plot with RSS against Brainspan fetal reference data as the input (RSS-tSNE), colored by cell lines. Cells from different lines are well integrated. (d) SPRING plot of 2-month old human organoid pseudocells, colored by neuronal trajectory branches and pseudotimes. (e) SPRING plot of 2-month old human organoid cells, colored by marker gene expression. (f) Correlations of expression trajectories of genes with pseudotime-dependent expression patterns between cortical cells from each line to the others (pink), ventral cells from each line to others (blue), and cortical and ventral cells from the same lines after or before aligning the cortical and ventral pseudotimes (purple). (g) Spatial location inference of neuron subtypes in human cerebral organoids. (Left) Barplots show proportion of cells of each cell type which show highest gene expression pattern similarity to the average expression patterns in different structures, based on the processed in situ hybridization image data (E13.5) provided in Developing Mouse Brain database of Allen Brain Atlas. Expression similarity was calculated based on highly variable genes of the scRNA-seq data (top), or regional markers defined with the ISH data (bottom left). (Right) Correlation patterns of average regional marker gene expression of each neuron subtype to voxels in five example sections (E13.5), as well as the structural annotation of the sections. (h) Expression of two marker genes of Diencephalon inhibitory neurons (PCP4, Rspo3) in the

1534 SPRING embeddings, and their spatial expression patterns in E13.5 mouse brain (data  
1535 from Allen Brain Atlas).  
1536



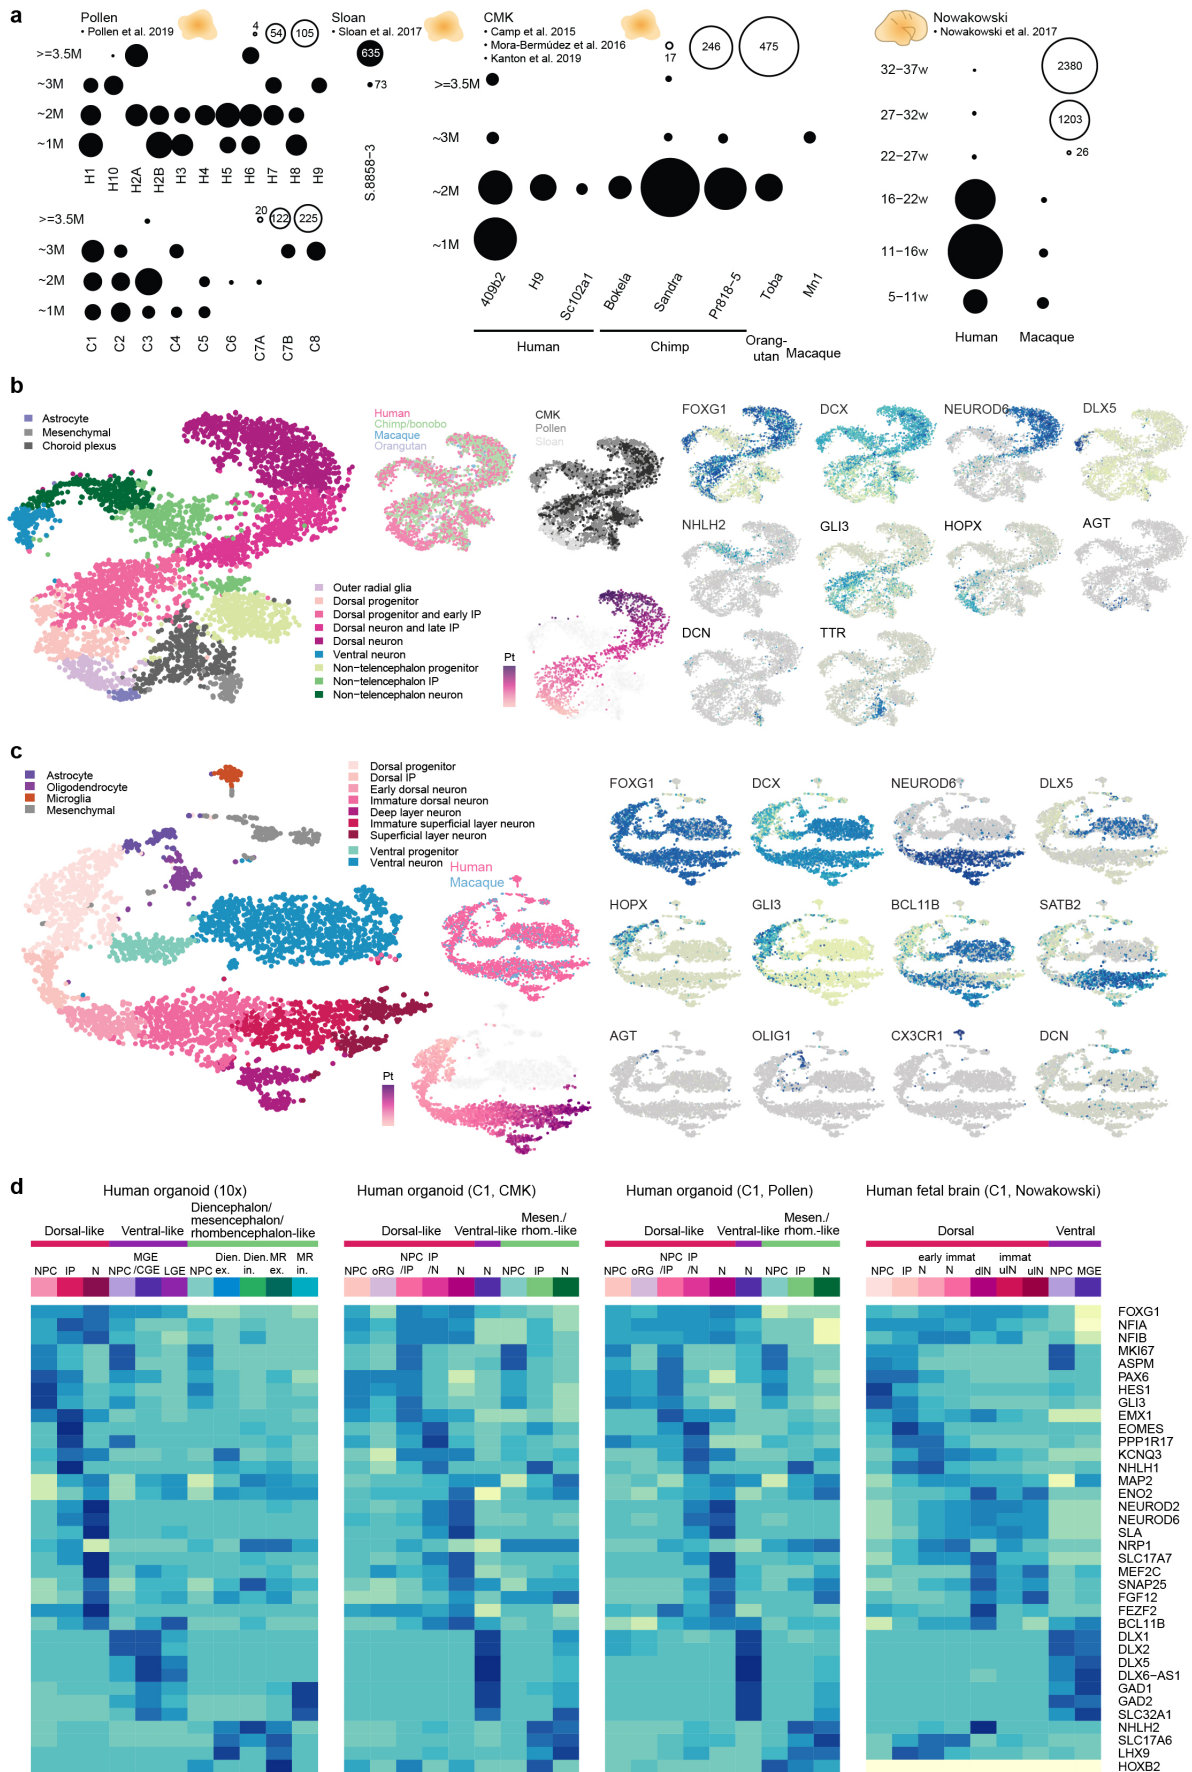

1538 **Extended Data Figure 6: Supplementary analysis on cell type heterogeneity of**  
1539 **cerebral organoids and fetal cortical tissues based on scRNA-seq data from Fluidigm**  
1540 **C1.**

1541 (a) Overview of the Fluidigm C1 scRNA-seq data. Each dot represents a cerebral organoid  
1542 or fetal brain sample from one cell line or species at a certain age, with its size showing the  
1543 number of cells measured. The left panel shows organoid sample information as published  
1544 in Pollen et al. 2019 (excluding redundant cells from Camp et al. 2015 and Mora-Bermudez  
1545 et al. 2016), including the data initially published in Sloan et al. 2017. The middle panel  
1546 shows organoid sample information generated in Camp et al. 2015, Mora-Bermudez et al.  
1547 2016, and in this manuscript. The right panel shows fetal prefrontal cortex sample  
1548 information reported in Nowakowski et al. 2017. (b) All cerebral organoid data were  
1549 combined and cell heterogeneity was assessed using t-distributed stochastic neighbor  
1550 embedding (tSNE) with the reference similarity spectrum (RSS) profiles to the fetal  
1551 Brainspan data as the input. Cells are colored by cell type/cluster, species, institutions  
1552 generating the data, dorsal trajectory pseudotimes, and marker gene expression. (c) tSNE  
1553 plots for all fetal brain data to assess cell heterogeneity, with the RSS profiles to the fetal  
1554 Brainspan references as the input. Cells are colored by cell type/cluster, species, dorsal  
1555 excitatory neuron trajectory pseudotimes, and marker gene expression (d) Heatmap  
1556 showing marker gene expression patterns across different cell types in the droplet-based  
1557 organoid scRNA-seq data generated in this manuscript and the above described C1-based  
1558 scRNA-seq data.  
1559

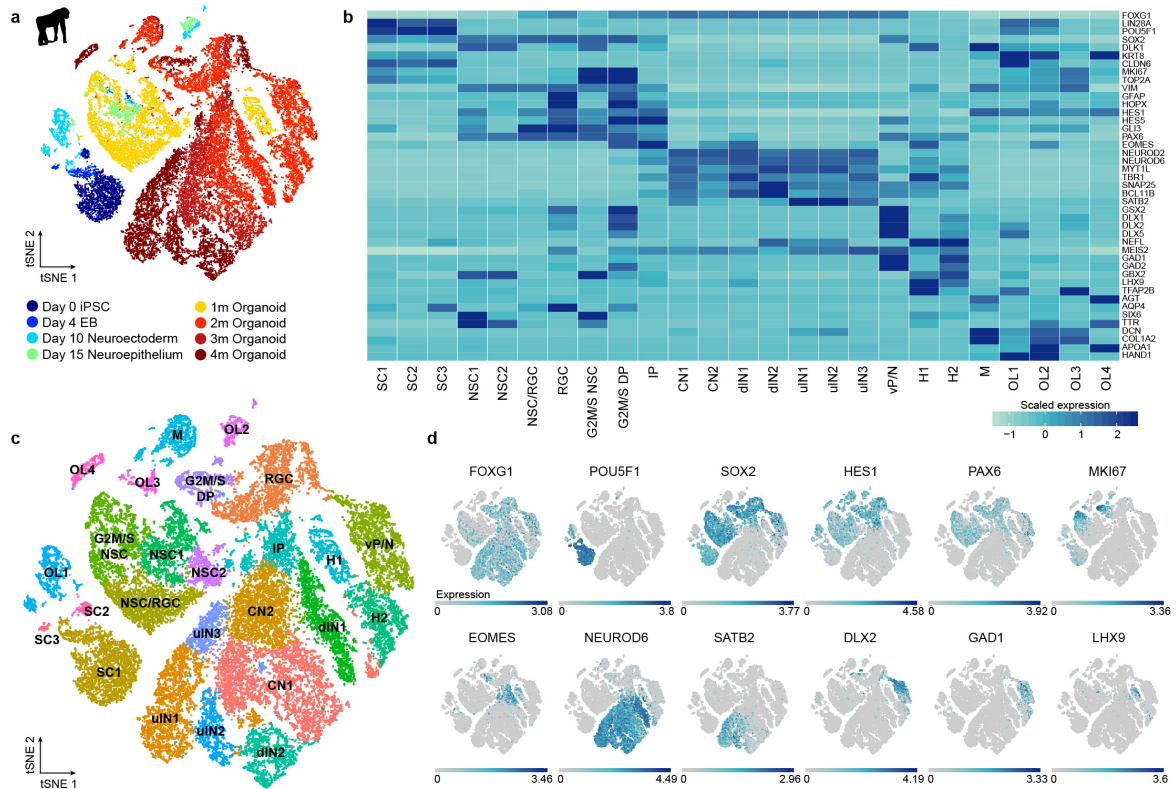

1560  
1561

1562 **Extended Data Figure 7: Heterogeneity analysis during chimp cerebral organoid**  
 1563 **development from pluripotency.** (a) Heterogeneity analysis for iPSC-derived chimpanzee  
 1564 cells from day 0 of differentiation to 4 months of organoid development for one cell line. (b)  
 1565 Heatmap visualizing averaged cluster expression for marker genes with columns ordered  
 1566 based on differentiation progress from early to late time points and regional identity sorted  
 1567 from dorsal to ventral forebrain to non-forebrain cells and non-ectodermal-derived cells. (c)  
 1568 Cluster identification and t-stochastic neighbor embedding using the top 15 principal  
 1569 components for clustering. Cluster assignment was based on cluster markers as well as  
 1570 expression patterns of known marker genes. SC – stem cells, NSC - neural stem cells,  
 1571 RGC – radial glia cells, G2M/S DP – dorsal progenitors in G2M/S phase, IP – intermediate  
 1572 progenitors, CN – cortical neuron, dlN – deep layer neuron, ulN – upper layer neurons, vP/N  
 1573 – ventral progenitor/neuron, H – hindbrain, M – mesenchymal-like cells, OL – off lineage  
 1574 cells, MIC - microglia. (d) tSNE plots colored based on gene expression of representative  
 1575 marker genes used to assign cluster identities.  
 1576

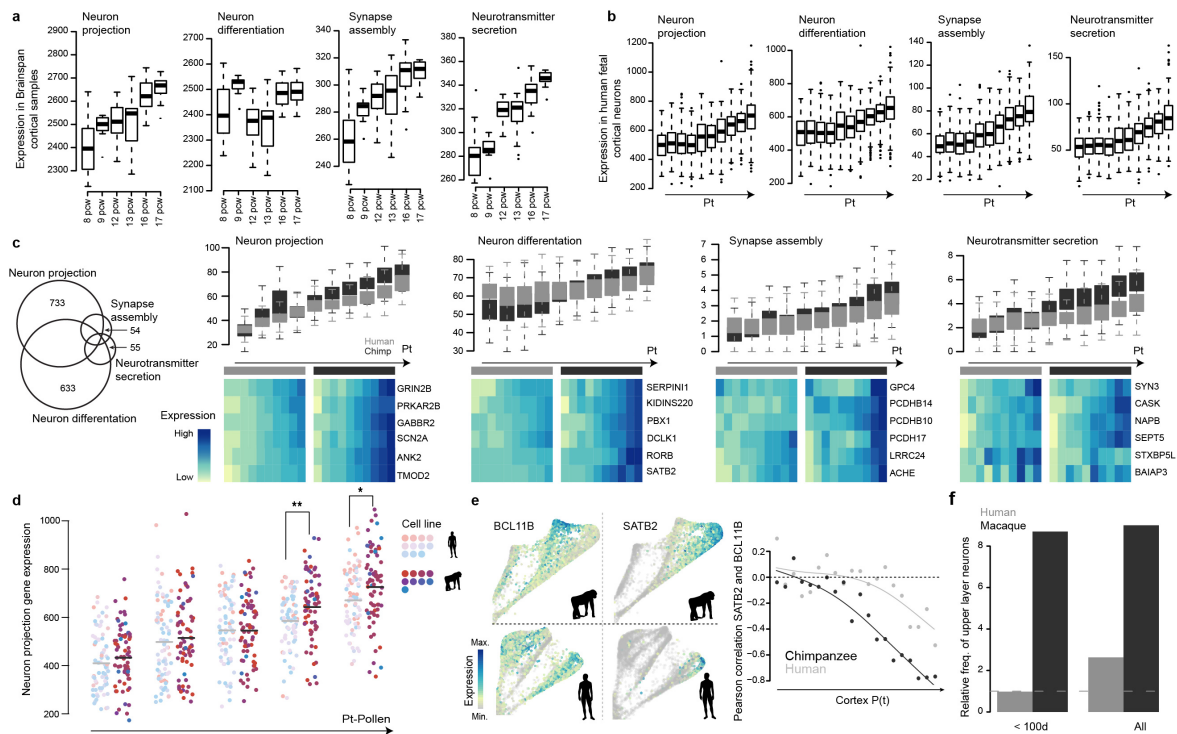

1577

1578

1579

**Extended Data Figure 8: Supplementary analysis on timing difference of neuron maturation in human and chimpanzee cerebral organoids.**

1580

(a) Boxplots (interquartile range with minimum and maximum, outliers removed) showing

1581

sum expression levels (in RPKM) of genes with Gene Ontology annotation ‘neuron

1582

projection’, ‘neuron differentiation’, ‘synapse assembly’ and ‘neurotransmitter secretion’ in

1583

Brainspan fetal cortical samples aged from 8 post conception weeks (pcw) to 17 pcw. (b)

1584

Boxplots showing sum expression levels of the same gene lists in fetal human dorsal

1585

excitatory neurons along the estimated developmental pseudotimes (Nowakowski et al.

1586

2017 data set). (c) Boxplots showing sum expression levels of genes with specific

1587

annotation to only one of the four GO terms in human and chimpanzee along the cortical

1588

pseudotimes. Heatmaps showing expression of example genes from the GO terms for

1589

human and chimp along pseudotime bins. The Venn diagram on the left shows the overlap

1590

of genes related to the four GO terms. (d) Distribution of neuron projection scores of human

1591

and chimpanzee cortical cells reported in Pollen et al. 2019 along the cortical pseudotimes.

1592

Each dot represents one cell, and is colored by the organoid cell line. Light colors represent

1593

human cell lines, and dark colors represent chimpanzee ones. Two-sided Wilcoxon’s rank

1594

sum test (\*:  $P < 0.1$ ; \*\*:  $P < 0.01$ ). (e) Observed timing difference of upper-deeper layer

1595

specification in human and chimpanzee cerebral organoids from 10X genomics data

1596

generated in this study. The left panel shows expression of cortical deep (BCL11B, left) and

1597

upper (SATB2, right) layer marker genes projected onto the chimpanzee (top) and human

1598

(bottom) SPRING plot. BCL11B and SATB2 become anti-correlated in their

1599

pseudotemporal expression profile in both human and chimpanzee (right), while the onset

1600

of anticorrelation happens earlier in chimpanzee than in human. (f) Abundance of upper

1601

layer neurons relative to deeper layer neurons in human and macaque fetal prefrontal

1602

cortex samples in Nowakowski et al. 2017 grouped by early time points (<100 days old) or

1603

all time points combined.

1604



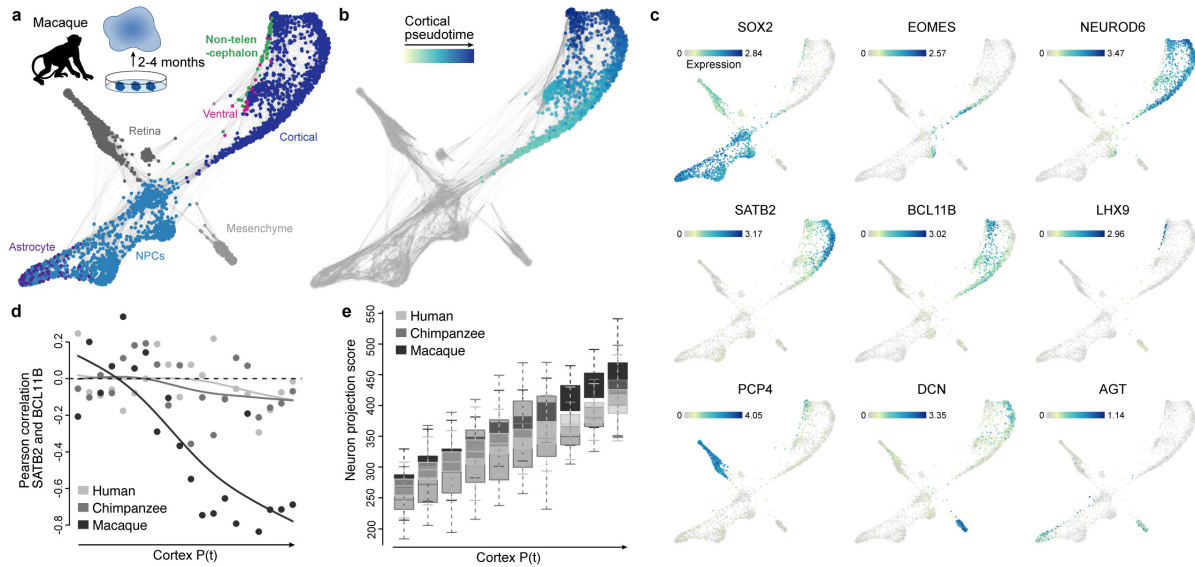

1605  
1606  
1607  
1608  
1609  
1610  
1611  
1612  
1613  
1614  
1615  
1616  
1617  
1618

**Extended Data Figure 9: Single-cell RNA-seq analysis of macaque cerebral organoids.**

(a) scRNA-seq was performed on 2 to 4-month cerebral organoids from a macaque iPSC line. The SPRING plot of pseudocells was constructed with the top 20 PCs as the input. The heterogeneity analysis suggests multiple cell types in the macaque organoids, including cortical neurons, NPCs, astrocytes and other cell types such as retina and mesenchyme-like cells. (b) SPRING plot colored by pseudotimes of cortical pseudocells, which are the pseudocells' quantiles of DC1 of the cortical pseudocells diffusion map. (c) SPRING plot colored by marker gene expression. (d) The onset of anti-correlation between SATB2 and BCL11B occurs earlier along the macaque pseudotime, relative to human and chimpanzee, when focusing on the 2-month cerebral organoids. (e) Boxplots (box, interquartile range (IQR); whisker, 1.5\*IQR) showing the neuron projection scores in human, chimpanzee and macaque along the unaligned cortical pseudotimes.



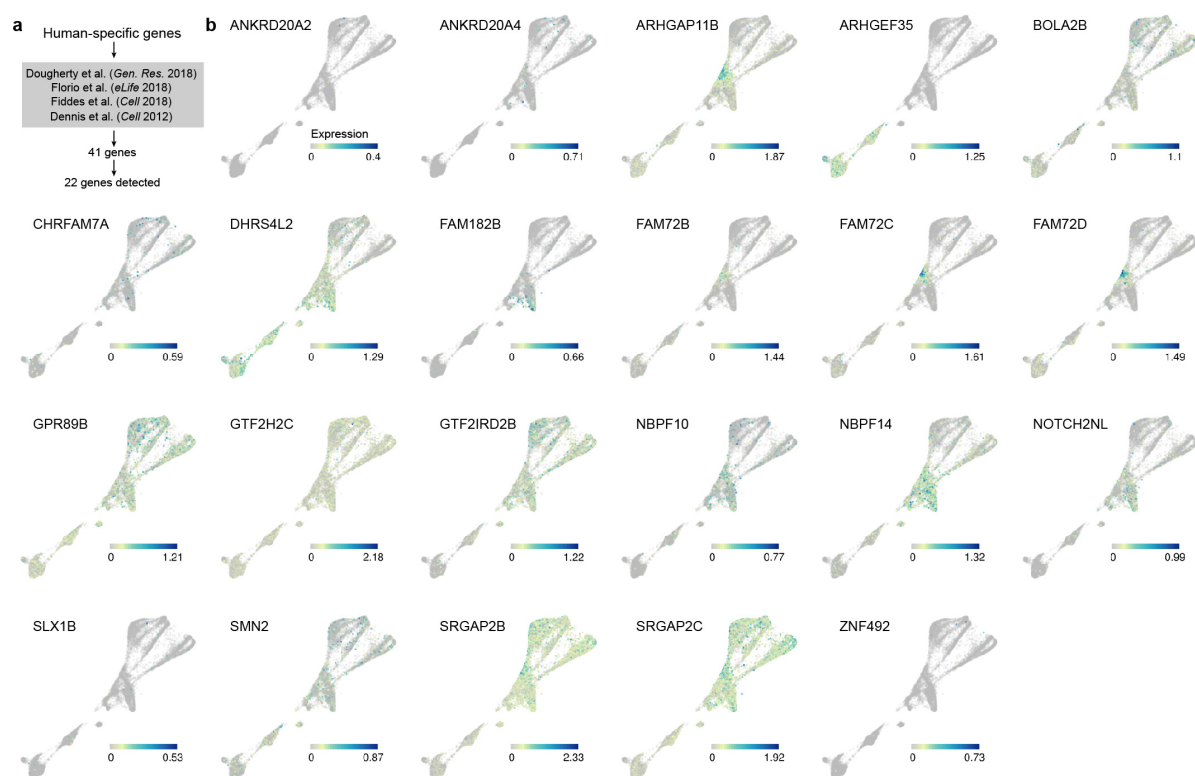

1619  
1620  
1621  
1622  
1623  
1624  
1625  
1626

**Extended Data Figure 10: Expression of human-specific genes along human organoid development from pluripotency.**

(a) Reported human-specific genes were collected from four previous publications, and the expression of these genes was analyzed along the human organoid developmental trajectory from pluripotency to 4 month old organoids. (b) SPRING plot colored by expression of the human-specific genes.

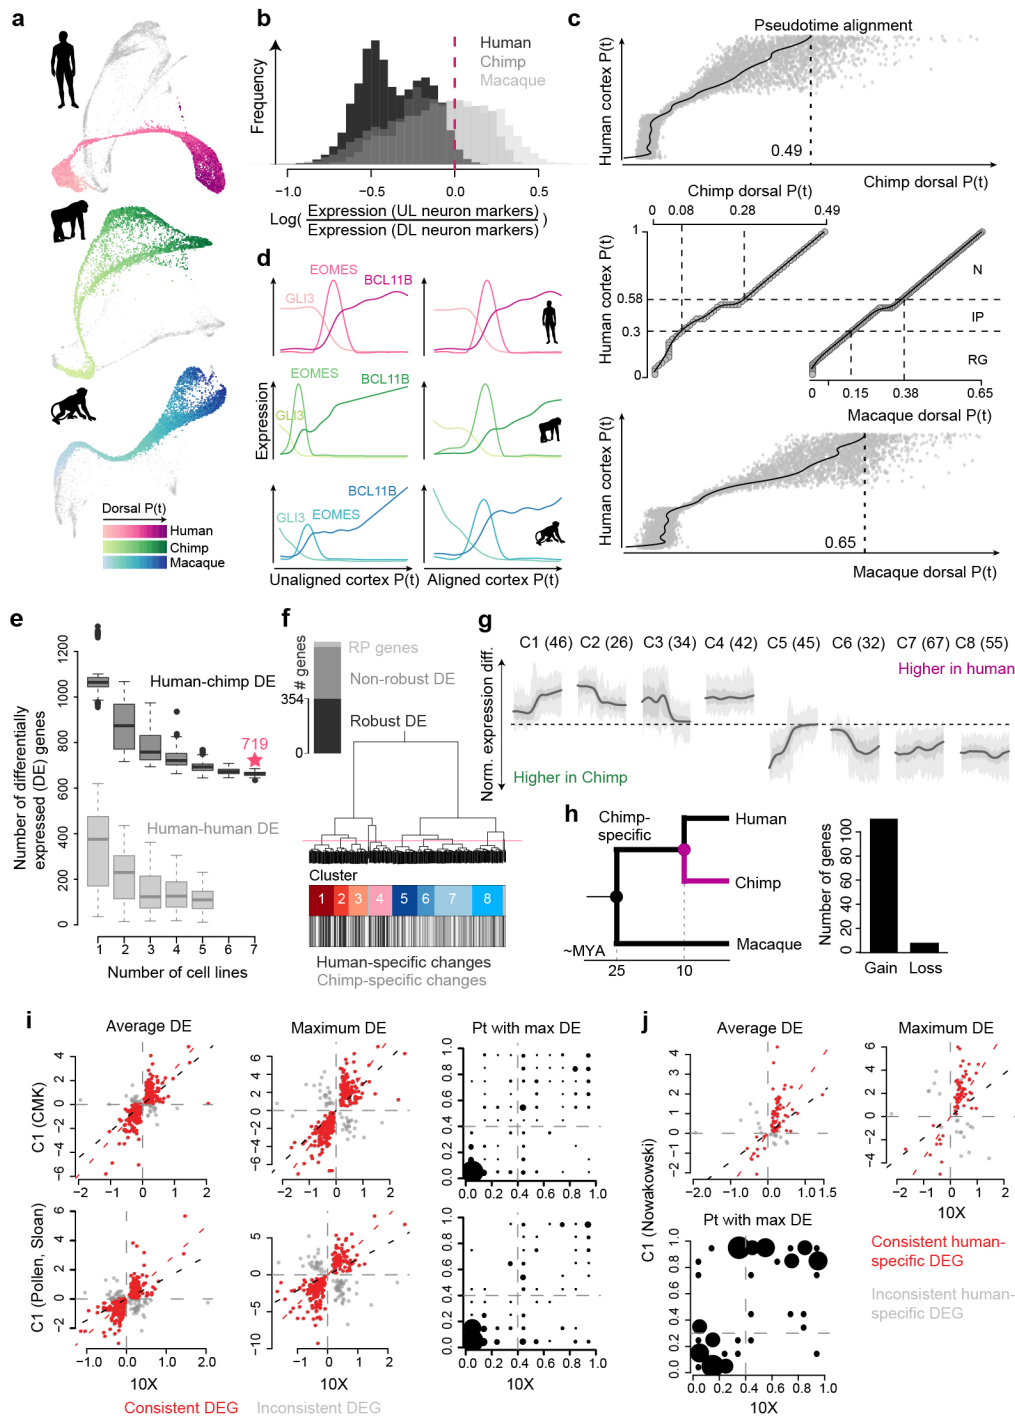

1627

1628

1629

1630

1631

1632

1633

1634

1635

1636

1637

### Extended Data Figure 11: Pseudotime alignment between primates and differential

**expression between human and chimpanzee.** (a) SPRING plots visualizing the kNN networks of human and chimpanzee pseudocells, and macaque cells, which represent neural progenitors (NPC) and neurons of different brain regions. Cortical NPCs and neurons are colored by their pseudotimes. (b) Ratios of upper layer (UL) to deeper layer (DL) neuron marker expression in human (black), chimpanzee (dark grey) and macaque (light grey) organoids. The dashed line indicates the cutoff applied to human pseudocells to filter out those representing UL neurons. (c) Truncated dynamic time warping (dtw)-based alignment was applied to align human, chimpanzee and macaque cortical pseudotime courses. Two support vector regression models were trained to predict chimpanzee (upper) and

1638 macaque (lower) pseudotimes of human pseudocells. A constrained B-splines regression  
1639 model was fitted to determine the trimming point at the chimpanzee and macaque  
1640 pseudotime courses, respectively. An end-to-end dtw-based alignment was applied to the  
1641 human pseudotime course to the trimmed chimpanzee and macaque pseudotime courses  
1642 for the final alignments (middle). (d) Pseudotemporal expression profiles of *GLI3*, *EOMES*  
1643 and *BCL11B* along the human, chimpanzee and macaque cortical pseudotimes, before  
1644 (left) and after (right) the pseudotime alignment procedures. (e) Robustness and false  
1645 positive rate of differential pseudotemporal expression between human and chimpanzee  
1646 based on the number of cell lines involved in the analysis with constrained replaceable  
1647 pseudocell subsampling. In each subsampling, pseudocells representing cells from a  
1648 certain number of human lines were sampled in a replaceable manner to recapitulate  
1649 pseudocell distribution along pseudotime course of the chimpanzee pseudocells.  
1650 Differential expression (DE) analysis was applied to compare all chimpanzee pseudocells  
1651 and the sampled human pseudocells to estimate robustness to cell line numbers (dark grey  
1652 boxes), and to compare sampled human pseudocells to human pseudocells from another  
1653 two lines sampled with the same procedure to estimate false positive rate (light grey  
1654 boxes). Boxplots: box, interquartile range (IQR); line,  $1.5 \times \text{IQR}$ ; dots, outliers. (f) Robustly  
1655 detected human-chimpanzee DE genes (robust DE genes) are defined as the non-  
1656 ribosomal genes which were detected as DE genes in at least 80% of the subsampling-  
1657 based human-chimpanzee DE analysis using any number of human lines (black). The  
1658 dendrogram shows the hierarchical clustering of robust DE genes, based on their human-  
1659 chimpanzee pseudotemporal DE patterns along the aligned pseudotimes of cortical  
1660 organoid pseudocells, resulting in eight clusters of robust DE genes. (g) Pseudotemporal  
1661 differential expression patterns between human and chimpanzee of the eight clusters of  
1662 genes along the pseudotimes of cortical organoid pseudocells with 50% and 95%  
1663 confidence intervals shown in dark and light grey, respectively. (h) Number of differentially  
1664 expressed genes in chimpanzee vs. human and macaque comparison grouped by gain or  
1665 loss of expression in chimpanzees. A gain of expression specifically in chimpanzees is  
1666 more likely than a loss of expression pattern conserved in the other primates. (i)  
1667 Comparison of the reported human-chimpanzee pseudotemporal DE based on 10X  
1668 Genomics data with the Fluidigm C1-based scRNA-seq data of human and chimpanzee  
1669 cerebral organoids. The two rows show the results based on C1 data generated in this  
1670 manuscript and combined with data from Camp et al. 2015<sup>17</sup>, Mora-Bermudez et al. 2016<sup>19</sup>,  
1671 Pollen et al. 2019<sup>21</sup>. The first two columns show estimated human-chimpanzee DE  
1672 directionality and magnitude in the reported droplet-based scRNA-seq data and the C1-  
1673 based measurement, with the first column presenting the generalized DE along the whole  
1674 cortical pseudotimes, and the second column presenting the maximum DE along the  
1675 pseudotimes. The red dots represent consistent DE genes, which have consistent DE  
1676 directionalities in the two data sets. The right panel shows pseudotime intervals with the  
1677 largest human-chimpanzee DE in the two data sets in comparison to the consistent DE  
1678 genes. Dot sizes represent frequencies. (j) Comparison of the estimated human-macaque  
1679 DE directionality and magnitude of the human-specific DE genes using human and  
1680 macaque fetal prefrontal cortex scRNA-seq data<sup>21,27</sup>.  
1681

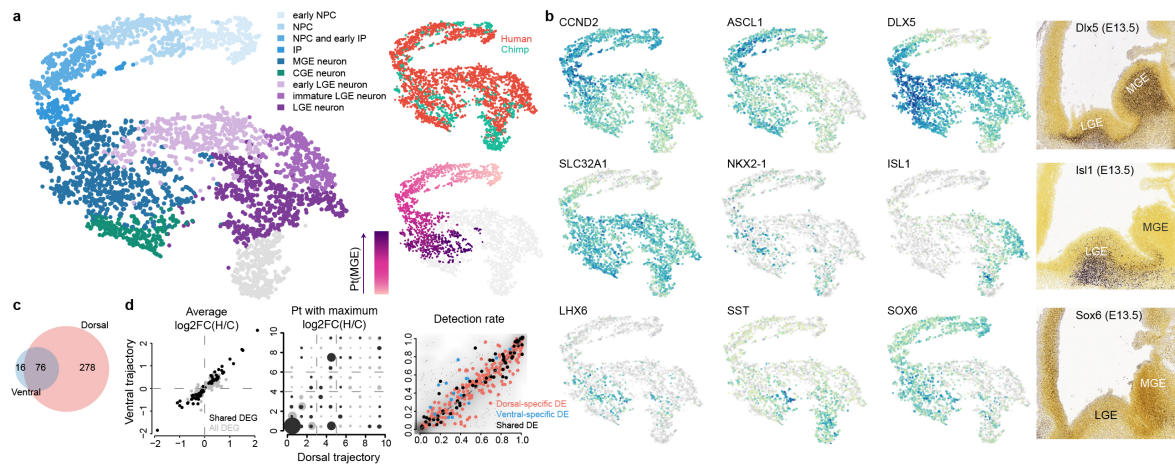

1682

1683

**Extended Data Figure 12: Organoid ventral forebrain cell heterogeneity and differential expression between human and chimpanzee.**

1684

1685 (a) Ventral forebrain cell heterogeneity in organoids was investigated by tSNE embeddings,  
1686 with RSS profiles of human and chimpanzee ventral pseudocells combined as the input.

1687 Pseudocell clusters were annotated based on marker gene expression. Pseudocells were  
1688 also colored by species and diffusion map based on medial ganglionic eminence (MGE)

1689 neuron developmental pseudotimes. (b) tSNE plots colored by marker gene expression,  
1690 and in situ hybridization images from the Allen Developing Mouse Brain Atlas showing

1691 expression of *Dlx5*, *Isl1* and *Sox6* in the mouse developing ventral forebrain (E13.5). (c)  
1692 Human-chimpanzee ventral DE genes are largely shared along the dorsal forebrain

1693 developmental trajectories. (d) Human-chimpanzee DE directionalities and magnitudes, and  
1694 DE genes detection rates on the two trajectories. DE directionalities and magnitudes are

1695 consistent on the dorsal and MGE trajectories, with most of the shared DE genes showing  
1696 the highest human-chimpanzee expression divergence at NPC. DE genes specifically

1697 detected on one trajectory have tendency of higher detection rates on the trajectory with  
1698 detected human-chimpanzee DE.

1699



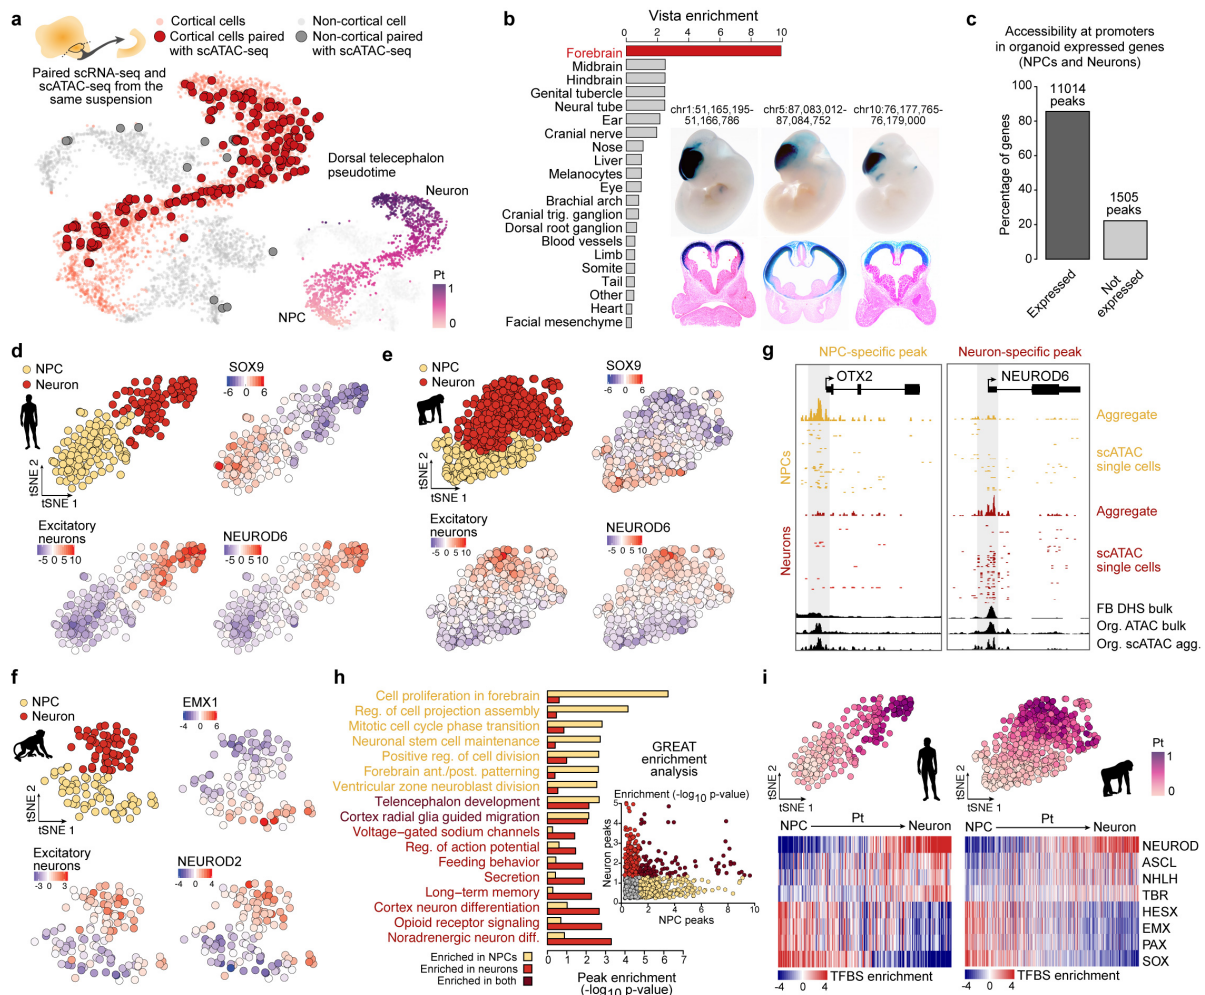

1700

1701

### Extended Data Figure 13: Chromatin accessibility in cerebral organoids.

1702

(a) t-SNE projection of highly variable gene expression in Fluidigm C1-based scRNA-seq

1703

data of cerebral organoids. Cortical cells are colored red, with larger points corresponding

1704

to cells with paired expression and chromatin accessibility data (data generated from the

1705

same cell suspension). 94.4% of cells with paired data are cortical, validating the cortical

1706

origins of the dissected cerebral organoid regions. (b) Cerebral organoid accessible peaks

1707

are significantly and highly enriched for overlapping human VISTA enhancers active in the

1708

forebrain relative to all other tissues (left). Three representative human VISTA enhancers

1709

with validated expression in E11.5 mouse forebrain that overlap cerebral organoid peaks

1710

are shown (out of 268 such enhancers). (c) Barplot showing the percentage of genes with

1711

accessible chromatin at the promoter of genes that are expressed or not expressed in

1712

human cerebral organoids. (d-f) t-SNE projection of bias-corrected deviations in

1713

accessibility for 7-mers within organoid scATAC-seq peaks per cell, with cells color coded

1714

by cell state (NPC, neuron) for human (d), chimpanzee (e), and macaque (f). Binding motif

1715

deviation Z-scores for representative transcription factors are shown, as well as deviation

1716

Z-scores for overlapping differentially accessible (DA) snATAC-seq peaks in mouse

1717

developing forebrain excitatory neurons<sup>71</sup>. (g) Signal intensity tracks of aggregated and

1718

individual single-cell chromatin accessibility data per cell state in human organoids at a

1719

NPC-specific promoter peak (left) and a neuron-specific promoter peak (right). For

1720

comparison, cerebral organoid bulk ATAC-seq chromatin accessibility data and human

1721

fetal brain bulk DNase-seq is shown. (h) Peaks identified as DA between NPC and neurons



1722 in human organoids were used as input for gene ontology enrichment analysis using the  
1723 tool GREAT. Barplot showing the enrichment of representative enriched biological process  
1724 gene ontology (GO) terms associated with human NPC DA peaks (gold) or human neuron  
1725 DA peaks (light red) relative to all human organoid accessible peaks. Each point in the  
1726 scatter plot represents a GO term and is colored by their enrichment in NPCs (yellow),  
1727 neurons (red), both (dark red), or neither (grey). (i) tSNE plots colored by pseudotime, and  
1728 heatmaps showing binding motif deviation Z-scores for selected transcription factors  
1729 (rows) in all cells (columns) ordered in pseudotime for human (left) and chimpanzee (right).

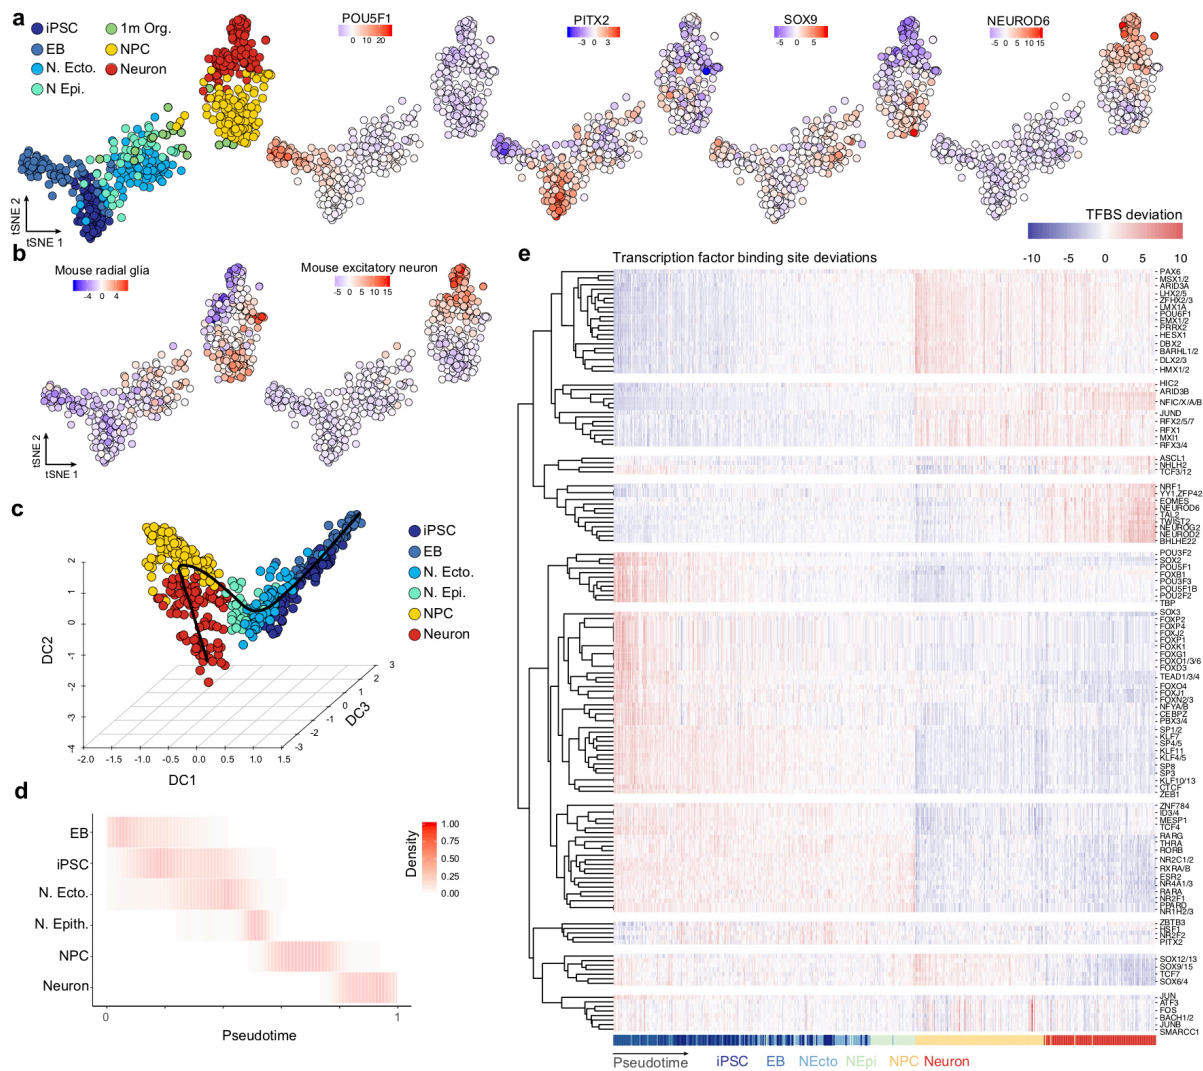

1730  
1731  
1732  
1733  
1734  
1735  
1736  
1737  
1738  
1739  
1740  
1741  
1742  
1743

**Extended Data Figure 14: Chromatin accessibility during development from pluripotency to cortex formation in human cerebral organoids.**

(a) t-SNE projection of bias-corrected deviations in accessibility for 7-mers within scATAC-seq peaks per cell, with cells color coded by time point, and organoid data color coded by cell state (NPC, neuron). Binding motif deviation Z-scores for representative transcription factors are shown to the right. (b) t-SNE plot with cells colored by their deviation Z-score for overlapping differentially accessible snATAC-seq peaks from mouse developing forebrain<sup>71</sup> radial glia cells (left) or excitatory neurons (right). (c) Diffusion map projection using the top 250 differentially accessible peaks per time point/cell state. The principle curve fit through the cells is shown as a black line. (d) Proportion of cells scaled by row is shown for each time point/cell state over pseudotime. (e) Heatmap representing the deviation Z-score of TF motifs that vary over the time course plotted for each cell across pseudotime.

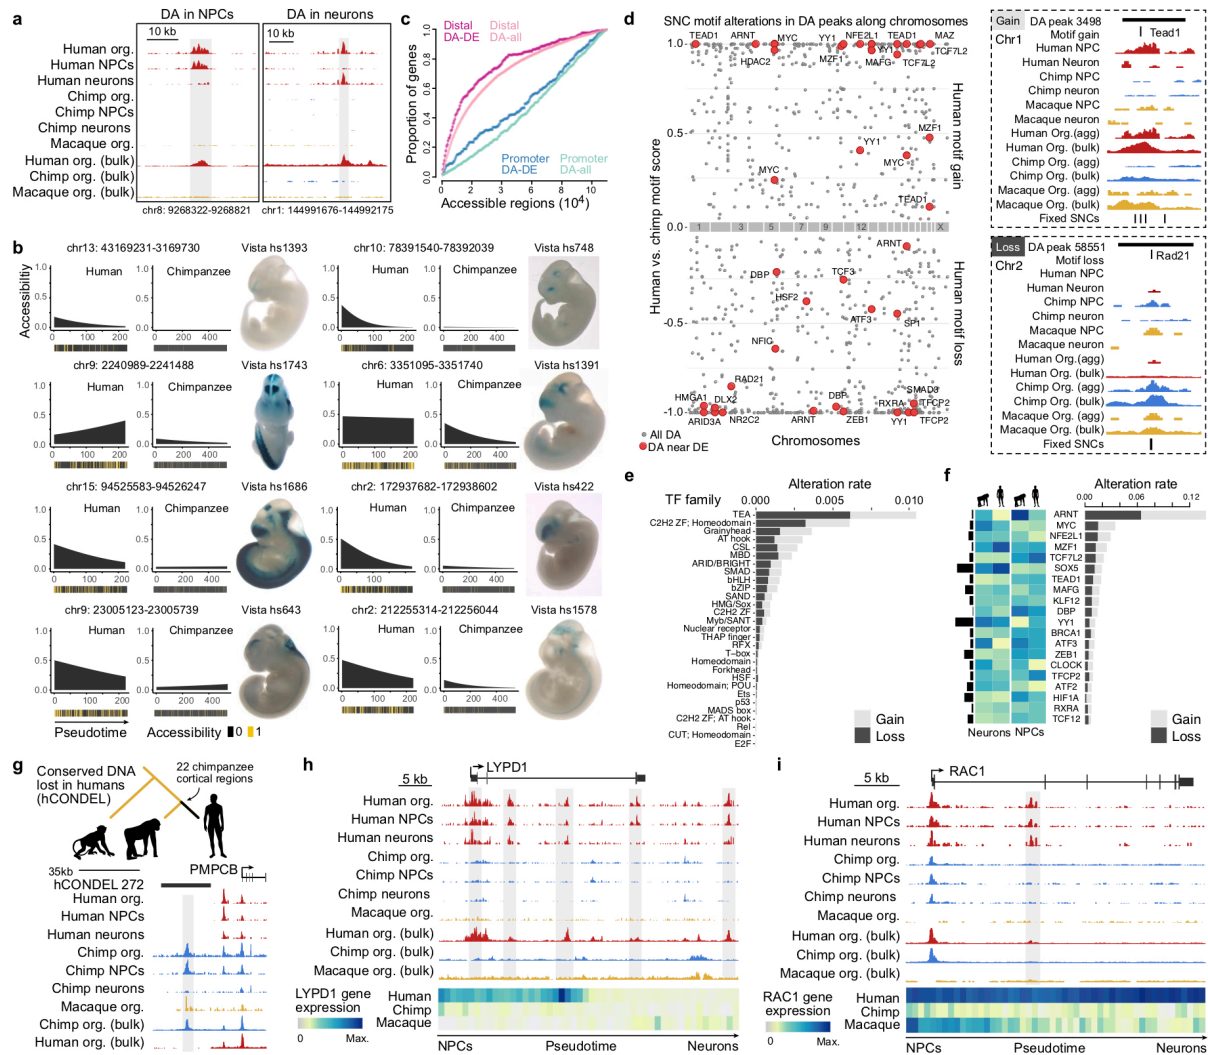

1744  
1745  
1746

**Extended Data Figure 15: Chromatin accessibility differences in human and chimpanzee cerebral organoids.**

1747  
1748  
1749  
1750  
1751  
1752  
1753  
1754  
1755  
1756  
1757  
1758  
1759  
1760  
1761  
1762  
1763

(a) Signal intensity tracks of aggregated single-cell and bulk chromatin accessibility data from human, chimpanzee, and macaque at a human-specific NPC-specific differentially accessible (DA) peak (left) and a human-specific neuron-specific DA peak (right). (b) The 8 most significant human-chimp organoid DA peaks containing a fixed SNC and accessible only in the cerebral organoid stage that overlap a VISTA human enhancer with validated activity in the developing mouse forebrain (out of 68 such cases). For each DA peak, the accessibility across pseudotime is shown for human and chimpanzee with heatmaps depicting cells where the peak is accessible (yellow) or inaccessible (black). The expression pattern of the overlapping VISTA enhancer in E11.5 mouse embryos is shown to the right. (c) Shown are the proportion of differentially expressed (DE) genes (dark color) or all expressed genes as background (light color) with a human-chimp organoid DA peak overlapping the promoter region (blue) or is distal to the promoter region (pink). The plot shows that DE genes between human and chimpanzee organoids are more likely to have a nearby DA peak than background. (d) Fixed SNCs predicted to significantly alter transcription factor binding within human-chimp organoid DA peaks, with the name of the altered motif shown for peaks linked to DE genes (red points). On the right, signal intensity tracks for a human motif gain (top) and human motif loss (bottom) within a human-chimp

1764 DA peak. (e) Altered transcription factor motifs grouped by family plotted for their alteration  
1765 rate, which is the number of times a family member's motif is altered in human-chimp  
1766 organoid DA peaks divided by the number of times it's detected in all accessible organoid  
1767 peaks. (f) 20 transcription factors with the highest alteration rate, which is the number of  
1768 times a motif is altered in human-chimp organoid DA peaks divided by the number of times  
1769 it's detected in all accessible organoids peaks. Heatmaps show their expression level in  
1770 human and chimpanzee NPCs and neurons, with the bars to the left representing the  
1771 average expression level across NPCs and neurons. (g) Example of an accessible peak in  
1772 chimpanzee and macaque that overlaps a computationally-verified, non-polymorphic  
1773 human conserved deletion (hCONDEL). (h-i) Signal intensity tracks of aggregated single-cell  
1774 or bulk chromatin accessibility data from human, chimpanzee and macaque for two genes,  
1775 (h) LYPD1 and (i) RAC1, that have higher expression specifically in humans. Gene  
1776 expression is shown in heatmaps (below).



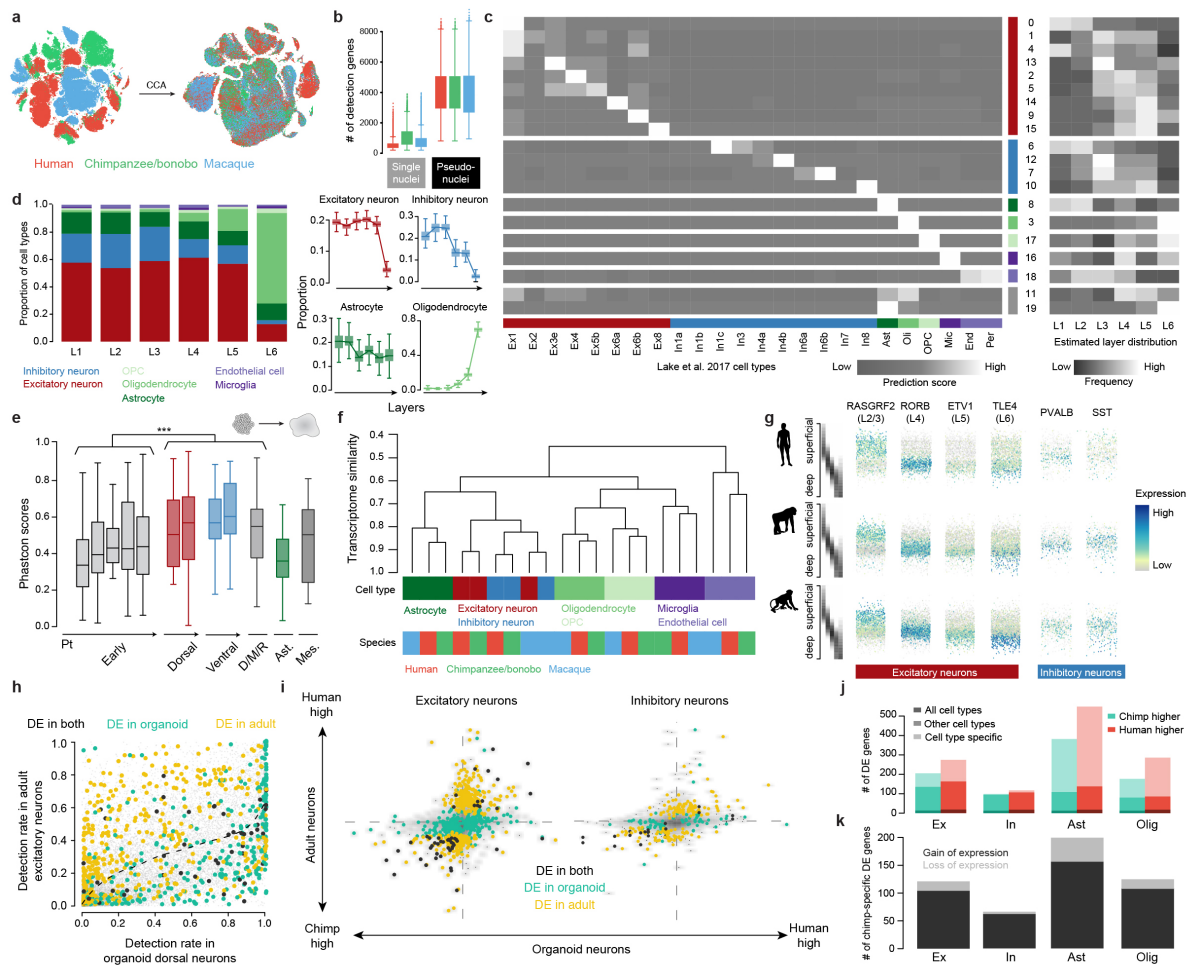

1777

1778

1779

1780

1781

1782

1783

1784

1785

1786

1787

1788

1789

1790

1791

1792

1793

1794

1795

1796

1797

1798

### Extended Data Figure 16: Supplementary analysis of human, chimpanzee and macaque adult brain single-nucleus RNA-seq.

(a) The snRNA-seq data of adult brains in human, chimpanzee/bonobo and macaque were integrated using Seurat v3. (b) Boxplots (box, interquartile range (IQR); whisker, 1.5\*IQR) showing the number of detected genes in single nuclei and pseudonuclei. (c) Heatmap showing the average prediction scores of each of the 20 identified clusters to each of the cell types reported by Lake et al. 2017, as well as their estimated distributions in different cortical layers in humans. Clusters are grouped in major cell classes. (d) Cell type composition of layers and layer distribution of cell types in human. (Left) Stacked bars showing the estimated cell type composition of different layers. (Right) Boxplots (box, interquartile range (IQR); whisker, 1.5\*IQR) showing the estimated proportion per layer for four cell classes: excitatory neurons, inhibitory neurons, astrocytes and oligodendrocytes. (e) Genomic conservation based on average phastCon scores of developmental stage markers from iPSCs to neurons in human cerebral organoids (\*\*\*: two-sided Wilcoxon's rank sum test,  $P < 0.0001$ ). (f) Hierarchical clustering of the average transcriptome of seven cell classes in the three species. (g) Expression of layer markers (RASGRF2, RORB, ETV1, TLE4) in excitatory neurons and inhibitory neuron subtype markers (PVALB, SST) in inhibitory neurons, along the predicted laminar origin of the pseudonuclei in human, chimpanzee/bonobo and macaque. (h) Comparison of gene detection rates in organoid dorsal neurons and adult excitatory neurons, with human-chimpanzee DE genes in adult excitatory neurons colored in yellow, DE genes in organoid dorsal neurons colored in

1799 green, and shared DE genes colored in black. The dashed curve shows the fitted  
1800 relationship between the two systems using all genes. Area below the curve represents  
1801 higher detection rate in organoid neurons than adult neurons, and that above the curve  
1802 represents higher detection rate in adult neurons. (i) Comparison of human-chimpanzee DE  
1803 (left) between organoid dorsal neurons and adult excitatory neurons, as well as (right)  
1804 between organoid ventral MGE neurons and adult inhibitory neurons. Densities are shown  
1805 as grey scale shadows, with human-chimpanzee DE genes highlighted (yellow: DE only in  
1806 adult; green: DE only in organoids; black: DE in both). (j) Number of human and chimp  
1807 differentially expressed genes for cell classes based on all cell types, a subset of cell types  
1808 and specific cell types. (k) Number of chimpanzee-specific DE genes across cell classes.  
1809 The majority of the chimpanzee-specific DE genes have gain of expression (dark) rather  
1810 than loss of expression (light).  
1811  
1812

1813

1814 **REFERENCES**

1815

- 1816 1 Sousa, A. M. M., Meyer, K. A., Santpere, G., Gulden, F. O. & Sestan, N. Evolution of  
1817 the Human Nervous System Function, Structure, and Development. *Cell* **170**, 226-  
1818 247, doi:10.1016/j.cell.2017.06.036 (2017).
- 1819 2 Geschwind, D. H. & Rakic, P. Cortical evolution: judge the brain by its cover. *Neuron*  
1820 **80**, 633-647, doi:10.1016/j.neuron.2013.10.045 (2013).
- 1821 3 Martin, R. D. Relative brain size and basal metabolic rate in terrestrial vertebrates.  
1822 *Nature* **293**, 57-60 (1981).
- 1823 4 Paabo, S. The human condition-a molecular approach. *Cell* **157**, 216-226,  
1824 doi:10.1016/j.cell.2013.12.036 (2014).
- 1825 5 Preuss, T. M. The human brain: rewired and running hot. *Annals of the New York*  
1826 *Academy of Sciences* **1225 Suppl 1**, E182-191, doi:10.1111/j.1749-  
1827 6632.2011.06001.x (2011).
- 1828 6 Somel, M., Liu, X. & Khaitovich, P. Human brain evolution: transcripts, metabolites  
1829 and their regulators. *Nat Rev Neurosci* **14**, 112-127, doi:10.1038/nrn3372 (2013).
- 1830 7 Lui, J. H., Hansen, D. V. & Kriegstein, A. R. Development and evolution of the  
1831 human neocortex. *Cell* **146**, 18-36, doi:10.1016/j.cell.2011.06.030 (2011).
- 1832 8 Florio, M. & Huttner, W. B. Neural progenitors, neurogenesis and the evolution of the  
1833 neocortex. *Development* **141**, 2182-2194, doi:10.1242/dev.090571 (2014).
- 1834 9 He, Z. *et al.* Comprehensive transcriptome analysis of neocortical layers in humans,  
1835 chimpanzees and macaques. *Nature neuroscience* **20**, 886-895,  
1836 doi:10.1038/nn.4548 (2017).
- 1837 10 Sousa, A. M. M. *et al.* Molecular and cellular reorganization of neural circuits in the  
1838 human lineage. *Science* **358**, 1027-1032, doi:10.1126/science.aan3456 (2017).
- 1839 11 Somel, M. *et al.* Transcriptional neoteny in the human brain. *Proceedings of the*  
1840 *National Academy of Sciences of the United States of America* **106**, 5743-5748,  
1841 doi:10.1073/pnas.0900544106 (2009).
- 1842 12 Brawand, D. *et al.* The evolution of gene expression levels in mammalian organs.  
1843 *Nature* **478**, 343-348, doi:10.1038/nature10532 (2011).
- 1844 13 Konopka, G. *et al.* Human-specific transcriptional networks in the brain. *Neuron* **75**,  
1845 601-617, doi:10.1016/j.neuron.2012.05.034 (2012).
- 1846 14 Zhu, Y. *et al.* Spatiotemporal transcriptomic divergence across human and macaque  
1847 brain development. *Science* **362**, doi:10.1126/science.aat8077 (2018).
- 1848 15 Lancaster, M. A. *et al.* Cerebral organoids model human brain development and  
1849 microcephaly. *Nature* **501**, 373-379, doi:10.1038/nature12517 (2013).
- 1850 16 Marchetto, M. C. *et al.* Differential L1 regulation in pluripotent stem cells of humans  
1851 and apes. *Nature* **503**, 525-529, doi:10.1038/nature12686 (2013).
- 1852 17 Camp, J. G. *et al.* Human cerebral organoids recapitulate gene expression programs  
1853 of fetal neocortex development. *Proceedings of the National Academy of Sciences of*  
1854 *the United States of America* **112**, 15672-15677, doi:10.1073/pnas.1520760112  
1855 (2015).
- 1856 18 Otani, T., Marchetto, M. C., Gage, F. H., Simons, B. D. & Livesey, F. J. 2D and 3D  
1857 Stem Cell Models of Primate Cortical Development Identify Species-Specific  
1858 Differences in Progenitor Behavior Contributing to Brain Size. *Cell stem cell* **18**, 467-  
1859 480, doi:10.1016/j.stem.2016.03.003 (2016).
- 1860 19 Mora-Bermudez, F. *et al.* Differences and similarities between human and  
1861 chimpanzee neural progenitors during cerebral cortex development. *eLife* **5**,  
1862 doi:10.7554/eLife.18683 (2016).
- 1863 20 Kronenberg, Z. N. *et al.* High-resolution comparative analysis of great ape genomes.  
1864 *Science* **360**, doi:10.1126/science.aar6343 (2018).
- 1865 21 Pollen, A. A. *et al.* Establishing Cerebral Organoids as Models of Human-Specific  
1866 Brain Evolution. *Cell* **176**, 743-756 e717, doi:10.1016/j.cell.2019.01.017 (2019).

- 1867 22 Amiri, A. *et al.* Transcriptome and epigenome landscape of human cortical  
1868 development modeled in organoids. *Science* **362**, doi:10.1126/science.aat6720  
1869 (2018).
- 1870 23 Quadrato, G. *et al.* Cell diversity and network dynamics in photosensitive human  
1871 brain organoids. *Nature* **545**, 48-53, doi:10.1038/nature22047 (2017).
- 1872 24 Birey, F. *et al.* Assembly of functionally integrated human forebrain spheroids. *Nature*  
1873 **545**, 54-59, doi:10.1038/nature22330 (2017).
- 1874 25 Weinreb, C., Wolock, S. & Klein, A. M. SPRING: a kinetic interface for visualizing  
1875 high dimensional single-cell expression data. *Bioinformatics* **34**, 1246-1248,  
1876 doi:10.1093/bioinformatics/btx792 (2018).
- 1877 26 Miller, J. A. *et al.* Transcriptional landscape of the prenatal human brain. *Nature* **508**,  
1878 199-206, doi:10.1038/nature13185 (2014).
- 1879 27 Nowakowski, T. J. *et al.* Spatiotemporal gene expression trajectories reveal  
1880 developmental hierarchies of the human cortex. *Science* **358**, 1318-1323,  
1881 doi:10.1126/science.aap8809 (2017).
- 1882 28 La Manno, G. *et al.* RNA velocity of single cells. *Nature* **560**, 494-498,  
1883 doi:10.1038/s41586-018-0414-6 (2018).
- 1884 29 Bakken, T. E. *et al.* A comprehensive transcriptional map of primate brain  
1885 development. *Nature* **535**, 367-375, doi:10.1038/nature18637 (2016).
- 1886 30 Renner, M. *et al.* Self-organized developmental patterning and differentiation in  
1887 cerebral organoids. *EMBO J*, doi:10.15252/embj.201694700 (2017).
- 1888 31 Marchetto, M. C. *et al.* Species-specific maturation profiles of human, chimpanzee  
1889 and bonobo neural cells. *eLife* **8**, doi:10.7554/eLife.37527 (2019).
- 1890 32 Leigh, S. R. Brain growth, life history, and cognition in primate and human evolution.  
1891 *American journal of primatology* **62**, 139-164, doi:10.1002/ajp.20012 (2004).
- 1892 33 Gould, S. J. *Ontogeny and Phylogeny*. (Harvard University Press, 1977).
- 1893 34 Dougherty, M. L. *et al.* Transcriptional fates of human-specific segmental  
1894 duplications in brain. *Genome research* **28**, 1566-1576, doi:10.1101/gr.237610.118  
1895 (2018).
- 1896 35 Florio, M. *et al.* Evolution and cell-type specificity of human-specific genes  
1897 preferentially expressed in progenitors of fetal neocortex. *eLife* **7**,  
1898 doi:10.7554/eLife.32332 (2018).
- 1899 36 Fiddes, I. T. *et al.* Human-Specific NOTCH2NL Genes Affect Notch Signaling and  
1900 Cortical Neurogenesis. *Cell* **173**, 1356-1369 e1322, doi:10.1016/j.cell.2018.03.051  
1901 (2018).
- 1902 37 Dennis, M. Y. *et al.* Evolution of human-specific neural SRGAP2 genes by  
1903 incomplete segmental duplication. *Cell* **149**, 912-922, doi:10.1016/j.cell.2012.03.033  
1904 (2012).
- 1905 38 Florio, M. *et al.* Human-specific gene ARHGAP11B promotes basal progenitor  
1906 amplification and neocortex expansion. *Science* **347**, 1465-1470,  
1907 doi:10.1126/science.aaa1975 (2015).
- 1908 39 Roadmap Epigenomics, C. *et al.* Integrative analysis of 111 reference human  
1909 epigenomes. *Nature* **518**, 317-330, doi:10.1038/nature14248 (2015).
- 1910 40 Schep, A. N., Wu, B., Buenrostro, J. D. & Greenleaf, W. J. chromVAR: inferring  
1911 transcription-factor-associated accessibility from single-cell epigenomic data. *Nature*  
1912 *methods* **14**, 975-978, doi:10.1038/nmeth.4401 (2017).
- 1913 41 Visel, A., Minovitsky, S., Dubchak, I. & Pennacchio, L. A. VISTA Enhancer Browser--  
1914 a database of tissue-specific human enhancers. *Nucleic acids research* **35**, D88-92,  
1915 doi:10.1093/nar/gkl822 (2007).
- 1916 42 Villar, D. *et al.* Enhancer evolution across 20 mammalian species. *Cell* **160**, 554-566,  
1917 doi:10.1016/j.cell.2015.01.006 (2015).
- 1918 43 Reilly, S. K. *et al.* Evolutionary genomics. Evolutionary changes in promoter and  
1919 enhancer activity during human corticogenesis. *Science* **347**, 1155-1159,  
1920 doi:10.1126/science.1260943 (2015).



- 1921 44 Prufer, K. *et al.* The complete genome sequence of a Neanderthal from the Altai  
1922 Mountains. *Nature* **505**, 43-49, doi:10.1038/nature12886 (2014).
- 1923 45 Lindblad-Toh, K. *et al.* A high-resolution map of human evolutionary constraint using  
1924 29 mammals. *Nature* **478**, 476-482, doi:10.1038/nature10530 (2011).
- 1925 46 Prabhakar, S., Noonan, J. P., Paabo, S. & Rubin, E. M. Accelerated evolution of  
1926 conserved noncoding sequences in humans. *Science* **314**, 786,  
1927 doi:10.1126/science.1130738 (2006).
- 1928 47 Gittelman, R. M. *et al.* Comprehensive identification and analysis of human  
1929 accelerated regulatory DNA. *Genome research* **25**, 1245-1255,  
1930 doi:10.1101/gr.192591.115 (2015).
- 1931 48 McLean, C. Y. *et al.* Human-specific loss of regulatory DNA and the evolution of  
1932 human-specific traits. *Nature* **471**, 216-219, doi:10.1038/nature09774 (2011).
- 1933 49 Tekinay, A. B. *et al.* A role for LYNX2 in anxiety-related behavior. *Proceedings of the*  
1934 *National Academy of Sciences of the United States of America* **106**, 4477-4482,  
1935 doi:10.1073/pnas.0813109106 (2009).
- 1936 50 Reijnders, M. R. F. *et al.* RAC1 Missense Mutations in Developmental Disorders with  
1937 Diverse Phenotypes. *American journal of human genetics* **101**, 466-477,  
1938 doi:10.1016/j.ajhg.2017.08.007 (2017).
- 1939 51 Stuart, T. *et al.* Comprehensive integration of single cell data. *bioRxiv*, 460147,  
1940 doi:10.1101/460147 (2018).
- 1941 52 di Gregorio, M. C. *et al.* pH sensitive tubules of a bile acid derivative: a tubule  
1942 opening by release of wall leaves. *Physical chemistry chemical physics : PCCP* **15**,  
1943 7560-7566, doi:10.1039/c3cp00121k (2013).
- 1944 53 Halevi, S. *et al.* Conservation within the RIC-3 gene family. Effectors of mammalian  
1945 nicotinic acetylcholine receptor expression. *The Journal of biological chemistry* **278**,  
1946 34411-34417, doi:10.1074/jbc.M300170200 (2003).
- 1947 54 Kilpinen, H. *et al.* Common genetic variation drives molecular heterogeneity in  
1948 human iPSCs. *Nature* **546**, 370-375, doi:10.1038/nature22403 (2017).
- 1949 55 Thomson, J. A. *et al.* Embryonic stem cell lines derived from human blastocysts.  
1950 *Science* **282**, 1145-1147 (1998).
- 1951 56 Okita, K. *et al.* An efficient nonviral method to generate integration-free human-  
1952 induced pluripotent stem cells from cord blood and peripheral blood cells. *Stem Cells*  
1953 **31**, 458-466, doi:10.1002/stem.1293 (2013).
- 1954 57 Picelli, S. *et al.* Smart-seq2 for sensitive full-length transcriptome profiling in single  
1955 cells. *Nature methods* **10**, 1096-1098, doi:10.1038/nmeth.2639 (2013).
- 1956 58 Kang, H. M. *et al.* Multiplexed droplet single-cell RNA-sequencing using natural  
1957 genetic variation. *Nature biotechnology*, doi:10.1038/nbt.4042 (2017).
- 1958 59 Butler, A., Hoffman, P., Smibert, P., Papalexi, E. & Satija, R. Integrating single-cell  
1959 transcriptomic data across different conditions, technologies, and species. *Nature*  
1960 *biotechnology* **36**, 411-420, doi:10.1038/nbt.4096 (2018).
- 1961 60 Angerer, P. *et al.* destiny: diffusion maps for large-scale single-cell data in R.  
1962 *Bioinformatics* **32**, 1241-1243, doi:10.1093/bioinformatics/btv715 (2016).
- 1963 61 He, Z., Bammann, H., Han, D., Xie, G. & Khaitovich, P. Conserved expression of  
1964 lincRNA during human and macaque prefrontal cortex development and maturation.  
1965 *Rna* **20**, 1103-1111, doi:10.1261/rna.043075.113 (2014).
- 1966 62 Buenrostro, J. D., Giresi, P. G., Zaba, L. C., Chang, H. Y. & Greenleaf, W. J.  
1967 Transposition of native chromatin for fast and sensitive epigenomic profiling of open  
1968 chromatin, DNA-binding proteins and nucleosome position. *Nature methods* **10**,  
1969 1213-1218, doi:10.1038/nmeth.2688 (2013).
- 1970 63 Buenrostro, J. D. *et al.* Single-cell chromatin accessibility reveals principles of  
1971 regulatory variation. *Nature* **523**, 486-490, doi:10.1038/nature14590 (2015).
- 1972 64 Renaud, G., Stenzel, U. & Kelso, J. leeHom: adaptor trimming and merging for  
1973 Illumina sequencing reads. *Nucleic acids research* **42**, e141, doi:10.1093/nar/gku699  
1974 (2014).

1975 65 Renaud, G., Stenzel, U., Maricic, T., Wiebe, V. & Kelso, J. deML: robust  
1976 demultiplexing of Illumina sequences using a likelihood-based approach.  
1977 *Bioinformatics* **31**, 770-772, doi:10.1093/bioinformatics/btu719 (2015).  
1978 66 Li, H. *et al.* The Sequence Alignment/Map format and SAMtools. *Bioinformatics* **25**,  
1979 2078-2079, doi:10.1093/bioinformatics/btp352 (2009).  
1980 67 Consortium, E. P. An integrated encyclopedia of DNA elements in the human  
1981 genome. *Nature* **489**, 57-74, doi:10.1038/nature11247 (2012).  
1982 68 Zhang, Y. *et al.* Model-based analysis of ChIP-Seq (MACS). *Genome biology* **9**,  
1983 R137, doi:10.1186/gb-2008-9-9-r137 (2008).  
1984 69 Robinson, J. T. *et al.* Integrative genomics viewer. *Nature biotechnology* **29**, 24-26,  
1985 doi:10.1038/nbt.1754 (2011).  
1986 70 Pliner, H. A. *et al.* Cicero Predicts cis-Regulatory DNA Interactions from Single-Cell  
1987 Chromatin Accessibility Data. *Molecular cell* **71**, 858-871 e858,  
1988 doi:10.1016/j.molcel.2018.06.044 (2018).  
1989 71 Preissl, S. *et al.* Single-nucleus analysis of accessible chromatin in developing  
1990 mouse forebrain reveals cell-type-specific transcriptional regulation. *Nature*  
1991 *neuroscience* **21**, 432-439, doi:10.1038/s41593-018-0079-3 (2018).  
1992 72 Suzuki, K. *et al.* Targeted gene correction minimally impacts whole-genome  
1993 mutational load in human-disease-specific induced pluripotent stem cell clones. *Cell*  
1994 *stem cell* **15**, 31-36, doi:10.1016/j.stem.2014.06.016 (2014).  
1995 73 Mayer, C. *et al.* Developmental diversification of cortical inhibitory interneurons.  
1996 *Nature* **555**, 457-462, doi:10.1038/nature25999 (2018).  
1997 74 McLean, C. Y. *et al.* GREAT improves functional interpretation of cis-regulatory  
1998 regions. *Nature biotechnology* **28**, 495-501, doi:10.1038/nbt.1630 (2010).  
1999 75 Quinlan, A. R. & Hall, I. M. BEDTools: a flexible suite of utilities for comparing  
2000 genomic features. *Bioinformatics* **26**, 841-842, doi:10.1093/bioinformatics/btq033  
2001 (2010).  
2002 76 Cagan, A. *et al.* Natural Selection in the Great Apes. *Molecular biology and evolution*  
2003 **33**, 3268-3283, doi:10.1093/molbev/msw215 (2016).  
2004 77 Peyregne, S., Boyle, M. J., Dannemann, M. & Prufer, K. Detecting ancient positive  
2005 selection in humans using extended lineage sorting. *Genome research*,  
2006 doi:10.1101/gr.219493.116 (2017).  
2007 78 Chintalapati, M., Dannemann, M. & Prufer, K. Using the Neandertal genome to study  
2008 the evolution of small insertions and deletions in modern humans. *BMC evolutionary*  
2009 *biology* **17**, 179, doi:10.1186/s12862-017-1018-8 (2017).  
2010 79 Fu, Y. *et al.* FunSeq2: a framework for prioritizing noncoding regulatory variants in  
2011 cancer. *Genome biology* **15**, 480, doi:10.1186/s13059-014-0480-5 (2014).  
2012 80 Lambert, S. A. *et al.* The Human Transcription Factors. *Cell* **172**, 650-665,  
2013 doi:10.1016/j.cell.2018.01.029 (2018).  
2014 81 Yu, Q. & He, Z. Comprehensive investigation of temporal and autism-associated cell  
2015 type composition-dependent and independent gene expression changes in human  
2016 brains. *Scientific reports* **7**, 4121, doi:10.1038/s41598-017-04356-7 (2017).  
2017 82 Hafemeister, C. & Satija, R. Normalization and variance stabilization of single-cell  
2018 RNA-seq data using regularized negative binomial regression. *bioRxiv*, 576827,  
2019 doi:10.1101/576827 (2019).  
2020
